# Supplementary material
Source: publisher site journal article supplement (https://www.dovepress.com/article/325959)
Supplement: Supplementary file 1 [file get_supplementary_file.php]

**SUPPLEMENTARY MATERIAL**

**Molecular Signature and Immune Landscape of HCV-Associated  
Hepatocellular Carcinoma (HCC):  
Differences and Similarities with HBV-HCC**

Davide De Battista, Fausto Zamboni, Hannah Gerstein, Shinya Sato, Tovah E.  
Markowitz, Justin Lack, Ronald E. Engle, Patrizia Farci

## Table of Contents

|                                                 |                |
|-------------------------------------------------|----------------|
| <b>SECTION 1: SUPPLEMENTARY TABLES .....</b>    | <b>3</b>       |
| Table S1 .....                                  | 3              |
| Table S2.....                                   | 47             |
| Table S3.....                                   | 93             |
| Table S4.....                                   | 97             |
| Table S5.....                                   | 100            |
| Table S6.....                                   | 103            |
| Table S7 .....                                  | 105            |
| <br><b>SECTION 2: SUPPLEMENTARY FIGURE.....</b> | <br><b>107</b> |
| Figure S1.....                                  | 107            |

## SUPPLEMENTARY TABLES

**Table S1.** Genes differentially expressed in HCV-HCC.

| Gene Symbol   | Entrez Gene Name                                 | Fold change |
|---------------|--------------------------------------------------|-------------|
| HOXA13        | homeobox A13                                     | 7.7         |
| TRIM55        | tripartite motif containing 55                   | 5.37        |
| DHRS2         | dehydrogenase/reductase 2                        | 4.89        |
| CYP17A1       | cytochrome P450 family 17 subfamily A member 1   | 4.38        |
| GPC3          | glypican 3                                       | 4.08        |
| PI15          | peptidase inhibitor 15                           | 3.82        |
| DUSP9         | dual specificity phosphatase 9                   | 3.61        |
| TLX1          | T cell leukemia homeobox 1                       | 3.57        |
| C2CD4D        | C2 calcium dependent domain containing 4D        | 3.51        |
| PURPL         | p53 upregulated regulator of p53 levels          | 3.5         |
| TSPEAR-AS2    | TSPEAR antisense RNA 2                           | 3.42        |
| CENPF         | centromere protein F                             | 3.4         |
| RP11_146E134  |                                                  | 3.37        |
| FBXO43        | F-box protein 43                                 | 3.29        |
| MAST1         | microtubule associated serine/threonine kinase 1 | 3.26        |
| CYP7A1        | cytochrome P450 family 7 subfamily A member 1    | 3.19        |
| AC002310.11   |                                                  | 3.17        |
| LOC148709     | actin gamma 1 pseudogene                         | 3.15        |
| ANLN          | anillin actin binding protein                    | 3.09        |
| NMRAL2P       | NmrA like redox sensor 2, pseudogene             | 3.06        |
| SIX4          | SIX homeobox 4                                   | 3.06        |
| NEK2          | NIMA related kinase 2                            | 3.04        |
| ASPM          | assembly factor for spindle microtubules         | 2.9         |
| ZNF648        | zinc finger protein 648                          | 2.9         |
| H3C10         | H3 clustered histone 10                          | 2.86        |
| RP11_1151B144 |                                                  | 2.86        |
| TSPEAR-AS1    | TSPEAR antisense RNA 1                           | 2.84        |
| NUF2          | NUF2 component of NDC80 kinetochore complex      | 2.83        |
| HOXA3         | homeobox A3                                      | 2.81        |
| MRAP2         | melanocortin 2 receptor accessory protein 2      | 2.81        |
| UBE2C         | ubiquitin conjugating enzyme E2 C                | 2.78        |
| RP11-106M3.5  |                                                  | 2.76        |
| SPC24         | SPC24 component of NDC80 kinetochore complex     | 2.74        |
| FAM83D        | family with sequence similarity 83 member D      | 2.73        |
| KIF20A        | kinesin family member 20A                        | 2.72        |
| LOC100379224  | uncharacterized LOC100379224                     | 2.72        |
| HJURP         | Holliday junction recognition protein            | 2.71        |
| MYCN          | MYCN proto-oncogene, bHLH transcription factor   | 2.71        |
| SP5           | Sp5 transcription factor                         | 2.71        |
| TP73          | tumor protein p73                                | 2.71        |
| CDKN3         | cyclin dependent kinase inhibitor 3              | 2.68        |
| ESM1          | endothelial cell specific molecule 1             | 2.65        |
| FGF21         | fibroblast growth factor 21                      | 2.64        |
| TROAP         | trophinin associated protein                     | 2.63        |
| TUBAP5        | tubulin alpha pseudogene 5                       | 2.63        |
| TOP2A         | DNA topoisomerase II alpha                       | 2.62        |
| MKI67         | marker of proliferation Ki-67                    | 2.61        |
| UBE2T         | ubiquitin conjugating enzyme E2 T                | 2.61        |
| TRMT112P4     | tRNA methyltransferase subunit 11-2 pseudogene 4 | 2.56        |
| CDKN2A        | cyclin dependent kinase inhibitor 2A             | 2.54        |

|              |                                                                                |      |
|--------------|--------------------------------------------------------------------------------|------|
| KIF4A        | kinesin family member 4A                                                       | 2.53 |
| DLGAP5       | DLG associated protein 5                                                       | 2.52 |
| TGM3         | transglutaminase 3                                                             | 2.51 |
| LOC100507389 | uncharacterized LOC100507389                                                   | 2.5  |
| PBK          | PDZ binding kinase                                                             | 2.47 |
| KIF14        | kinesin family member 14                                                       | 2.46 |
| UGT2B11      | UDP glucuronosyltransferase family 2 member B11                                | 2.46 |
| C2CD4D-AS1   | C2CD4D and THEM5 antisense RNA 1                                               | 2.45 |
| CDC20        | cell division cycle 20                                                         | 2.45 |
| HMMR         | hyaluronan mediated motility receptor                                          | 2.45 |
| RP11_6811810 |                                                                                | 2.45 |
| DEPDC1       | DEP domain containing 1                                                        | 2.44 |
| IRX3         | iroquois homeobox 3                                                            | 2.44 |
| CAP2         | cyclase associated actin cytoskeleton regulatory protein 2                     | 2.41 |
| ANKRD65      | ankyrin repeat domain 65                                                       | 2.4  |
| KIF18B       | kinesin family member 18B                                                      | 2.4  |
| CCNB2        | cyclin B2                                                                      | 2.39 |
| BUB1         | BUB1 mitotic checkpoint serine/threonine kinase                                | 2.36 |
| E2F7         | E2F transcription factor 7                                                     | 2.34 |
| CDKN2B-AS1   | CDKN2B antisense RNA 1                                                         | 2.33 |
| PCOLCE2      | procollagen C-endopeptidase enhancer 2                                         | 2.32 |
| FIGNL2       | fidgetin like 2                                                                | 2.31 |
| TDGF1        | teratocarcinoma-derived growth factor 1                                        | 2.3  |
| SKA3         | spindle and kinetochore associated complex subunit 3                           | 2.28 |
| BUB1B        | BUB1 mitotic checkpoint serine/threonine kinase B                              | 2.27 |
| FHAD1        | forkhead associated phosphopeptide binding domain 1                            | 2.27 |
| H2BC15       | H2B clustered histone 15                                                       | 2.27 |
| KCNJ5        | potassium inwardly rectifying channel subfamily J member 5                     | 2.27 |
| MELK         | maternal embryonic leucine zipper kinase                                       | 2.27 |
| SHD          | Src homology 2 domain containing transforming protein D                        | 2.27 |
| AC01584916   |                                                                                | 2.26 |
| GLUL         | glutamate-ammonia ligase                                                       | 2.25 |
| LINC02575    |                                                                                | 2.25 |
| TTK          | TTK protein kinase                                                             | 2.25 |
| CDK1         | cyclin dependent kinase 1                                                      | 2.24 |
| LBX2         | ladybird homeobox 2                                                            | 2.24 |
| DIAPH3       | diaphanous related formin 3                                                    | 2.23 |
| CENPE        | centromere protein E                                                           | 2.22 |
| DBNDD1       | dysbindin domain containing 1                                                  | 2.22 |
| RP11_523H203 |                                                                                | 2.22 |
| H3C14        | H3 clustered histone 14                                                        | 2.21 |
| H3C15        | H3 clustered histone 15                                                        | 2.21 |
| KIFC1        | kinesin family member C1                                                       | 2.21 |
| NPM2         | nucleophosmin/nucleoplasmin 2                                                  | 2.21 |
| PTTG1        | PTTG1 regulator of sister chromatid separation, securin                        | 2.21 |
| CKAP2L       | cytoskeleton associated protein 2 like                                         | 2.2  |
| TMEM150B     | transmembrane protein 150B                                                     | 2.2  |
| C1orf112     | chromosome 1 open reading frame 112                                            | 2.19 |
| CDCA8        | cell division cycle associated 8                                               | 2.19 |
| ELFN2        | extracellular leucine rich repeat and fibronectin type III domain containing 2 | 2.19 |
| CICP3        | capicua transcriptional repressor pseudogene 3                                 | 2.18 |
| KRTAP5-6     | keratin associated protein 5-6                                                 | 2.18 |
| RBM24        | RNA binding motif protein 24                                                   | 2.16 |
| BP_21264C11  |                                                                                | 2.15 |
| KIF2C        | kinesin family member 2C                                                       | 2.15 |
| SLC16A11     | solute carrier family 16 member 11                                             | 2.15 |
| IHH          | Indian hedgehog signaling molecule                                             | 2.14 |

|               |                                                                   |      |
|---------------|-------------------------------------------------------------------|------|
| LINC00504     |                                                                   | 2.14 |
| CELSR3        | cadherin EGF LAG seven-pass G-type receptor 3                     | 2.13 |
| FAM72C/FAM72D | family with sequence similarity 72 member D                       | 2.13 |
| NDC80         | NDC80 kinetochore complex component                               | 2.13 |
| USH2A         | usherin                                                           | 2.13 |
| DUXAP9        | double homeobox A pseudogene 9                                    | 2.12 |
| H3C6          | H3 clustered histone 6                                            | 2.12 |
| ACSM1         | acyl-CoA synthetase medium chain family member 1                  | 2.11 |
| ERCC6L        | ERCC excision repair 6 like, spindle assembly checkpoint helicase | 2.11 |
| FOXM1         | forkhead box M1                                                   | 2.11 |
| MDK           | midkine                                                           | 2.11 |
| MYBL2         | MYB proto-oncogene like 2                                         | 2.1  |
| C21orf58      | chromosome 21 open reading frame 58                               | 2.09 |
| E2F8          | E2F transcription factor 8                                        | 2.09 |
| LINC02363     | long intergenic non-protein coding RNA 2363                       | 2.09 |
| CDCA5         | cell division cycle associated 5                                  | 2.07 |
| CES3          | carboxylesterase 3                                                | 2.07 |
| DUXAP8        | double homeobox A pseudogene 8                                    | 2.07 |
| CFHR5         | complement factor H related 5                                     | 2.06 |
| DUXAP10       | double homeobox A pseudogene 10                                   | 2.06 |
| LINC01124     | long intergenic non-protein coding RNA 1124                       | 2.06 |
| GBAP1         | glucosylceramidase beta pseudogene 1                              | 2.05 |
| PHYHIPL       | phytanoyl-CoA 2-hydroxylase interacting protein like              | 2.05 |
| PRC1          | protein regulator of cytokinesis 1                                | 2.05 |
| THBS4         | thrombospondin 4                                                  | 2.05 |
| LAMA3         | laminin subunit alpha 3                                           | 2.04 |
| CRIP3         | cysteine rich protein 3                                           | 2.03 |
| CHRM3         | cholinergic receptor muscarinic 3                                 | 2.02 |
| RP11_412D94   |                                                                   | 2.02 |
| HRAT92        | heart tissue-associated transcript 92                             | 2.01 |
| NCAPG         | non-SMC condensin I complex subunit G                             | 2.01 |
| ROBO1         | roundabout guidance receptor 1                                    | 2.01 |
| EXO1          | exonuclease 1                                                     | 2    |
| GTSE1         | G2 and S-phase expressed 1                                        | 2    |
| COL5A3        | collagen type V alpha 3 chain                                     | 1.98 |
| TBX3          | T-box transcription factor 3                                      | 1.98 |
| BMP4          | bone morphogenetic protein 4                                      | 1.97 |
| CDCA2         | cell division cycle associated 2                                  | 1.97 |
| CENPI         | centromere protein I                                              | 1.96 |
| RP11_196G1823 |                                                                   | 1.96 |
| AURKB         | aurora kinase B                                                   | 1.95 |
| ZSWIM5        | zinc finger SWIM-type containing 5                                | 1.94 |
| RP11_326C313  |                                                                   | 1.93 |
| SAPCD2        | suppressor APC domain containing 2                                | 1.93 |
| SQLE          | squalene epoxidase                                                | 1.93 |
| GDNF-AS1      | GDNF antisense RNA 1                                              | 1.91 |
| CAPN11        | calpain 11                                                        | 1.9  |
| GABRE         | gamma-aminobutyric acid type A receptor subunit epsilon           | 1.9  |
| HRCT1         | histidine rich carboxyl terminus 1                                | 1.9  |
| ZNF517        | zinc finger protein 517                                           | 1.89 |
| OLFML2A       | olfactomedin like 2A                                              | 1.88 |
| SLC26A6       | solute carrier family 26 member 6                                 | 1.88 |
| CCNB1         | cyclin B1                                                         | 1.87 |
| SKIDA1        | SKI/DACH domain containing 1                                      | 1.87 |
| GREB1         | growth regulating estrogen receptor binding 1                     | 1.86 |
| ITPKA         | inositol-trisphosphate 3-kinase A                                 | 1.84 |
| MAPT          | microtubule associated protein tau                                | 1.84 |

|               |                                                                         |      |
|---------------|-------------------------------------------------------------------------|------|
| SNX18P12      | sorting nexin 18 pseudogene 12                                          | 1.84 |
| CDKN2C        | cyclin dependent kinase inhibitor 2C                                    | 1.83 |
| HCN3          | hyperpolarization activated cyclic nucleotide gated potassium channel 3 | 1.83 |
| SGO1          | shugoshin 1                                                             | 1.83 |
| AC073111.5    |                                                                         | 1.81 |
| CMB9-55F22.1  |                                                                         | 1.81 |
| DTL           | denticleless E3 ubiquitin protein ligase homolog                        | 1.81 |
| H4C15         | H4 clustered histone 15                                                 | 1.81 |
| IQGAP3        | IQ motif containing GTPase activating protein 3                         | 1.81 |
| LINC01719     | long intergenic non-protein coding RNA 1719                             | 1.81 |
| LOC105373159  |                                                                         | 1.81 |
| DLG5          | discs large MAGUK scaffold protein 5                                    | 1.8  |
| RP11_506K64   |                                                                         | 1.8  |
| HNF1A-AS1     | HNF1A antisense RNA 1                                                   | 1.79 |
| FAM72A        | family with sequence similarity 72 member A                             | 1.78 |
| SEMA6C        | semaphorin 6C                                                           | 1.78 |
| SLC30A10      | solute carrier family 30 member 10                                      | 1.78 |
| ZNF726        | zinc finger protein 726                                                 | 1.78 |
| ABCC6P2       | ATP binding cassette subfamily C member 6 pseudogene 2                  | 1.77 |
| FGF13         | fibroblast growth factor 13                                             | 1.77 |
| CLDN15        | claudin 15                                                              | 1.76 |
| MND1          | meiotic nuclear divisions 1                                             | 1.76 |
| CCDC73        | coiled-coil domain containing 73                                        | 1.75 |
| TMPO-AS1      | TMPO antisense RNA 1                                                    | 1.75 |
| C20orf204     | chromosome 20 open reading frame 204                                    | 1.74 |
| PARD6G-AS1    | PARD6G antisense RNA 1                                                  | 1.74 |
| ACNATP        | acyl-CoA:amino acid N-acyltransferase pseudogene                        | 1.73 |
| CEP55         | centrosomal protein 55                                                  | 1.73 |
| EFNA4         | ephrin A4                                                               | 1.73 |
| RP11_156E81   |                                                                         | 1.73 |
| RUSC1-AS1     | RUSC1 antisense RNA 1                                                   | 1.73 |
| ARHGAP11A     | Rho GTPase activating protein 11A                                       | 1.72 |
| ZMIZ1-AS1     | ZMIZ1 antisense RNA 1                                                   | 1.72 |
| CDT1          | chromatin licensing and DNA replication factor 1                        | 1.71 |
| CSMD2         | CUB and Sushi multiple domains 2                                        | 1.71 |
| RP1_80N23     |                                                                         | 1.71 |
| RP1_80N24     |                                                                         | 1.71 |
| BIRC5         | baculoviral IAP repeat containing 5                                     | 1.7  |
| EEF1A1P14     | eukaryotic translation elongation factor 1 alpha 1 pseudogene 14        | 1.69 |
| ELF3-AS1      | ELF3 antisense RNA 1                                                    | 1.69 |
| TBX6          | T-box transcription factor 6                                            | 1.69 |
| ADM2          | adrenomedullin 2                                                        | 1.68 |
| CCNA2         | cyclin A2                                                               | 1.68 |
| LINC01239     | long intergenic non-protein coding RNA 1239                             | 1.68 |
| PARPBP        | PARP1 binding protein                                                   | 1.68 |
| SOWAHA        | soosondawah ankyrin repeat domain family member A                       | 1.68 |
| H4C14         | H4 clustered histone 14                                                 | 1.67 |
| IL27          | interleukin 27                                                          | 1.67 |
| RACGAP1       | Rac GTPase activating protein 1                                         | 1.67 |
| RP11_392O172  |                                                                         | 1.67 |
| ACTBP11       | ACTB pseudogene 11                                                      | 1.66 |
| BCL9          | BCL9 transcription coactivator                                          | 1.66 |
| CTC_471F35    |                                                                         | 1.66 |
| E2F1          | E2F transcription factor 1                                              | 1.66 |
| MAP10         | microtubule associated protein 10                                       | 1.66 |
| RP11-704M14.1 |                                                                         | 1.66 |
| TM4SF19-AS1   | TM4SF19 antisense RNA 1                                                 | 1.66 |

|                   |                                                         |      |
|-------------------|---------------------------------------------------------|------|
| RP11_651L53       |                                                         | 1.65 |
| H2BC20P           | H2B clustered histone 20, pseudogene                    | 1.64 |
| KIF15             | kinesin family member 15                                | 1.64 |
| KIF18A            | kinesin family member 18A                               | 1.64 |
| ZBTB18            | zinc finger and BTB domain containing 18                | 1.64 |
| MBNL3             | muscleblind like splicing regulator 3                   | 1.63 |
| RP11_690I212      |                                                         | 1.63 |
| RP11_35N66        |                                                         | 1.62 |
| DNMT3B            | DNA methyltransferase 3 beta                            | 1.61 |
| PTOV1-AS1         | PTOV1 antisense RNA 1                                   | 1.61 |
| SATB2             | SATB homeobox 2                                         | 1.61 |
| ARL4AP3           | ADP ribosylation factor like GTPase 4A pseudogene 3     | 1.6  |
| CAPN8             | calpain 8                                               | 1.6  |
| KIF11             | kinesin family member 11                                | 1.6  |
| SRGAP2D           | SLIT-ROBO Rho GTPase activating protein 2D (pseudogene) | 1.6  |
| FAM189B           | family with sequence similarity 189 member B            | 1.59 |
| LINC01126         | long intergenic non-protein coding RNA 1126             | 1.59 |
| ZKSCAN3           | zinc finger with KRAB and SCAN domains 3                | 1.59 |
| ZNF572            | zinc finger protein 572                                 | 1.59 |
| BSN               | bassoon presynaptic cytomatrix protein                  | 1.58 |
| H4C11             | H4 clustered histone 11                                 | 1.58 |
| CD2BP2-DT         | CD2BP2 divergent transcript                             | 1.57 |
| ARHGEF39          | Rho guanine nucleotide exchange factor 39               | 1.56 |
| KAZALD1           | Kazal type serine peptidase inhibitor domain 1          | 1.56 |
| LL22NC03-N14H11.1 |                                                         | 1.56 |
| LOC171391         | uncharacterized LOC171391                               | 1.56 |
| HJV               | hemojuvelin BMP co-receptor                             | 1.55 |
| PDZK1P1           | PDZ domain containing 1 pseudogene 1                    | 1.55 |
| LHX4              | LIM homeobox 4                                          | 1.54 |
| LOC100133286      | uncharacterized LOC100133286                            | 1.54 |
| RAD54B            | RAD54 homolog B                                         | 1.54 |
| CCDC34            | coiled-coil domain containing 34                        | 1.53 |
| FAM78B            | family with sequence similarity 78 member B             | 1.53 |
| FDPS              | farnesyl diphosphate synthase                           | 1.53 |
| GNRHR2            | gonadotropin releasing hormone receptor 2 (pseudogene)  | 1.53 |
| POLQ              | DNA polymerase theta                                    | 1.53 |
| PRUNE1            | prune exopolyphosphatase 1                              | 1.53 |
| PTGES3P2          | prostaglandin E synthase 3 pseudogene 2                 | 1.53 |
| GBA               | glucosylceramidase beta                                 | 1.52 |
| NOX4              | NADPH oxidase 4                                         | 1.52 |
| RP11_1055B84      |                                                         | 1.52 |
| RP11_326C311      |                                                         | 1.52 |
| PDZK1             | PDZ domain containing 1                                 | 1.51 |
| SPATA46           | spermatogenesis associated 46                           | 1.51 |
| AC1380353         |                                                         | 1.5  |
| GREB1L            | GREB1 like retinoic acid receptor coactivator           | 1.5  |
| LINC01138         | long intergenic non-protein coding RNA 1138             | 1.5  |
| AC0742125         |                                                         | 1.49 |
| DRC7              | dynein regulatory complex subunit 7                     | 1.49 |
| LOC101930100      | uncharacterized LOC101930100                            | 1.49 |
| RNF43             | ring finger protein 43                                  | 1.49 |
| SEPSECS-AS1       | SEPSECS antisense RNA 1 (head to head)                  | 1.49 |
| ZBTB12            | zinc finger and BTB domain containing 12                | 1.49 |
| AC068831.7        |                                                         | 1.48 |
| CENPL             | centromere protein L                                    | 1.48 |
| RECQL4            | RecQ like helicase 4                                    | 1.48 |
| TCF19             | transcription factor 19                                 | 1.48 |

|              |                                                              |      |
|--------------|--------------------------------------------------------------|------|
| CCNF         | cyclin F                                                     | 1.47 |
| ESPL1        | extra spindle pole bodies like 1, separase                   | 1.47 |
| KIF23        | kinesin family member 23                                     | 1.47 |
| MEX3A        | mex-3 RNA binding family member A                            | 1.47 |
| NOS1AP       | nitric oxide synthase 1 adaptor protein                      | 1.47 |
| PLK1         | polo like kinase 1                                           | 1.47 |
| PRR11        | proline rich 11                                              | 1.47 |
| SCML2        | Scm polycomb group protein like 2                            | 1.47 |
| TP53I3       | tumor protein p53 inducible protein 3                        | 1.47 |
| ZNF252P-AS1  | ZNF252P antisense RNA 1                                      | 1.47 |
| HES6         | hes family bHLH transcription factor 6                       | 1.46 |
| PKDREJ       | polycystin family receptor for egg jelly                     | 1.46 |
| TPX2         | TPX2 microtubule nucleation factor                           | 1.46 |
| UHRF1        | ubiquitin like with PHD and ring finger domains 1            | 1.46 |
| CDCA3        | cell division cycle associated 3                             | 1.45 |
| H2BC18       | H2B clustered histone 18                                     | 1.45 |
| ONECUT2      | one cut homeobox 2                                           | 1.45 |
| RP11_61J195  |                                                              | 1.45 |
| ASF1B        | anti-silencing function 1B histone chaperone                 | 1.44 |
| C1orf226     | chromosome 1 open reading frame 226                          | 1.44 |
| LAGE3        | L antigen family member 3                                    | 1.44 |
| LINC01285    | long intergenic non-protein coding RNA 1285                  | 1.44 |
| BNIP1        | BCL2 interacting protein like                                | 1.43 |
| BOLA1        | bolA family member 1                                         | 1.43 |
| LRRC45       | leucine rich repeat containing 45                            | 1.43 |
| LYSMD1       | LysM domain containing 1                                     | 1.43 |
| TONSL        | tonsoku like, DNA repair protein                             | 1.43 |
| APC2         | APC regulator of WNT signaling pathway 2                     | 1.42 |
| ASB16        | ankyrin repeat and SOCS box containing 16                    | 1.42 |
| DBP          | D-box binding PAR bZIP transcription factor                  | 1.42 |
| EME1         | essential meiotic structure-specific endonuclease 1          | 1.42 |
| RABEPK       | Rab9 effector protein with kelch motifs                      | 1.42 |
| RP11_798K32  |                                                              | 1.42 |
| RRM2         | ribonucleotide reductase regulatory subunit M2               | 1.42 |
| C1orf35      | chromosome 1 open reading frame 35                           | 1.41 |
| CTA_315H112  |                                                              | 1.41 |
| OAZ3         | ornithine decarboxylase antizyme 3                           | 1.41 |
| ZBED8        | zinc finger BED-type containing 8                            | 1.41 |
| LOC155060    | AI894139 pseudogene                                          | 1.4  |
| LOC730101    | uncharacterized LOC730101                                    | 1.4  |
| OIP5         | Opa interacting protein 5                                    | 1.4  |
| SH3RF2       | SH3 domain containing ring finger 2                          | 1.4  |
| STRIP2       | striatin interacting protein 2                               | 1.4  |
| ZWINT        | ZW10 interacting kinetochore protein                         | 1.4  |
| GINS1        | GINS complex subunit 1                                       | 1.39 |
| GP1R         | G protein-coupled estrogen receptor 1                        | 1.39 |
| LOC100129484 | uncharacterized LOC100129484                                 | 1.39 |
| MSTO1        | misato mitochondrial distribution and morphology regulator 1 | 1.39 |
| RP11_295G202 |                                                              | 1.39 |
| CPLX1        | complexin 1                                                  | 1.38 |
| EFHD1        | EF-hand domain family member D1                              | 1.38 |
| HOXA-AS2     | HOXA cluster antisense RNA 2                                 | 1.38 |
| NCAPH        | non-SMC condensin I complex subunit H                        | 1.38 |
| ZNF563       | zinc finger protein 563                                      | 1.38 |
| MANEAL       | mannosidase endo-alpha like                                  | 1.37 |
| SMO          | smoothened, frizzled class receptor                          | 1.37 |
| TMEM79       | transmembrane protein 79                                     | 1.37 |



|                          |                                                           |      |
|--------------------------|-----------------------------------------------------------|------|
| FRS3                     | fibroblast growth factor receptor substrate 3             | 1.36 |
| ZNF221                   | zinc finger protein 221                                   | 1.36 |
| C5orf34                  | chromosome 5 open reading frame 34                        | 1.35 |
| HNRNPCP7                 | heterogeneous nuclear ribonucleoprotein C pseudogene 7    | 1.35 |
| RP11_565P226             |                                                           | 1.35 |
| SAC3D1                   | SAC3 domain containing 1                                  | 1.35 |
| SGO2                     | shugoshin 2                                               | 1.35 |
| TARBP1                   | TAR (HIV-1) RNA binding protein 1                         | 1.35 |
| TDRKH                    | tudor and KH domain containing                            | 1.35 |
| TICRR                    | TOPBP1 interacting checkpoint and replication regulator   | 1.35 |
| AC0921714                |                                                           | 1.34 |
| CILK1                    | ciliogenesis associated kinase 1                          | 1.34 |
| FOXRED2                  | FAD dependent oxidoreductase domain containing 2          | 1.34 |
| GOLPH3L                  | golgi phosphoprotein 3 like                               | 1.34 |
| PSMD4                    | proteasome 26S subunit, non-ATPase 4                      | 1.34 |
| RP11_715J226             |                                                           | 1.34 |
| ZBED6                    | zinc finger BED-type containing 6                         | 1.34 |
| FOXD2                    | forkhead box D2                                           | 1.33 |
| GPR137C                  | G protein-coupled receptor 137C                           | 1.33 |
| LOC101926967             | uncharacterized LOC101926967                              | 1.33 |
| STXBP6                   | syntaxin binding protein 6                                | 1.33 |
| XRCC2                    | X-ray repair cross complementing 2                        | 1.33 |
| C19orf57                 | chromosome 19 open reading frame 57                       | 1.32 |
| LIN9                     | lin-9 DREAM MuvB core complex component                   | 1.32 |
| RNASEH2A                 | ribonuclease H2 subunit A                                 | 1.32 |
| THOP1                    | thimet oligopeptidase 1                                   | 1.32 |
| FLVCR1-DT                | FLVCR1 divergent transcript                               | 1.31 |
| LINC01011                | long intergenic non-protein coding RNA 1011               | 1.31 |
| LINC01127                | long intergenic non-protein coding RNA 1127               | 1.31 |
| SLC29A1                  | solute carrier family 29 member 1 (Augustine blood group) | 1.31 |
| C5orf66                  | chromosome 5 open reading frame 66                        | 1.3  |
| KLHDC7B                  | kelch domain containing 7B                                | 1.3  |
| LINC02542                | long intergenic non-protein coding RNA 2542               | 1.3  |
| MSH5-SAPCD1              | MSH5-SAPCD1 readthrough (NMD candidate)                   | 1.3  |
| MSTO2P                   | misato family member 2, pseudogene                        | 1.3  |
| NECAB3                   | N-terminal EF-hand calcium binding protein 3              | 1.3  |
| RP3_406P245              |                                                           | 1.3  |
| ZNRD1ASP                 | zinc ribbon domain containing 1 antisense, pseudogene     | 1.3  |
| CTB_52I24                |                                                           | 1.29 |
| FLVCR1                   | FLVCR heme transporter 1                                  | 1.29 |
| HSPB1                    | heat shock protein family B (small) member 1              | 1.29 |
| KIF24                    | kinesin family member 24                                  | 1.29 |
| KLHDC9                   | kelch domain containing 9                                 | 1.29 |
| LOC100507437             | uncharacterized LOC100507437                              | 1.29 |
| RP3_402G1126             |                                                           | 1.29 |
| C1orf53                  | chromosome 1 open reading frame 53                        | 1.28 |
| CRYZL2P                  | crystallin zeta like 2, pseudogene                        | 1.28 |
| FIGNL1                   | fidgetin like 1                                           | 1.28 |
| HASPIN                   | histone H3 associated protein kinase                      | 1.28 |
| LINC01144                | long intergenic non-protein coding RNA 1144               | 1.28 |
| MTBP                     | MDM2 binding protein                                      | 1.28 |
| NBPF10 (includes others) | NBPF member 19                                            | 1.28 |
| PPOX                     | protoporphyrinogen oxidase                                | 1.28 |
| RGS5                     | regulator of G protein signaling 5                        | 1.28 |
| RP11_223I101             |                                                           | 1.28 |
| RP11_5A195               |                                                           | 1.28 |

|               |                                                            |      |
|---------------|------------------------------------------------------------|------|
| U731662       |                                                            | 1.28 |
| EFNA3         | ephrin A3                                                  | 1.27 |
| PCLAF         | PCNA clamp associated factor                               | 1.27 |
| RP11-472I20.4 |                                                            | 1.27 |
| RP11_486G152  |                                                            | 1.27 |
| TRIP13        | thyroid hormone receptor interactor 13                     | 1.27 |
| WBP2NL        | WBP2 N-terminal like                                       | 1.27 |
| ZBED3         | zinc finger BED-type containing 3                          | 1.27 |
| CEL           | carboxyl ester lipase                                      | 1.26 |
| HELLPAR       | HELLP associated long non-coding RNA                       | 1.26 |
| INCENP        | inner centromere protein                                   | 1.26 |
| LINC00638     | long intergenic non-protein coding RNA 638                 | 1.26 |
| LINC02177     | long intergenic non-protein coding RNA 2177                | 1.26 |
| PRLR          | prolactin receptor                                         | 1.26 |
| SLCO1A2       | solute carrier organic anion transporter family member 1A2 | 1.26 |
| TLL7          | tubulin tyrosine ligase like 7                             | 1.26 |
| ACP6          | acid phosphatase 6, lysophosphatidic                       | 1.25 |
| EHMT2         | euchromatic histone lysine methyltransferase 2             | 1.25 |
| EZH2          | enhancer of zeste 2 polycomb repressive complex 2 subunit  | 1.25 |
| LINC00528     | long intergenic non-protein coding RNA 528                 | 1.25 |
| RNF187        | ring finger protein 187                                    | 1.25 |
| RP11_1109F113 |                                                            | 1.25 |
| RP11_337C188  |                                                            | 1.25 |
| TRAIIP        | TRAF interacting protein                                   | 1.25 |
| CDH13         | cadherin 13                                                | 1.24 |
| DOC2GP        | double C2 domain gamma, pseudogene                         | 1.24 |
| DTNA          | dystrobrevin alpha                                         | 1.24 |
| GOLGA2P5      | GOLGA2 pseudogene 5                                        | 1.24 |
| NUSAP1        | nucleolar and spindle associated protein 1                 | 1.24 |
| PCDHB13       | protocadherin beta 13                                      | 1.24 |
| AC025171.1    |                                                            | 1.23 |
| CEBPA-DT      | CEBPA divergent transcript                                 | 1.23 |
| FSBP          | fibrinogen silencer binding protein                        | 1.23 |
| GVQW3         | GVQW motif containing 3                                    | 1.23 |
| KLHL13        | kelch like family member 13                                | 1.23 |
| MSH5          | mutS homolog 5                                             | 1.23 |
| PSPH          | phosphoserine phosphatase                                  | 1.23 |
| RP11_6024     |                                                            | 1.23 |
| SLC25A21-AS1  | SLC25A21 antisense RNA 1                                   | 1.23 |
| UBQLN4        | ubiquilin 4                                                | 1.23 |
| ATOX1         | antioxidant 1 copper chaperone                             | 1.22 |
| CECR2         | CECR2 histone acetyl-lysine reader                         | 1.22 |
| CTD_2287O165  |                                                            | 1.22 |
| EFNA2         | ephrin A2                                                  | 1.22 |
| MCMDC2        | minichromosome maintenance domain containing 2             | 1.22 |
| RP11_600F247  |                                                            | 1.22 |
| SCN8A         | sodium voltage-gated channel alpha subunit 8               | 1.22 |
| AC0048626     |                                                            | 1.21 |
| DIPK1B        | divergent protein kinase domain 1B                         | 1.21 |
| KNL1          | kinetochore scaffold 1                                     | 1.21 |
| MTR           | 5-methyltetrahydrofolate-homocysteine methyltransferase    | 1.21 |
| NHLRC1        | NHL repeat containing E3 ubiquitin protein ligase 1        | 1.21 |
| RHBDL1        | rhomboid like 1                                            | 1.21 |
| RP11_20I204   |                                                            | 1.21 |
| ZNF337-AS1    | ZNF337 antisense RNA 1                                     | 1.21 |
| ZNF687        | zinc finger protein 687                                    | 1.21 |
| FBXL22        | F-box and leucine rich repeat protein 22                   | 1.2  |

|               |                                                              |      |
|---------------|--------------------------------------------------------------|------|
| PRAP1         | proline rich acidic protein 1                                | 1.2  |
| C2orf16       | chromosome 2 open reading frame 16                           | 1.19 |
| CDKN2B        | cyclin dependent kinase inhibitor 2B                         | 1.19 |
| RAD51AP1      | RAD51 associated protein 1                                   | 1.19 |
| RP11_552F312  |                                                              | 1.19 |
| SKP2          | S-phase kinase associated protein 2                          | 1.19 |
| STIL          | STIL centriolar assembly protein                             | 1.19 |
| ABCD1         | ATP binding cassette subfamily D member 1                    | 1.18 |
| ARHGEF11      | Rho guanine nucleotide exchange factor 11                    | 1.18 |
| C1orf74       | chromosome 1 open reading frame 74                           | 1.18 |
| LOC105376805  |                                                              | 1.18 |
| PRKAB2        | protein kinase AMP-activated non-catalytic subunit beta 2    | 1.18 |
| PRKAR2A-AS1   | PRKAR2A antisense RNA 1                                      | 1.18 |
| RP11_77P62    |                                                              | 1.18 |
| WHRN          | whirlin                                                      | 1.18 |
| CGREF1        | cell growth regulator with EF-hand domain 1                  | 1.17 |
| CLTCL1        | clathrin heavy chain like 1                                  | 1.17 |
| CTD-220118.1  | uncharacterized LOC101929215                                 | 1.17 |
| HSD17B7       | hydroxysteroid 17-beta dehydrogenase 7                       | 1.17 |
| LINC02606     | long intergenic non-protein coding RNA 2606                  | 1.17 |
| RP11_106M33   |                                                              | 1.17 |
| RP11_16N112   |                                                              | 1.17 |
| RP11_94C2413  |                                                              | 1.17 |
| STMN1         | stathmin 1                                                   | 1.17 |
| CCDC163       | coiled-coil domain containing 163                            | 1.16 |
| GLMP          | glycosylated lysosomal membrane protein                      | 1.16 |
| GPAA1         | glycosylphosphatidylinositol anchor attachment 1             | 1.16 |
| MAD2L1        | mitotic arrest deficient 2 like 1                            | 1.16 |
| PIGC          | phosphatidylinositol glycan anchor biosynthesis class C      | 1.16 |
| SCAMP3        | secretory carrier membrane protein 3                         | 1.16 |
| SH3BP5L       | SH3 binding domain protein 5 like                            | 1.16 |
| SMYD2         | SET and MYND domain containing 2                             | 1.16 |
| TMEM169       | transmembrane protein 169                                    | 1.16 |
| CH17-340M24.3 | uncharacterized protein BC009467                             | 1.15 |
| CKAP2         | cytoskeleton associated protein 2                            | 1.15 |
| DPM3          | dolichyl-phosphate mannosyltransferase subunit 3, regulatory | 1.15 |
| FLJ46284      | uncharacterized LOC441369                                    | 1.15 |
| GOLGA2P7      | GOLGA2 pseudogene 7                                          | 1.15 |
| RP11_399B171  |                                                              | 1.15 |
| TEDC2         | tubulin epsilon and delta complex 2                          | 1.15 |
| ZNF775        | zinc finger protein 775                                      | 1.15 |
| ACBD6         | acyl-CoA binding domain containing 6                         | 1.14 |
| CITF22_92A61  |                                                              | 1.14 |
| CTC_351M121   |                                                              | 1.14 |
| ECT2          | epithelial cell transforming 2                               | 1.14 |
| EMC3-AS1      | EMC3 antisense RNA 1                                         | 1.14 |
| FAM53A        | family with sequence similarity 53 member A                  | 1.14 |
| HNRNPA1P16    | heterogeneous nuclear ribonucleoprotein A1 pseudogene 16     | 1.14 |
| KRTCAP2       | keratinocyte associated protein 2                            | 1.14 |
| PAQR9-AS1     | PAQR9 antisense RNA 1                                        | 1.14 |
| PGBD1         | piggyBac transposable element derived 1                      | 1.14 |
| RP5_908M1410  |                                                              | 1.14 |
| SRRM2-AS1     | SRRM2 antisense RNA 1                                        | 1.14 |
| TBCE          | tubulin folding cofactor E                                   | 1.14 |
| TSSK6         | testis specific serine kinase 6                              | 1.14 |
| ZBTB41        | zinc finger and BTB domain containing 41                     | 1.14 |
| DCST2         | DC-STAMP domain containing 2                                 | 1.13 |

|                        |                                                             |      |
|------------------------|-------------------------------------------------------------|------|
| LOC112267983           | uncharacterized LOC112267983                                | 1.13 |
| LRRC14                 | leucine rich repeat containing 14                           | 1.13 |
| RP5_1136G132           |                                                             | 1.13 |
| TK1                    | thymidine kinase 1                                          | 1.13 |
| UBQLN4P1               | ubiquilin 4 pseudogene 1                                    | 1.13 |
| VPS45                  | vacuolar protein sorting 45 homolog                         | 1.13 |
| ZNF280C                | zinc finger protein 280C                                    | 1.13 |
| AC0093032              |                                                             | 1.12 |
| CCDC142                | coiled-coil domain containing 142                           | 1.12 |
| CDHR5                  | cadherin related family member 5                            | 1.12 |
| DUSP23                 | dual specificity phosphatase 23                             | 1.12 |
| LOC100288637           | OTU deubiquitinase 7A pseudogene                            | 1.12 |
| RP11_378J188           |                                                             | 1.12 |
| SETDB1                 | SET domain bifurcated histone lysine methyltransferase 1    | 1.12 |
| USP21                  | ubiquitin specific peptidase 21                             | 1.12 |
| ZNF497                 | zinc finger protein 497                                     | 1.12 |
| ZNF503-AS2             | ZNF503 antisense RNA 2                                      | 1.12 |
| CEP152                 | centrosomal protein 152                                     | 1.11 |
| CTB_25B1312            |                                                             | 1.11 |
| CTD_2517M2214          |                                                             | 1.11 |
| FHIT                   | fragile histidine triad diadenosine triphosphatase          | 1.11 |
| GGH                    | gamma-glutamyl hydrolase                                    | 1.11 |
| HAUS4                  | HAUS augmin like complex subunit 4                          | 1.11 |
| RP11_175P133           |                                                             | 1.11 |
| SCNM1                  | sodium channel modifier 1                                   | 1.11 |
| TOMM40L                | translocase of outer mitochondrial membrane 40 like         | 1.11 |
| VPS72                  | vacuolar protein sorting 72 homolog                         | 1.11 |
| AKR1C3                 | aldo-keto reductase family 1 member C3                      | 1.1  |
| CNIH4                  | cornichon family AMPA receptor auxiliary protein 4          | 1.1  |
| ERBB3                  | erb-b2 receptor tyrosine kinase 3                           | 1.1  |
| F8A1 (includes others) | coagulation factor VIII associated 1                        | 1.1  |
| FAM91A2P               | protein FAM91A1-like                                        | 1.1  |
| FGD1                   | FYVE, RhoGEF and PH domain containing 1                     | 1.1  |
| FTOP1                  | FTO pseudogene 1                                            | 1.1  |
| LOC100129917           | uncharacterized LOC100129917                                | 1.1  |
| LOC107985305           |                                                             | 1.1  |
| PAQR9                  | progesterin and adipoQ receptor family member 9             | 1.1  |
| RP11_316M112           |                                                             | 1.1  |
| SOX13                  | SRY-box transcription factor 13                             | 1.1  |
| TMEM81                 | transmembrane protein 81                                    | 1.1  |
| ZFP41                  | ZFP41 zinc finger protein                                   | 1.1  |
| ANO8                   | anoctamin 8                                                 | 1.09 |
| ARHGAP11B              | Rho GTPase activating protein 11B                           | 1.09 |
| C7orf25                | chromosome 7 open reading frame 25                          | 1.09 |
| KMT2E-AS1              | KMT2E antisense RNA 1                                       | 1.09 |
| LAMTOR2                | late endosomal/lysosomal adaptor, MAPK and MTOR activator 2 | 1.09 |
| METTL18                | methyltransferase like 18                                   | 1.09 |
| PIGM                   | phosphatidylinositol glycan anchor biosynthesis class M     | 1.09 |
| PPP1R3E                | protein phosphatase 1 regulatory subunit 3E                 | 1.09 |
| RP3_508I159            |                                                             | 1.09 |
| SSR4P1                 | signal sequence receptor subunit 4 pseudogene 1             | 1.09 |
| DNM3                   | dynamamin 3                                                 | 1.08 |
| EIF2AK3-DT             | EIF2AK3 divergent transcript                                | 1.08 |
| EIF2D                  | eukaryotic translation initiation factor 2D                 | 1.08 |
| NUAK1                  | NUAK family kinase 1                                        | 1.08 |
| PYGO2                  | pygopus family PHD finger 2                                 | 1.08 |
| RP11_713M152           |                                                             | 1.08 |

|               |                                                                         |      |
|---------------|-------------------------------------------------------------------------|------|
| SLC10A5       | solute carrier family 10 member 5                                       | 1.08 |
| SLC22A23      | solute carrier family 22 member 23                                      | 1.08 |
| ANKRD13B      | ankyrin repeat domain 13B                                               | 1.07 |
| CALML6        | calmodulin like 6                                                       | 1.07 |
| IFT81         | intraflagellar transport 81                                             | 1.07 |
| LBX2-AS1      | LBX2 antisense RNA 1                                                    | 1.07 |
| LOC102724064  | uncharacterized LOC102724064                                            | 1.07 |
| PLA2G6        | phospholipase A2 group VI                                               | 1.07 |
| RP11_197N182  |                                                                         | 1.07 |
| SLC16A1-AS1   | SLC16A1 antisense RNA 1                                                 | 1.07 |
| SRGAP2        | SLIT-ROBO Rho GTPase activating protein 2                               | 1.07 |
| TMC3-AS1      | TMC3 antisense RNA 1                                                    | 1.07 |
| USP49         | ubiquitin specific peptidase 49                                         | 1.07 |
| ESCO2         | establishment of sister chromatid cohesion N-acetyltransferase 2        | 1.06 |
| HMGCS1        | 3-hydroxy-3-methylglutaryl-CoA synthase 1                               | 1.06 |
| HSF4          | heat shock transcription factor 4                                       | 1.06 |
| LNCTAM34A     | long non coding transcriptional activator of miR34a                     | 1.06 |
| POGZ          | pogo transposable element derived with ZNF domain                       | 1.06 |
| RP11_10N232   |                                                                         | 1.06 |
| RP11_111M223  |                                                                         | 1.06 |
| RP11_439E199  |                                                                         | 1.06 |
| ZNF692        | zinc finger protein 692                                                 | 1.06 |
| CFHR2         | complement factor H related 2                                           | 1.05 |
| CTD_2006H142  |                                                                         | 1.05 |
| DAPK2         | death associated protein kinase 2                                       | 1.05 |
| FAM83H        | family with sequence similarity 83 member H                             | 1.05 |
| FBXL18        | F-box and leucine rich repeat protein 18                                | 1.05 |
| GLI4          | GLI family zinc finger 4                                                | 1.05 |
| LRRC20        | leucine rich repeat containing 20                                       | 1.05 |
| MBLAC1        | metallo-beta-lactamase domain containing 1                              | 1.05 |
| NTN3          | netrin 3                                                                | 1.05 |
| PIK3C2B       | phosphatidylinositol-4-phosphate 3-kinase catalytic subunit type 2 beta | 1.05 |
| PLK4          | polo like kinase 4                                                      | 1.05 |
| PXMP4         | peroxisomal membrane protein 4                                          | 1.05 |
| RP11_1415C144 |                                                                         | 1.05 |
| RP11_30L154   |                                                                         | 1.05 |
| RP11_45A174   |                                                                         | 1.05 |
| SF3B4         | splicing factor 3b subunit 4                                            | 1.05 |
| SNX27         | sorting nexin 27                                                        | 1.05 |
| TAZ           | tafazzin                                                                | 1.05 |
| TSEN15        | tRNA splicing endonuclease subunit 15                                   | 1.05 |
| UBE2S         | ubiquitin conjugating enzyme E2 S                                       | 1.05 |
| ADCK5         | aarF domain containing kinase 5                                         | 1.04 |
| BCAT2         | branched chain amino acid transaminase 2                                | 1.04 |
| CLK2          | CDC like kinase 2                                                       | 1.04 |
| CSPG4P10      | chondroitin sulfate proteoglycan 4 pseudogene 10                        | 1.04 |
| DPY19L1P1     | DPY19L1 pseudogene 1                                                    | 1.04 |
| EBF3          | EBF transcription factor 3                                              | 1.04 |
| FBXL8         | F-box and leucine rich repeat protein 8                                 | 1.04 |
| LINC01515     | long intergenic non-protein coding RNA 1515                             | 1.04 |
| RP11_797H71   |                                                                         | 1.04 |
| SAPCD1        | suppressor APC domain containing 1                                      | 1.04 |
| UBAP2L        | ubiquitin associated protein 2 like                                     | 1.04 |
| ASPSCR1       | ASPSCR1 tether for SLC2A4, UBX domain containing                        | 1.03 |
| IRF6          | interferon regulatory factor 6                                          | 1.03 |
| LOC644656     | uncharacterized LOC644656                                               | 1.03 |
| S100A10       | S100 calcium binding protein A10                                        | 1.03 |

|                           |                                                            |       |
|---------------------------|------------------------------------------------------------|-------|
| SUV39H1                   | suppressor of variegation 3-9 homolog 1                    | 1.03  |
| ANGEL2                    | angel homolog 2                                            | 1.02  |
| CENPK                     | centromere protein K                                       | 1.02  |
| CHAD                      | chondroadherin                                             | 1.02  |
| EPHX1                     | epoxide hydrolase 1                                        | 1.02  |
| GOLGA8K (includes others) | golgin A8 family member K                                  | 1.02  |
| INTS3                     | integrator complex subunit 3                               | 1.02  |
| LOC100996842              | uncharacterized LOC100996842                               | 1.02  |
| MINDY1                    | MINDY lysine 48 deubiquitinase 1                           | 1.02  |
| MRPL24                    | mitochondrial ribosomal protein L24                        | 1.02  |
| NENF                      | neudesin neurotrophic factor                               | 1.02  |
| OBI1-AS1                  | OBI1 antisense RNA 1                                       | 1.02  |
| PEX11B                    | peroxisomal biogenesis factor 11 beta                      | 1.02  |
| RASAL2                    | RAS protein activator like 2                               | 1.02  |
| TNFSF4                    | TNF superfamily member 4                                   | 1.02  |
| AC0936279                 |                                                            | 1.01  |
| DEGS2                     | delta 4-desaturase, sphingolipid 2                         | 1.01  |
| DLL4                      | delta like canonical Notch ligand 4                        | 1.01  |
| DVL2                      | dishevelled segment polarity protein 2                     | 1.01  |
| KDM5B                     | lysine demethylase 5B                                      | 1.01  |
| LINC01006                 | long intergenic non-protein coding RNA 1006                | 1.01  |
| MAP2                      | microtubule associated protein 2                           | 1.01  |
| MICB                      | MHC class I polypeptide-related sequence B                 | 1.01  |
| P3H4                      | prolyl 3-hydroxylase family member 4 (inactive)            | 1.01  |
| RP11_3471197              |                                                            | 1.01  |
| RP11_546D63               |                                                            | 1.01  |
| RPS6KL1                   | ribosomal protein S6 kinase like 1                         | 1.01  |
| KHDC4                     | KH domain containing 4, pre-mRNA splicing factor           | 1     |
| LOC105371450              | uncharacterized LOC105371450                               | 1     |
| CD3E                      | CD3e molecule                                              | -1    |
| FANCC                     | FA complementation group C                                 | -1    |
| GYPC                      | glycophorin C (Gerbich blood group)                        | -1    |
| ITPRIPL1                  | ITPRIP like 1                                              | -1    |
| MSANTD4                   | Myb/SANT DNA binding domain containing 4 with coiled-coils | -1    |
| WIPF1                     | WAS/WASL interacting protein family member 1               | -1    |
| AIF1                      | allograft inflammatory factor 1                            | -1.01 |
| ASNS                      | asparagine synthetase (glutamine-hydrolyzing)              | -1.01 |
| CCDC183                   | coiled-coil domain containing 183                          | -1.01 |
| CYP2J2                    | cytochrome P450 family 2 subfamily J member 2              | -1.01 |
| DENND2A                   | DENN domain containing 2A                                  | -1.01 |
| FMNL1                     | formin like 1                                              | -1.01 |
| GALNT6                    | polypeptide N-acetylgalactosaminyltransferase 6            | -1.01 |
| GPX3                      | glutathione peroxidase 3                                   | -1.01 |
| IL17RE                    | interleukin 17 receptor E                                  | -1.01 |
| JAK3                      | Janus kinase 3                                             | -1.01 |
| LDLR                      | low density lipoprotein receptor                           | -1.01 |
| NFATC2                    | nuclear factor of activated T cells 2                      | -1.01 |
| PLEK                      | pleckstrin                                                 | -1.01 |
| PLSCR1                    | phospholipid scramblase 1                                  | -1.01 |
| RPP25                     | ribonuclease P and MRP subunit p25                         | -1.01 |
| SLC20A1                   | solute carrier family 20 member 1                          | -1.01 |
| ABR                       | ABR activator of RhoGEF and GTPase                         | -1.02 |
| ADGRL2                    | adhesion G protein-coupled receptor L2                     | -1.02 |
| ATG2A                     | autophagy related 2A                                       | -1.02 |
| BTBD19                    | BTB domain containing 19                                   | -1.02 |
| C11orf21                  | chromosome 11 open reading frame 21                        | -1.02 |

|              |                                                    |       |
|--------------|----------------------------------------------------|-------|
| C21orf91     | chromosome 21 open reading frame 91                | -1.02 |
| CASP4        | caspase 4                                          | -1.02 |
| CCDC88B      | coiled-coil domain containing 88B                  | -1.02 |
| FGR          | FGR proto-oncogene, Src family tyrosine kinase     | -1.02 |
| GAS6         | growth arrest specific 6                           | -1.02 |
| GBP1         | guanylate binding protein 1                        | -1.02 |
| HOOK1        | hook microtubule tethering protein 1               | -1.02 |
| NCF4         | neutrophil cytosolic factor 4                      | -1.02 |
| NLGN2        | neuroligin 2                                       | -1.02 |
| RYR1         | ryanodine receptor 1                               | -1.02 |
| SIRPB2       | signal regulatory protein beta 2                   | -1.02 |
| SLC24A4      | solute carrier family 24 member 4                  | -1.02 |
| SP140        | SP140 nuclear body protein                         | -1.02 |
| TLE3         | TLE family member 3, transcriptional corepressor   | -1.02 |
| GCLM         | glutamate-cysteine ligase modifier subunit         | -1.03 |
| HS3ST3B1     | heparan sulfate-glucosamine 3-sulfotransferase 3B1 | -1.03 |
| LOC554249    | uncharacterized LOC554249                          | -1.03 |
| LST1         | leukocyte specific transcript 1                    | -1.03 |
| NTN4         | netrin 4                                           | -1.03 |
| POU2F2       | POU class 2 homeobox 2                             | -1.03 |
| RAB27A       | RAB27A, member RAS oncogene family                 | -1.03 |
| SERPINB9P1   | serpin family B member 9 pseudogene 1              | -1.03 |
| SYNM         | synemin                                            | -1.03 |
| TMEM273      | transmembrane protein 273                          | -1.03 |
| JDP2         | Jun dimerization protein 2                         | -1.04 |
| KRT18        | keratin 18                                         | -1.04 |
| LILRB4       | leukocyte immunoglobulin like receptor B4          | -1.04 |
| MAT1A        | methionine adenosyltransferase 1A                  | -1.04 |
| PEAR1        | platelet endothelial aggregation receptor 1        | -1.04 |
| PHLDB2       | pleckstrin homology like domain family B member 2  | -1.04 |
| RP11_116D21  |                                                    | -1.04 |
| RP11_463O125 |                                                    | -1.04 |
| RP4_734G223  |                                                    | -1.04 |
| TNFSF13      | TNF superfamily member 13                          | -1.04 |
| TPD52L1      | TPD52 like 1                                       | -1.04 |
| TTC39C       | tetratricopeptide repeat domain 39C                | -1.04 |
| UGT2A3       | UDP glucuronosyltransferase family 2 member A3     | -1.04 |
| ZDHHC1       | zinc finger DHHC-type containing 1                 | -1.04 |
| ARHGAP25     | Rho GTPase activating protein 25                   | -1.05 |
| CARMIL1      | capping protein regulator and myosin 1 linker 1    | -1.05 |
| DUSP14       | dual specificity phosphatase 14                    | -1.05 |
| IGFBP4       | insulin like growth factor binding protein 4       | -1.05 |
| PARVG        | parvin gamma                                       | -1.05 |
| RAC2         | Rac family small GTPase 2                          | -1.05 |
| SLC35G1      | solute carrier family 35 member G1                 | -1.05 |
| TLE4         | TLE family member 4, transcriptional corepressor   | -1.05 |
| ANGPTL4      | angiopoietin like 4                                | -1.06 |
| CDC37L1      | cell division cycle 37 like 1                      | -1.06 |
| GDA          | guanine deaminase                                  | -1.06 |
| GJC3         | gap junction protein gamma 3                       | -1.06 |
| GNB4         | G protein subunit beta 4                           | -1.06 |
| HIC1         | HIC ZBTB transcriptional repressor 1               | -1.06 |
| LDHAP4       | lactate dehydrogenase A pseudogene 4               | -1.06 |
| LRG1         | leucine rich alpha-2-glycoprotein 1                | -1.06 |
| MARVELD1     | MARVEL domain containing 1                         | -1.06 |
| NAALAD2      | N-acetylated alpha-linked acidic dipeptidase 2     | -1.06 |
| PLEKHA4      | pleckstrin homology domain containing A4           | -1.06 |

|               |                                                           |       |
|---------------|-----------------------------------------------------------|-------|
| SYTL1         | synaptotagmin like 1                                      | -1.06 |
| TYROBP        | transmembrane immune signaling adaptor TYROBP             | -1.06 |
| ZNF430        | zinc finger protein 430                                   | -1.06 |
| C3AR1         | complement C3a receptor 1                                 | -1.07 |
| GLIDR         | glioblastoma down-regulated RNA                           | -1.07 |
| HAVCR2        | hepatitis A virus cellular receptor 2                     | -1.07 |
| IFT57         | intraflagellar transport 57                               | -1.07 |
| LDHA          | lactate dehydrogenase A                                   | -1.07 |
| LGI4          | leucine rich repeat LGI family member 4                   | -1.07 |
| LINC01123     | long intergenic non-protein coding RNA 1123               | -1.07 |
| LONRF1        | LON peptidase N-terminal domain and ring finger 1         | -1.07 |
| MAFK          | MAF bZIP transcription factor K                           | -1.07 |
| MYO1E         | myosin IE                                                 | -1.07 |
| RNASE6        | ribonuclease A family member k6                           | -1.07 |
| SIGLEC1       | sialic acid binding Ig like lectin 1                      | -1.07 |
| SPRY4         | sprouty RTK signaling antagonist 4                        | -1.07 |
| THSD4         | thrombospondin type 1 domain containing 4                 | -1.07 |
| TLR4          | toll like receptor 4                                      | -1.07 |
| TUBA1A        | tubulin alpha 1a                                          | -1.07 |
| ARAP2         | ArfGAP with RhoGAP domain, ankyrin repeat and PH domain 2 | -1.08 |
| CPED1         | cadherin like and PC-esterase domain containing 1         | -1.08 |
| DLC1          | DLC1 Rho GTPase activating protein                        | -1.08 |
| DNALI1        | dynein axonemal light intermediate chain 1                | -1.08 |
| DOC2A         | double C2 domain alpha                                    | -1.08 |
| ELF4          | E74 like ETS transcription factor 4                       | -1.08 |
| FCHSD1        | FCH and double SH3 domains 1                              | -1.08 |
| FRMD6         | FERM domain containing 6                                  | -1.08 |
| FZD8          | frizzled class receptor 8                                 | -1.08 |
| GPRC5B        | G protein-coupled receptor class C group 5 member B       | -1.08 |
| LILRB3        | leukocyte immunoglobulin like receptor B3                 | -1.08 |
| MT-ND6        | NADH dehydrogenase, subunit 6 (complex I)                 | -1.08 |
| SDC3          | syndecan 3                                                | -1.08 |
| STING1        | stimulator of interferon response cGAMP interactor 1      | -1.08 |
| TMEM51        | transmembrane protein 51                                  | -1.08 |
| TNFRSF10A-AS1 |                                                           | -1.08 |
| WEE1          | WEE1 G2 checkpoint kinase                                 | -1.08 |
| CA13          | carbonic anhydrase 13                                     | -1.09 |
| CHSY1         | chondroitin sulfate synthase 1                            | -1.09 |
| CXorf21       | chromosome X open reading frame 21                        | -1.09 |
| DCHS1         | dachsous cadherin-related 1                               | -1.09 |
| FCER1G        | Fc fragment of IgE receptor Ig                            | -1.09 |
| FOLR2         | folate receptor beta                                      | -1.09 |
| GATA6         | GATA binding protein 6                                    | -1.09 |
| KRT8P3        | keratin 8 pseudogene 3                                    | -1.09 |
| LCA5          | lebercilin LCA5                                           | -1.09 |
| OSBPL5        | oxysterol binding protein like 5                          | -1.09 |
| PARP8         | poly(ADP-ribose) polymerase family member 8               | -1.09 |
| SELENOW       | selenoprotein W                                           | -1.09 |
| TEX14         | testis expressed 14, intercellular bridge forming factor  | -1.09 |
| TNFRSF10A     | TNF receptor superfamily member 10a                       | -1.09 |
| TPK1          | thiamin pyrophosphokinase 1                               | -1.09 |
| ZEB2          | zinc finger E-box binding homeobox 2                      | -1.09 |
| CD55          | CD55 molecule (Cromer blood group)                        | -1.1  |
| DDR2          | discoidin domain receptor tyrosine kinase 2               | -1.1  |
| DGKA          | diacylglycerol kinase alpha                               | -1.1  |
| EVA1C         | eva-1 homolog C                                           | -1.1  |
| GK            | glycerol kinase                                           | -1.1  |



|                   |                                                                        |       |
|-------------------|------------------------------------------------------------------------|-------|
| LILRA6            | leukocyte immunoglobulin like receptor A6                              | -1.1  |
| LIMCH1            | LIM and calponin homology domains 1                                    | -1.1  |
| LRRC25            | leucine rich repeat containing 25                                      | -1.1  |
| TSPAN12           | tetraspanin 12                                                         | -1.1  |
| ANTXR2            | ANTXR cell adhesion molecule 2                                         | -1.11 |
| BTK               | Bruton tyrosine kinase                                                 | -1.11 |
| CCDC38            | coiled-coil domain containing 38                                       | -1.11 |
| CD72              | CD72 molecule                                                          | -1.11 |
| CHST7             | carbohydrate sulfotransferase 7                                        | -1.11 |
| CRYM              | crystallin mu                                                          | -1.11 |
| FLRT3             | fibronectin leucine rich transmembrane protein 3                       | -1.11 |
| GFAP              | glial fibrillary acidic protein                                        | -1.11 |
| IL2RB             | interleukin 2 receptor subunit beta                                    | -1.11 |
| JUN               | Jun proto-oncogene, AP-1 transcription factor subunit                  | -1.11 |
| KDM6B             | lysine demethylase 6B                                                  | -1.11 |
| KRT8              | keratin 8                                                              | -1.11 |
| LAPTM5            | lysosomal protein transmembrane 5                                      | -1.11 |
| LINC00987         | long intergenic non-protein coding RNA 987                             | -1.11 |
| PIK3CD            | phosphatidylinositol-4,5-bisphosphate 3-kinase catalytic subunit delta | -1.11 |
| PTGS1             | prostaglandin-endoperoxide synthase 1                                  | -1.11 |
| RCAN1             | regulator of calcineurin 1                                             | -1.11 |
| SEMA6D            | semaphorin 6D                                                          | -1.11 |
| TMEM47            | transmembrane protein 47                                               | -1.11 |
| VENTX             | VENT homeobox                                                          | -1.11 |
| ADGRG1            | adhesion G protein-coupled receptor G1                                 | -1.12 |
| ARMCX6            | armadillo repeat containing X-linked 6                                 | -1.12 |
| DENND2D           | DENN domain containing 2D                                              | -1.12 |
| GALC              | galactosylceramidase                                                   | -1.12 |
| GLYATL1           | glycine-N-acyltransferase like 1                                       | -1.12 |
| GPRASP1           | G protein-coupled receptor associated sorting protein 1                | -1.12 |
| ID2               | inhibitor of DNA binding 2                                             | -1.12 |
| KLF2              | Kruppel like factor 2                                                  | -1.12 |
| KLF6              | Kruppel like factor 6                                                  | -1.12 |
| KLRC4-KLRK1/KLRK1 | killer cell lectin like receptor K1                                    | -1.12 |
| KRT8P45           | keratin 8 pseudogene 45                                                | -1.12 |
| PIM2              | Pim-2 proto-oncogene, serine/threonine kinase                          | -1.12 |
| RP11_171I22       |                                                                        | -1.12 |
| STAB1             | stabilin 1                                                             | -1.12 |
| BCL11B            | BAF chromatin remodeling complex subunit BCL11B                        | -1.13 |
| ERRF1             | ERBB receptor feedback inhibitor 1                                     | -1.13 |
| KDM8              | lysine demethylase 8                                                   | -1.13 |
| LONRF2            | LON peptidase N-terminal domain and ring finger 2                      | -1.13 |
| PTAFR             | platelet activating factor receptor                                    | -1.13 |
| ARHGAP9           | Rho GTPase activating protein 9                                        | -1.14 |
| DPEP2             | dipeptidase 2                                                          | -1.14 |
| HHIPL1            | HHIP like 1                                                            | -1.14 |
| HLA-DRB1          | major histocompatibility complex, class II, DR beta 1                  | -1.14 |
| ITPRIP            | inositol 1,4,5-trisphosphate receptor interacting protein              | -1.14 |
| MCOLN2            | mucolipin 2                                                            | -1.14 |
| PIM3              | Pim-3 proto-oncogene, serine/threonine kinase                          | -1.14 |
| RP3_453C1214      |                                                                        | -1.14 |
| S100A4            | S100 calcium binding protein A4                                        | -1.14 |
| SEPTIN1           | septin 1                                                               | -1.14 |
| ZNF506            | zinc finger protein 506                                                | -1.14 |
| ADM               | adrenomedullin                                                         | -1.15 |
| BEAN1             | brain expressed associated with NEDD4 1                                | -1.15 |
| CCL14             | C-C motif chemokine ligand 14                                          | -1.15 |

|               |                                                               |       |
|---------------|---------------------------------------------------------------|-------|
| CLEC10A       | C-type lectin domain containing 10A                           | -1.15 |
| FYB1          | FYN binding protein 1                                         | -1.15 |
| GMFG          | glia maturation factor gamma                                  | -1.15 |
| HERC5         | HECT and RLD domain containing E3 ubiquitin protein ligase 5  | -1.15 |
| HLA-DPA1      | major histocompatibility complex, class II, DP alpha 1        | -1.15 |
| LEAP2         | liver enriched antimicrobial peptide 2                        | -1.15 |
| MEAK7         | MTOR associated protein, eak-7 homolog                        | -1.15 |
| NCKAP1L       | NCK associated protein 1 like                                 | -1.15 |
| PEMT          | phosphatidylethanolamine N-methyltransferase                  | -1.15 |
| PPP1R3D       | protein phosphatase 1 regulatory subunit 3D                   | -1.15 |
| SFMBT2        | Scm like with four mbt domains 2                              | -1.15 |
| TECTA         | tectorin alpha                                                | -1.15 |
| TRABD2B       | TraB domain containing 2B                                     | -1.15 |
| VSIR          | V-set immunoregulatory receptor                               | -1.15 |
| AK4           | adenylate kinase 4                                            | -1.16 |
| ARHGEF26      | Rho guanine nucleotide exchange factor 26                     | -1.16 |
| BIN2          | bridging integrator 2                                         | -1.16 |
| CD7           | CD7 molecule                                                  | -1.16 |
| CHIC1         | cysteine rich hydrophobic domain 1                            | -1.16 |
| FCGR3A/FCGR3B | Fc fragment of IgG receptor IIIa                              | -1.16 |
| FES           | FES proto-oncogene, tyrosine kinase                           | -1.16 |
| HRH2          | histamine receptor H2                                         | -1.16 |
| LETM2         | leucine zipper and EF-hand containing transmembrane protein 2 | -1.16 |
| PRDM1         | PR/SET domain 1                                               | -1.16 |
| RASSF2        | Ras association domain family member 2                        | -1.16 |
| ZNF549        | zinc finger protein 549                                       | -1.16 |
| ACSBG1        | acyl-CoA synthetase bubblegum family member 1                 | -1.17 |
| CAB39L        | calcium binding protein 39 like                               | -1.17 |
| CCDC3         | coiled-coil domain containing 3                               | -1.17 |
| CD83          | CD83 molecule                                                 | -1.17 |
| GCSAM         | germinal center associated signaling and motility             | -1.17 |
| HLA-DRA       | major histocompatibility complex, class II, DR alpha          | -1.17 |
| IL4R          | interleukin 4 receptor                                        | -1.17 |
| MS4A4A        | membrane spanning 4-domains A4A                               | -1.17 |
| NKX3-1        | NK3 homeobox 1                                                | -1.17 |
| NXPE3         | neurexophilin and PC-esterase domain family member 3          | -1.17 |
| RASGRP4       | RAS guanyl releasing protein 4                                | -1.17 |
| RIPK3         | receptor interacting serine/threonine kinase 3                | -1.17 |
| ZNF462        | zinc finger protein 462                                       | -1.17 |
| ZNF630        | zinc finger protein 630                                       | -1.17 |
| CCL5          | C-C motif chemokine ligand 5                                  | -1.18 |
| LPIN2         | lipin 2                                                       | -1.18 |
| NFIL3         | nuclear factor, interleukin 3 regulated                       | -1.18 |
| RAB31         | RAB31, member RAS oncogene family                             | -1.18 |
| RP1_232L22_B1 |                                                               | -1.18 |
| SEMA6A        | semaphorin 6A                                                 | -1.18 |
| SLC7A8        | solute carrier family 7 member 8                              | -1.18 |
| SPRY2         | sprouty RTK signaling antagonist 2                            | -1.18 |
| SULT1A1       | sulfotransferase family 1A member 1                           | -1.18 |
| TMC6          | transmembrane channel like 6                                  | -1.18 |
| VPS37B        | VPS37B subunit of ESCRT-I                                     | -1.18 |
| AMD1          | adenosylmethionine decarboxylase 1                            | -1.19 |
| APBA1         | amyloid beta precursor protein binding family A member 1      | -1.19 |
| C1QA          | complement C1q A chain                                        | -1.19 |
| CD274         | CD274 molecule                                                | -1.19 |
| CD53          | CD53 molecule                                                 | -1.19 |
| CYBB          | cytochrome b-245 beta chain                                   | -1.19 |

|              |                                                                 |       |
|--------------|-----------------------------------------------------------------|-------|
| HCK          | HCK proto-oncogene, Src family tyrosine kinase                  | -1.19 |
| HLA-DQA1     | major histocompatibility complex, class II, DQ alpha 1          | -1.19 |
| LOC100506585 | uncharacterized LOC100506585                                    | -1.19 |
| OXCT1        | 3-oxoacid CoA-transferase 1                                     | -1.19 |
| PHC1P1       | polyhomeotic homolog 1 pseudogene 1                             | -1.19 |
| SH3BGRL      | SH3 domain binding glutamate rich protein like                  | -1.19 |
| SLC17A3      | solute carrier family 17 member 3                               | -1.19 |
| VAV1         | vav guanine nucleotide exchange factor 1                        | -1.19 |
| AC016831.7   |                                                                 | -1.2  |
| CALHM6       | calcium homeostasis modulator family member 6                   | -1.2  |
| CD27         | CD27 molecule                                                   | -1.2  |
| COL9A3       | collagen type IX alpha 3 chain                                  | -1.2  |
| CYP2C9       | cytochrome P450 family 2 subfamily C member 9                   | -1.2  |
| DOCK2        | dedicator of cytokinesis 2                                      | -1.2  |
| GCA          | grancalcin                                                      | -1.2  |
| GPSM3        | G protein signaling modulator 3                                 | -1.2  |
| HLA-DPB1     | major histocompatibility complex, class II, DP beta 1           | -1.2  |
| IL10RA       | interleukin 10 receptor subunit alpha                           | -1.2  |
| MASP1        | mannan binding lectin serine peptidase 1                        | -1.2  |
| PDCD1LG2     | programmed cell death 1 ligand 2                                | -1.2  |
| PHETA2       | PH domain containing endocytic trafficking adaptor 2            | -1.2  |
| PLCG2        | phospholipase C gamma 2                                         | -1.2  |
| RP11_750H95  |                                                                 | -1.2  |
| SELPLG       | selectin P ligand                                               | -1.2  |
| STK31        | serine/threonine kinase 31                                      | -1.2  |
| TIPARP       | TCDD inducible poly(ADP-ribose) polymerase                      | -1.2  |
| TRIM22       | tripartite motif containing 22                                  | -1.2  |
| CCNJ         | cyclin J                                                        | -1.21 |
| DYNC2H1      | dynein cytoplasmic 2 heavy chain 1                              | -1.21 |
| FUZ          | fuzzy planar cell polarity protein                              | -1.21 |
| GAREM1       | GRB2 associated regulator of MAPK1 subtype 1                    | -1.21 |
| KLF7         | Kruppel like factor 7                                           | -1.21 |
| LCP2         | lymphocyte cytosolic protein 2                                  | -1.21 |
| LOC101927668 | uncharacterized LOC101927668                                    | -1.21 |
| LY86         | lymphocyte antigen 86                                           | -1.21 |
| NCF1C        | neutrophil cytosolic factor 1C pseudogene                       | -1.21 |
| RGS18        | regulator of G protein signaling 18                             | -1.21 |
| RHOH         | ras homolog family member H                                     | -1.21 |
| TMC8         | transmembrane channel like 8                                    | -1.21 |
| TMEM139      | transmembrane protein 139                                       | -1.21 |
| BEGAIN       | brain enriched guanylate kinase associated                      | -1.22 |
| CARD11       | caspase recruitment domain family member 11                     | -1.22 |
| ITGA3        | integrin subunit alpha 3                                        | -1.22 |
| ITGA4        | integrin subunit alpha 4                                        | -1.22 |
| LINC00865    | long intergenic non-protein coding RNA 865                      | -1.22 |
| LINC02037    | long intergenic non-protein coding RNA 2037                     | -1.22 |
| LRRK1        | leucine rich repeat kinase 1                                    | -1.22 |
| MTND6P4      |                                                                 | -1.22 |
| MYO1F        | myosin IF                                                       | -1.22 |
| PPP1R3B      | protein phosphatase 1 regulatory subunit 3B                     | -1.22 |
| SDC4         | syndecan 4                                                      | -1.22 |
| SLC27A2      | solute carrier family 27 member 2                               | -1.22 |
| SPOCK2       | SPARC (osteonectin), cwcv and kazal like domains proteoglycan 2 | -1.22 |
| STK17B       | serine/threonine kinase 17b                                     | -1.22 |
| TENT5A       | terminal nucleotidyltransferase 5A                              | -1.22 |
| TIMP2        | TIMP metalloproteinase inhibitor 2                              | -1.22 |
| TTN          | titin                                                           | -1.22 |

|              |                                                                           |       |
|--------------|---------------------------------------------------------------------------|-------|
| USP2         | ubiquitin specific peptidase 2                                            | -1.22 |
| ABCA8        | ATP binding cassette subfamily A member 8                                 | -1.23 |
| ARID5A       | AT-rich interaction domain 5A                                             | -1.23 |
| C1QC         | complement C1q C chain                                                    | -1.23 |
| CDC42EP2     | CDC42 effector protein 2                                                  | -1.23 |
| CPM          | carboxypeptidase M                                                        | -1.23 |
| GNA15        | G protein subunit alpha 15                                                | -1.23 |
| KCNK6        | potassium two pore domain channel subfamily K member 6                    | -1.23 |
| LDHB         | lactate dehydrogenase B                                                   | -1.23 |
| PNRC1        | proline rich nuclear receptor coactivator 1                               | -1.23 |
| SLFNL1       | schlafen like 1                                                           | -1.23 |
| SRPX2        | sushi repeat containing protein X-linked 2                                | -1.23 |
| TNFRSF1B     | TNF receptor superfamily member 1B                                        | -1.23 |
| B3GALT4      | beta-1,3-galactosyltransferase 4                                          | -1.24 |
| CARMIL2      | capping protein regulator and myosin 1 linker 2                           | -1.24 |
| CCL3         | C-C motif chemokine ligand 3                                              | -1.24 |
| CD244        | CD244 molecule                                                            | -1.24 |
| CD6          | CD6 molecule                                                              | -1.24 |
| CHST9        | carbohydrate sulfotransferase 9                                           | -1.24 |
| HCG11        | HLA complex group 11                                                      | -1.24 |
| IKZF3        | IKAROS family zinc finger 3                                               | -1.24 |
| LAT2         | linker for activation of T cells family member 2                          | -1.24 |
| LY75         | lymphocyte antigen 75                                                     | -1.24 |
| NMUR1        | neuromedin U receptor 1                                                   | -1.24 |
| ADGRE5       | adhesion G protein-coupled receptor E5                                    | -1.25 |
| AHSG         | alpha 2-HS glycoprotein                                                   | -1.25 |
| ARHGAP10     | Rho GTPase activating protein 10                                          | -1.25 |
| BHLHE40      | basic helix-loop-helix family member e40                                  | -1.25 |
| CDKN1C       | cyclin dependent kinase inhibitor 1C                                      | -1.25 |
| CELF2        | CUGBP Elav-like family member 2                                           | -1.25 |
| DAB1         | DAB adaptor protein 1                                                     | -1.25 |
| DOCK10       | dedicator of cytokinesis 10                                               | -1.25 |
| HPS5         | HPS5 biogenesis of lysosomal organelles complex 2 subunit 2               | -1.25 |
| HSPA4L       | heat shock protein family A (Hsp70) member 4 like                         | -1.25 |
| NLRC4        | NLR family CARD domain containing 4                                       | -1.25 |
| ORM1         | orosomuroid 1                                                             | -1.25 |
| POLR1E       | RNA polymerase I subunit E                                                | -1.25 |
| RP11-186B7.4 |                                                                           | -1.25 |
| SLC16A4      | solute carrier family 16 member 4                                         | -1.25 |
| SLC25A36     | solute carrier family 25 member 36                                        | -1.25 |
| TNRC6C-AS1   |                                                                           | -1.25 |
| ATP2A3       | ATPase sarcoplasmic/endoplasmic reticulum Ca <sup>2+</sup> transporting 3 | -1.26 |
| C8B          | complement C8 beta chain                                                  | -1.26 |
| CDKN1A       | cyclin dependent kinase inhibitor 1A                                      | -1.26 |
| FETUB        | fetuin B                                                                  | -1.26 |
| FGA          | fibrinogen alpha chain                                                    | -1.26 |
| FNDC4        | fibronectin type III domain containing 4                                  | -1.26 |
| IKZF1        | IKAROS family zinc finger 1                                               | -1.26 |
| MPEG1        | macrophage expressed 1                                                    | -1.26 |
| PLXNB3       | plexin B3                                                                 | -1.26 |
| PPIEL        | peptidylprolyl isomerase E like pseudogene                                | -1.26 |
| RAB3IL1      | RAB3A interacting protein like 1                                          | -1.26 |
| RASGEF1B     | RasGEF domain family member 1B                                            | -1.26 |
| SERPINA3     | serpin family A member 3                                                  | -1.26 |
| SIGLEC9      | sialic acid binding Ig like lectin 9                                      | -1.26 |
| C1QB         | complement C1q B chain                                                    | -1.27 |
| C1R          | complement C1r                                                            | -1.27 |

|              |                                                                       |       |
|--------------|-----------------------------------------------------------------------|-------|
| CD14         | CD14 molecule                                                         | -1.27 |
| CD8A         | CD8a molecule                                                         | -1.27 |
| CHRM3-AS2    | CHRM3 antisense RNA 2                                                 | -1.27 |
| CSF2RB       | colony stimulating factor 2 receptor subunit beta                     | -1.27 |
| CST7         | cystatin F                                                            | -1.27 |
| ENTPD8       | ectonucleoside triphosphate diphosphohydrolase 8                      | -1.27 |
| HCLS1        | hematopoietic cell-specific Lyn substrate 1                           | -1.27 |
| KIAA0408     | KIAA0408                                                              | -1.27 |
| MGAT3        | beta-1,4-mannosyl-glycoprotein 4-beta-N-acetylglucosaminyltransferase | -1.27 |
| NAALADL2     | N-acetylated alpha-linked acidic dipeptidase like 2                   | -1.27 |
| PWAR5        | Prader Willi/Angelman region RNA 5                                    | -1.27 |
| RARG         | retinoic acid receptor gamma                                          | -1.27 |
| RSPH4A       | radial spoke head component 4A                                        | -1.27 |
| SERP2        | stress associated endoplasmic reticulum protein family member 2       | -1.27 |
| STMN3        | stathmin 3                                                            | -1.27 |
| AGPAT2       | 1-acylglycerol-3-phosphate O-acyltransferase 2                        | -1.28 |
| CD48         | CD48 molecule                                                         | -1.28 |
| EGFR-AS1     | EGFR antisense RNA 1                                                  | -1.28 |
| GABARAPL1    | GABA type A receptor associated protein like 1                        | -1.28 |
| GP1BA        | glycoprotein Ib platelet subunit alpha                                | -1.28 |
| MAP2K3       | mitogen-activated protein kinase kinase 3                             | -1.28 |
| MBNL2        | muscleblind like splicing regulator 2                                 | -1.28 |
| NDRG2        | NDRG family member 2                                                  | -1.28 |
| PPP1R16B     | protein phosphatase 1 regulatory subunit 16B                          | -1.28 |
| RASGRP1      | RAS guanyl releasing protein 1                                        | -1.28 |
| RTL8B        | retrotransposon Gag like 8B                                           | -1.28 |
| SEMA4D       | semaphorin 4D                                                         | -1.28 |
| SYK          | spleen associated tyrosine kinase                                     | -1.28 |
| TF           | transferrin                                                           | -1.28 |
| USP51        | ubiquitin specific peptidase 51                                       | -1.28 |
| ANXA4        | annexin A4                                                            | -1.29 |
| CYP4A22      | cytochrome P450 family 4 subfamily A member 22                        | -1.29 |
| FCGBP        | Fc fragment of IgG binding protein                                    | -1.29 |
| ID3          | inhibitor of DNA binding 3, HLH protein                               | -1.29 |
| SLC25A15     | solute carrier family 25 member 15                                    | -1.29 |
| UGT1A1       | UDP glucuronosyltransferase family 1 member A1                        | -1.29 |
| WTIP         | WT1 interacting protein                                               | -1.29 |
| AKAP7        | A-kinase anchoring protein 7                                          | -1.3  |
| ALDH1B1      | aldehyde dehydrogenase 1 family member B1                             | -1.3  |
| BDH2         | 3-hydroxybutyrate dehydrogenase 2                                     | -1.3  |
| CTBP2        | C-terminal binding protein 2                                          | -1.3  |
| CTD_2562J176 |                                                                       | -1.3  |
| KCNQ1        | potassium voltage-gated channel subfamily Q member 1                  | -1.3  |
| NOVA1        | NOVA alternative splicing regulator 1                                 | -1.3  |
| RIPK4        | receptor interacting serine/threonine kinase 4                        | -1.3  |
| S1PR3        | sphingosine-1-phosphate receptor 3                                    | -1.3  |
| TNFSF13B     | TNF superfamily member 13b                                            | -1.3  |
| ZNF287       | zinc finger protein 287                                               | -1.3  |
| AMIGO2       | adhesion molecule with Ig like domain 2                               | -1.31 |
| CD180        | CD180 molecule                                                        | -1.31 |
| IPCEF1       | interaction protein for cytohesin exchange factors 1                  | -1.31 |
| PDE1B        | phosphodiesterase 1B                                                  | -1.31 |
| PDE4D        | phosphodiesterase 4D                                                  | -1.31 |
| PTPN22       | protein tyrosine phosphatase non-receptor type 22                     | -1.31 |
| SLC38A2      | solute carrier family 38 member 2                                     | -1.31 |
| CD8B         | CD8b molecule                                                         | -1.32 |
| CUBN         | cubilin                                                               | -1.32 |

|             |                                                                       |       |
|-------------|-----------------------------------------------------------------------|-------|
| DIO1        | iodothyronine deiodinase 1                                            | -1.32 |
| HPSE        | heparanase                                                            | -1.32 |
| ISYNA1      | inositol-3-phosphate synthase 1                                       | -1.32 |
| MBOAT2      | membrane bound O-acyltransferase domain containing 2                  | -1.32 |
| NFKBIZ      | NFKB inhibitor zeta                                                   | -1.32 |
| S1PR4       | sphingosine-1-phosphate receptor 4                                    | -1.32 |
| SLCO1B1     | solute carrier organic anion transporter family member 1B1            | -1.32 |
| SMAD9       | SMAD family member 9                                                  | -1.32 |
| SYNE1       | spectrin repeat containing nuclear envelope protein 1                 | -1.32 |
| TSPAN11     | tetraspanin 11                                                        | -1.32 |
| XDH         | xanthine dehydrogenase                                                | -1.32 |
| ATP8B4      | ATPase phospholipid transporting 8B4 (putative)                       | -1.33 |
| CD79B       | CD79b molecule                                                        | -1.33 |
| CD96        | CD96 molecule                                                         | -1.33 |
| FAM229B     | family with sequence similarity 229 member B                          | -1.33 |
| GNG2        | G protein subunit gamma 2                                             | -1.33 |
| LPAR5       | lysophosphatidic acid receptor 5                                      | -1.33 |
| NCF1        | neutrophil cytosolic factor 1                                         | -1.33 |
| PRAM1       | PML-RARA regulated adaptor molecule 1                                 | -1.33 |
| SDR42E1     | short chain dehydrogenase/reductase family 42E, member 1              | -1.33 |
| SLA2        | Src like adaptor 2                                                    | -1.33 |
| SLFN11      | schlafen family member 11                                             | -1.33 |
| SPATA6L     | spermatogenesis associated 6 like                                     | -1.33 |
| TES         | testin LIM domain protein                                             | -1.33 |
| ZNF702P     | zinc finger protein 702, pseudogene                                   | -1.33 |
| ACSL1       | acyl-CoA synthetase long chain family member 1                        | -1.34 |
| CERKL       | ceramide kinase like                                                  | -1.34 |
| DNAJA4      | DnaJ heat shock protein family (Hsp40) member A4                      | -1.34 |
| FEZ1        | fasciculation and elongation protein zeta 1                           | -1.34 |
| GRAMD1C     | GRAM domain containing 1C                                             | -1.34 |
| IL15RA      | interleukin 15 receptor subunit alpha                                 | -1.34 |
| KYNU        | kynureninase                                                          | -1.34 |
| OSBPL10     | oxysterol binding protein like 10                                     | -1.34 |
| PDE4A       | phosphodiesterase 4A                                                  | -1.34 |
| RAB27B      | RAB27B, member RAS oncogene family                                    | -1.34 |
| SLAMF7      | SLAM family member 7                                                  | -1.34 |
| TUBE1       | tubulin epsilon 1                                                     | -1.34 |
| UPP1        | uridine phosphorylase 1                                               | -1.34 |
| AIM2        | absent in melanoma 2                                                  | -1.35 |
| AKR7A3      | aldo-keto reductase family 7 member A3                                | -1.35 |
| ALPL        | alkaline phosphatase, biomineralization associated                    | -1.35 |
| CCDC71L     | coiled-coil domain containing 71 like                                 | -1.35 |
| CD5         | CD5 molecule                                                          | -1.35 |
| CYP4A11     | cytochrome P450 family 4 subfamily A member 11                        | -1.35 |
| EBI3        | Epstein-Barr virus induced 3                                          | -1.35 |
| EVI2B       | ecotropic viral integration site 2B                                   | -1.35 |
| GLDCP1      | glycine decarboxylase pseudogene 1                                    | -1.35 |
| HK3         | hexokinase 3                                                          | -1.35 |
| INTS6L      | integrator complex subunit 6 like                                     | -1.35 |
| KCNAB3      | potassium voltage-gated channel subfamily A regulatory beta subunit 3 | -1.35 |
| MEFV        | MEFV innate immunity regulator, pyrin                                 | -1.35 |
| PCP4L1      | Purkinje cell protein 4 like 1                                        | -1.35 |
| PIWIL4      | piwi like RNA-mediated gene silencing 4                               | -1.35 |
| RAPGEF5     | Rap guanine nucleotide exchange factor 5                              | -1.35 |
| RNF125      | ring finger protein 125                                               | -1.35 |
| RP11_823E83 |                                                                       | -1.35 |
| UGCG        | UDP-glucose ceramide glucosyltransferase                              | -1.35 |

|              |                                                                 |       |
|--------------|-----------------------------------------------------------------|-------|
| ULK2         | unc-51 like autophagy activating kinase 2                       | -1.35 |
| ADSS1        | adenylosuccinate synthase 1                                     | -1.36 |
| C8orf31      | chromosome 8 open reading frame 31                              | -1.36 |
| CROCC2       | ciliary rootlet coiled-coil, rootletin family member 2          | -1.36 |
| DAPP1        | dual adaptor of phosphotyrosine and 3-phosphoinositides 1       | -1.36 |
| KLHL6        | kelch like family member 6                                      | -1.36 |
| LBP          | lipopolysaccharide binding protein                              | -1.36 |
| PDE2A        | phosphodiesterase 2A                                            | -1.36 |
| PIP4P2       | phosphatidylinositol-4,5-bisphosphate 4-phosphatase 2           | -1.36 |
| AQP3         | aquaporin 3 (Gill blood group)                                  | -1.37 |
| CBARP        | CACN subunit beta associated regulatory protein                 | -1.37 |
| CD226        | CD226 molecule                                                  | -1.37 |
| CD300C       | CD300c molecule                                                 | -1.37 |
| CDHR1        | cadherin related family member 1                                | -1.37 |
| FUT3         | fucosyltransferase 3 (Lewis blood group)                        | -1.37 |
| PGM5         | phosphoglucomutase 5                                            | -1.37 |
| PPARGC1A     | PPARG coactivator 1 alpha                                       | -1.37 |
| RASA3        | RAS p21 protein activator 3                                     | -1.37 |
| SLAMF6       | SLAM family member 6                                            | -1.37 |
| SLC16A5      | solute carrier family 16 member 5                               | -1.37 |
| SLC25A24     | solute carrier family 25 member 24                              | -1.37 |
| STON1        | stonin 1                                                        | -1.37 |
| TAF4B        | TATA-box binding protein associated factor 4b                   | -1.37 |
| TAMALIN      | trafficking regulator and scaffold protein tamalin              | -1.37 |
| WDFY3-AS2    | WDFY3 antisense RNA 2                                           | -1.37 |
| ASL          | argininosuccinate lyase                                         | -1.38 |
| CCR1         | C-C motif chemokine receptor 1                                  | -1.38 |
| CCR7         | C-C motif chemokine receptor 7                                  | -1.38 |
| CD22         | CD22 molecule                                                   | -1.38 |
| EPOP         | elongin BC and polycomb repressive complex 2 associated protein | -1.38 |
| GPR180       | G protein-coupled receptor 180                                  | -1.38 |
| IL1RAP       | interleukin 1 receptor accessory protein                        | -1.38 |
| KIAA0040     | KIAA0040                                                        | -1.38 |
| MAN1C1       | mannosidase alpha class 1C member 1                             | -1.38 |
| PDE4B        | phosphodiesterase 4B                                            | -1.38 |
| PLPP3        | phospholipid phosphatase 3                                      | -1.38 |
| PON3         | paraoxonase 3                                                   | -1.38 |
| RASSF6       | Ras association domain family member 6                          | -1.38 |
| STEAP3       | STEAP3 metalloredutase                                          | -1.38 |
| ADGRG6       | adhesion G protein-coupled receptor G6                          | -1.39 |
| ANGPTL3      | angiopoietin like 3                                             | -1.39 |
| APBA2        | amyloid beta precursor protein binding family A member 2        | -1.39 |
| CFD          | complement factor D                                             | -1.39 |
| FPR3         | formyl peptide receptor 3                                       | -1.39 |
| HNF1B        | HNF1 homeobox B                                                 | -1.39 |
| KIF26A       | kinesin family member 26A                                       | -1.39 |
| KLRB1        | killer cell lectin like receptor B1                             | -1.39 |
| PTPRC        | protein tyrosine phosphatase receptor type C                    | -1.39 |
| RGS1         | regulator of G protein signaling 1                              | -1.39 |
| RP11_250B26  |                                                                 | -1.39 |
| RP5_1086K131 |                                                                 | -1.39 |
| SH2D2A       | SH2 domain containing 2A                                        | -1.39 |
| SLC9A9       | solute carrier family 9 member A9                               | -1.39 |
| SPIRE1       | spire type actin nucleation factor 1                            | -1.39 |
| TOR4A        | torsin family 4 member A                                        | -1.39 |
| AOAH         | acyloxyacyl hydrolase                                           | -1.4  |
| CH507_42P116 |                                                                 | -1.4  |

|                         |                                                                                                      |       |
|-------------------------|------------------------------------------------------------------------------------------------------|-------|
| CYBA                    | cytochrome b-245 alpha chain                                                                         | -1.4  |
| EMB                     | embigin                                                                                              | -1.4  |
| EVI2A                   | ecotropic viral integration site 2A                                                                  | -1.4  |
| GATA3                   | GATA binding protein 3                                                                               | -1.4  |
| LINC01237               | long intergenic non-protein coding RNA 1237                                                          | -1.4  |
| ORM2                    | orosomuroid 2                                                                                        | -1.4  |
| P2RY1                   | purinergic receptor P2Y1                                                                             | -1.4  |
| PIK3R5                  | phosphoinositide-3-kinase regulatory subunit 5                                                       | -1.4  |
| PPP2R3A                 | protein phosphatase 2 regulatory subunit B"alpha                                                     | -1.4  |
| RP11_1094M148           |                                                                                                      | -1.4  |
| SMIM6                   | small integral membrane protein 6                                                                    | -1.4  |
| CXCR2P1                 | C-X-C motif chemokine receptor 2 pseudogene 1                                                        | -1.41 |
| FGD3                    | FYVE, RhoGEF and PH domain containing 3                                                              | -1.41 |
| GPC1                    | glypican 1                                                                                           | -1.41 |
| MAGEH1                  | MAGE family member H1                                                                                | -1.41 |
| MTHFD2                  | methylenetetrahydrofolate dehydrogenase (NADP+ dependent) 2, methenyltetrahydrofolate cyclohydrolase | -1.41 |
| PLTP                    | phospholipid transfer protein                                                                        | -1.41 |
| RANBP17                 | RAN binding protein 17                                                                               | -1.41 |
| SLC28A1                 | solute carrier family 28 member 1                                                                    | -1.41 |
| TBXAS1                  | thromboxane A synthase 1                                                                             | -1.41 |
| AGAP6 (includes others) | ArfGAP with GTPase domain, ankyrin repeat and PH domain 4                                            | -1.42 |
| AKAP12                  | A-kinase anchoring protein 12                                                                        | -1.42 |
| AZGP1                   | alpha-2-glycoprotein 1, zinc-binding                                                                 | -1.42 |
| CASS4                   | Cas scaffold protein family member 4                                                                 | -1.42 |
| CLEC7A                  | C-type lectin domain containing 7A                                                                   | -1.42 |
| CNRIP1                  | cannabinoid receptor interacting protein 1                                                           | -1.42 |
| FUT4                    | fucosyltransferase 4                                                                                 | -1.42 |
| GALNT14                 | polypeptide N-acetylgalactosaminyltransferase 14                                                     | -1.42 |
| INHBE                   | inhibin subunit beta E                                                                               | -1.42 |
| JUNB                    | JunB proto-oncogene, AP-1 transcription factor subunit                                               | -1.42 |
| LILRB1                  | leukocyte immunoglobulin like receptor B1                                                            | -1.42 |
| LINC01934               | long intergenic non-protein coding RNA 1934                                                          | -1.42 |
| NCF1B                   | neutrophil cytosolic factor 1B pseudogene                                                            | -1.42 |
| NIPAL1                  | NIPA like domain containing 1                                                                        | -1.42 |
| RERG                    | RAS like estrogen regulated growth inhibitor                                                         | -1.42 |
| SCNN1A                  | sodium channel epithelial 1 subunit alpha                                                            | -1.42 |
| TIGIT                   | T cell immunoreceptor with Ig and ITIM domains                                                       | -1.42 |
| TNIK                    | TRAF2 and NCK interacting kinase                                                                     | -1.42 |
| UNC5C                   | unc-5 netrin receptor C                                                                              | -1.42 |
| ARHGEF26-AS1            | ARHGEF26 antisense RNA 1                                                                             | -1.43 |
| CSF1R                   | colony stimulating factor 1 receptor                                                                 | -1.43 |
| CSF2RA                  | colony stimulating factor 2 receptor subunit alpha                                                   | -1.43 |
| CSF2RA                  | colony stimulating factor 2 receptor subunit alpha                                                   | -1.43 |
| DPYSL3                  | dihydropyrimidinase like 3                                                                           | -1.43 |
| KIF12                   | kinesin family member 12                                                                             | -1.43 |
| MMP23A                  | matrix metalloproteinase 23A (pseudogene)                                                            | -1.43 |
| PLBD1                   | phospholipase B domain containing 1                                                                  | -1.43 |
| PRRG2                   | proline rich and Gla domain 2                                                                        | -1.43 |
| RP11_329N153            |                                                                                                      | -1.43 |
| SLC7A7                  | solute carrier family 7 member 7                                                                     | -1.43 |
| SMIM3                   | small integral membrane protein 3                                                                    | -1.43 |
| ANO9                    | anoctamin 9                                                                                          | -1.44 |
| APOA1                   | apolipoprotein A1                                                                                    | -1.44 |
| BCRP3                   | BCR pseudogene 3                                                                                     | -1.44 |
| CLEC11A                 | C-type lectin domain containing 11A                                                                  | -1.44 |



|            |                                                                    |       |
|------------|--------------------------------------------------------------------|-------|
| CLEC12A    | C-type lectin domain family 12 member A                            | -1.44 |
| FZD1       | frizzled class receptor 1                                          | -1.44 |
| HP         | haptoglobin                                                        | -1.44 |
| LINC-PINT  | long intergenic non-protein coding RNA, p53 induced transcript     | -1.44 |
| LINC00472  | long intergenic non-protein coding RNA 472                         | -1.44 |
| PNP        | purine nucleoside phosphorylase                                    | -1.44 |
| RND1       | Rho family GTPase 1                                                | -1.44 |
| RNF152     | ring finger protein 152                                            | -1.44 |
| RP1_47M233 |                                                                    | -1.44 |
| SYNPO2     | synaptopodin 2                                                     | -1.44 |
| TMEM159    | transmembrane protein 159                                          | -1.44 |
| C1orf162   | chromosome 1 open reading frame 162                                | -1.45 |
| CASC19     | cancer susceptibility 19                                           | -1.45 |
| ERBB2      | erb-b2 receptor tyrosine kinase 2                                  | -1.45 |
| GDF15      | growth differentiation factor 15                                   | -1.45 |
| GLDC       | glycine decarboxylase                                              | -1.45 |
| KIRREL1    | kirre like nephrin family adhesion molecule 1                      | -1.45 |
| LGALS3BP   | galectin 3 binding protein                                         | -1.45 |
| LILRB2     | leukocyte immunoglobulin like receptor B2                          | -1.45 |
| SLFN12     | schlafen family member 12                                          | -1.45 |
| SUSD2      | sushi domain containing 2                                          | -1.45 |
| ZC3H12A    | zinc finger CCCH-type containing 12A                               | -1.45 |
| ZNF415     | zinc finger protein 415                                            | -1.45 |
| ALB        | albumin                                                            | -1.46 |
| ATP1B2     | ATPase Na <sup>+</sup> /K <sup>+</sup> transporting subunit beta 2 | -1.46 |
| CORO2B     | coronin 2B                                                         | -1.46 |
| FOXO1      | forkhead box O1                                                    | -1.46 |
| GALNT16    | polypeptide N-acetylgalactosaminyltransferase 16                   | -1.46 |
| HMOX1      | heme oxygenase 1                                                   | -1.46 |
| MRC2       | mannose receptor C type 2                                          | -1.46 |
| ODF2L      | outer dense fiber of sperm tails 2 like                            | -1.46 |
| PRKCB      | protein kinase C beta                                              | -1.46 |
| PROCR      | protein C receptor                                                 | -1.46 |
| UGT2B10    | UDP glucuronosyltransferase family 2 member B10                    | -1.46 |
| ZFP28      | ZFP28 zinc finger protein                                          | -1.46 |
| ZNF90      | zinc finger protein 90                                             | -1.46 |
| EPB41L3    | erythrocyte membrane protein band 4.1 like 3                       | -1.47 |
| GPR132     | G protein-coupled receptor 132                                     | -1.47 |
| GUCY1A1    | guanylate cyclase 1 soluble subunit alpha 1                        | -1.47 |
| KLHDC7A    | kelch domain containing 7A                                         | -1.47 |
| NFKBID     | NFKB inhibitor delta                                               | -1.47 |
| PCDHGB6    | protocadherin gamma subfamily B, 6                                 | -1.47 |
| RAP1GAP    | RAP1 GTPase activating protein                                     | -1.47 |
| ETS2       | ETS proto-oncogene 2, transcription factor                         | -1.48 |
| MS4A6A     | membrane spanning 4-domains A6A                                    | -1.48 |
| PCDH18     | protocadherin 18                                                   | -1.48 |
| PPP1R15A   | protein phosphatase 1 regulatory subunit 15A                       | -1.48 |
| SIDT1      | SID1 transmembrane family member 1                                 | -1.48 |
| SMPD3      | sphingomyelin phosphodiesterase 3                                  | -1.48 |
| STAT4      | signal transducer and activator of transcription 4                 | -1.48 |
| ARSJ       | arylsulfatase family member J                                      | -1.49 |
| BASP1      | brain abundant membrane attached signal protein 1                  | -1.49 |
| BEX4       | brain expressed X-linked 4                                         | -1.49 |
| CLEC4F     | C-type lectin domain family 4 member F                             | -1.49 |
| FMN1       | formin 1                                                           | -1.49 |
| LINC01197  | long intergenic non-protein coding RNA 1197                        | -1.49 |
| MST1R      | macrophage stimulating 1 receptor                                  | -1.49 |

|              |                                                           |       |
|--------------|-----------------------------------------------------------|-------|
| PDGFD        | platelet derived growth factor D                          | -1.49 |
| PLAAT3       | phospholipase A and acyltransferase 3                     | -1.49 |
| PLG          | plasminogen                                               | -1.49 |
| PRKX         | protein kinase X-linked                                   | -1.49 |
| PROZ         | protein Z, vitamin K dependent plasma glycoprotein        | -1.49 |
| SIGLEC7      | sialic acid binding Ig like lectin 7                      | -1.49 |
| TINAGL1      | tubulointerstitial nephritis antigen like 1               | -1.49 |
| ADCY5        | adenylate cyclase 5                                       | -1.5  |
| ANXA1        | annexin A1                                                | -1.5  |
| CEP126       | centrosomal protein 126                                   | -1.5  |
| COL4A4       | collagen type IV alpha 4 chain                            | -1.5  |
| GRAMD4       | GRAM domain containing 4                                  | -1.5  |
| HLA-DOA      | major histocompatibility complex, class II, DO alpha      | -1.5  |
| PAPPA        | pappalysin 1                                              | -1.5  |
| PFKP         | phosphofructokinase, platelet                             | -1.5  |
| SMIM38       | small integral membrane protein 38                        | -1.5  |
| SPNS2        | sphingolipid transporter 2                                | -1.5  |
| STAC         | SH3 and cysteine rich domain                              | -1.5  |
| TMED3        | transmembrane p24 trafficking protein 3                   | -1.5  |
| C1orf210     | chromosome 1 open reading frame 210                       | -1.51 |
| CD300A       | CD300a molecule                                           | -1.51 |
| CPAMD8       | C3 and PZP like alpha-2-macroglobulin domain containing 8 | -1.51 |
| FCRL3        | Fc receptor like 3                                        | -1.51 |
| ISG20        | interferon stimulated exonuclease gene 20                 | -1.51 |
| LINC02762    | long intergenic non-protein coding RNA 2762               | -1.51 |
| MS4A7        | membrane spanning 4-domains A7                            | -1.51 |
| PRICKLE2     | prickle planar cell polarity protein 2                    | -1.51 |
| RAB34        | RAB34, member RAS oncogene family                         | -1.51 |
| SDSL         | serine dehydratase like                                   | -1.51 |
| SOCS2-AS1    | SOCS2 antisense RNA 1                                     | -1.51 |
| TAT          | tyrosine aminotransferase                                 | -1.51 |
| TNFSF8       | TNF superfamily member 8                                  | -1.51 |
| DUSP6        | dual specificity phosphatase 6                            | -1.52 |
| EYS          | eyes shut homolog                                         | -1.52 |
| HENMT1       | HEN methyltransferase 1                                   | -1.52 |
| NCOA7        | nuclear receptor coactivator 7                            | -1.52 |
| RASGEF1A     | RasGEF domain family member 1A                            | -1.52 |
| SH2D3A       | SH2 domain containing 3A                                  | -1.52 |
| SLC8A1       | solute carrier family 8 member A1                         | -1.52 |
| ALDH8A1      | aldehyde dehydrogenase 8 family member A1                 | -1.53 |
| CDH1         | cadherin 1                                                | -1.53 |
| DSE          | dermatan sulfate epimerase                                | -1.53 |
| FLT3         | fms related receptor tyrosine kinase 3                    | -1.53 |
| LINC01238    | long intergenic non-protein coding RNA 1238               | -1.53 |
| MSR1         | macrophage scavenger receptor 1                           | -1.53 |
| PAIP2B       | poly(A) binding protein interacting protein 2B            | -1.53 |
| RP11_168K113 |                                                           | -1.53 |
| RP11_747H73  |                                                           | -1.53 |
| TC2N         | tandem C2 domains, nuclear                                | -1.53 |
| TLR2         | toll like receptor 2                                      | -1.53 |
| TRIB1        | tribbles pseudokinase 1                                   | -1.53 |
| ADGRE4P      | adhesion G protein-coupled receptor E4, pseudogene        | -1.54 |
| ARNTL2       | aryl hydrocarbon receptor nuclear translocator like 2     | -1.54 |
| CSRNP3       | cysteine and serine rich nuclear protein 3                | -1.54 |
| DLG2         | discs large MAGUK scaffold protein 2                      | -1.54 |
| PHLDA1       | pleckstrin homology like domain family A member 1         | -1.54 |
| S100A6       | S100 calcium binding protein A6                           | -1.54 |

|           |                                                                  |       |
|-----------|------------------------------------------------------------------|-------|
| SGCB      | sarcoglycan beta                                                 | -1.54 |
| SLC49A3   | solute carrier family 49 member 3                                | -1.54 |
| TMEM217   | transmembrane protein 217                                        | -1.54 |
| UNC13D    | unc-13 homolog D                                                 | -1.54 |
| ZNF469    | zinc finger protein 469                                          | -1.54 |
| ZSCAN18   | zinc finger and SCAN domain containing 18                        | -1.54 |
| ADIRF-AS1 | ADIRF antisense RNA 1                                            | -1.55 |
| AF1312152 |                                                                  | -1.55 |
| ARRB1     | arrestin beta 1                                                  | -1.55 |
| CYGB      | cytoglobin                                                       | -1.55 |
| FAM99B    | family with sequence similarity 99 member B                      | -1.55 |
| FBLN5     | fibulin 5                                                        | -1.55 |
| IRF8      | interferon regulatory factor 8                                   | -1.55 |
| LEPR      | leptin receptor                                                  | -1.55 |
| P2RY13    | purinergic receptor P2Y13                                        | -1.55 |
| PNMA8B    | PNMA family member 8B                                            | -1.55 |
| TMPRSS2   | transmembrane serine protease 2                                  | -1.55 |
| TRAT1     | T cell receptor associated transmembrane adaptor 1               | -1.55 |
| AC0076203 |                                                                  | -1.56 |
| ESR1      | estrogen receptor 1                                              | -1.56 |
| FGG       | fibrinogen gamma chain                                           | -1.56 |
| GSTZ1     | glutathione S-transferase zeta 1                                 | -1.56 |
| NAMPTP1   | nicotinamide phosphoribosyltransferase pseudogene 1              | -1.56 |
| NAP1L3    | nucleosome assembly protein 1 like 3                             | -1.56 |
| PLD1      | phospholipase D1                                                 | -1.56 |
| RGS9      | regulator of G protein signaling 9                               | -1.56 |
| SLA       | Src like adaptor                                                 | -1.56 |
| SPACA6    | sperm acrosome associated 6                                      | -1.56 |
| TUBB6     | tubulin beta 6 class V                                           | -1.56 |
| UBASH3B   | ubiquitin associated and SH3 domain containing B                 | -1.56 |
| WASF3     | WASP family member 3                                             | -1.56 |
| ZNF518B   | zinc finger protein 518B                                         | -1.56 |
| ADRA2B    | adrenoceptor alpha 2B                                            | -1.57 |
| LCAT      | lecithin-cholesterol acyltransferase                             | -1.57 |
| MCC       | MCC regulator of WNT signaling pathway                           | -1.57 |
| PCDHGA10  | protocadherin gamma subfamily A, 10                              | -1.57 |
| PTGER2    | prostaglandin E receptor 2                                       | -1.57 |
| ARL4C     | ADP ribosylation factor like GTPase 4C                           | -1.58 |
| ARMH4     | armadillo like helical domain containing 4                       | -1.58 |
| DUSP1     | dual specificity phosphatase 1                                   | -1.58 |
| IFI16     | interferon gamma inducible protein 16                            | -1.58 |
| KCNE1     | potassium voltage-gated channel subfamily E regulatory subunit 1 | -1.58 |
| KCNJ10    | potassium inwardly rectifying channel subfamily J member 10      | -1.58 |
| MS4A4E    | membrane spanning 4-domains A4E                                  | -1.58 |
| NDN       | necdin, MAGE family member                                       | -1.58 |
| PDZD4     | PDZ domain containing 4                                          | -1.58 |
| CBFA2T3   | CBFA2/RUNX1 partner transcriptional co-repressor 3               | -1.59 |
| CLIP4     | CAP-Gly domain containing linker protein family member 4         | -1.59 |
| KLF10     | Kruppel like factor 10                                           | -1.59 |
| PLIN2     | perilipin 2                                                      | -1.59 |
| PRNP      | prion protein                                                    | -1.59 |
| RASL11A   | RAS like family 11 member A                                      | -1.59 |
| RTL6      | retrotransposon Gag like 6                                       | -1.59 |
| SLC4A4    | solute carrier family 4 member 4                                 | -1.59 |
| STOM      | stomatin                                                         | -1.59 |
| ADGRE2    | adhesion G protein-coupled receptor E2                           | -1.6  |
| CHST3     | carbohydrate sulfotransferase 3                                  | -1.6  |

|               |                                                             |       |
|---------------|-------------------------------------------------------------|-------|
| EHD3          | EH domain containing 3                                      | -1.6  |
| FHL2          | four and a half LIM domains 2                               | -1.6  |
| IL2RA         | interleukin 2 receptor subunit alpha                        | -1.6  |
| IRAK3         | interleukin 1 receptor associated kinase 3                  | -1.6  |
| SIGLEC10      | sialic acid binding Ig like lectin 10                       | -1.6  |
| ACSM3         | acyl-CoA synthetase medium chain family member 3            | -1.61 |
| CD86          | CD86 molecule                                               | -1.61 |
| CYP2C8        | cytochrome P450 family 2 subfamily C member 8               | -1.61 |
| GPR65         | G protein-coupled receptor 65                               | -1.61 |
| KCNK5         | potassium two pore domain channel subfamily K member 5      | -1.61 |
| LRR4          | leucine rich repeat containing 4                            | -1.61 |
| ARMCX2        | armadillo repeat containing X-linked 2                      | -1.62 |
| DZIP1         | DAZ interacting zinc finger protein 1                       | -1.62 |
| ITM2C         | integral membrane protein 2C                                | -1.62 |
| LINC01702     | long intergenic non-protein coding RNA 1702                 | -1.62 |
| NAMPT         | nicotinamide phosphoribosyltransferase                      | -1.62 |
| UGT2B27P      | UDP glucuronosyltransferase family 2 member B27, pseudogene | -1.62 |
| CCL4          | C-C motif chemokine ligand 4                                | -1.63 |
| CCL4L1/CCL4L2 | C-C motif chemokine ligand 4 like 1                         | -1.63 |
| FAM107A       | family with sequence similarity 107 member A                | -1.63 |
| GADD45B       | growth arrest and DNA damage inducible beta                 | -1.63 |
| GZMK          | granzyme K                                                  | -1.63 |
| IL18R1        | interleukin 18 receptor 1                                   | -1.63 |
| MRO           | maestro                                                     | -1.63 |
| RNF122        | ring finger protein 122                                     | -1.63 |
| RP11_588K222  |                                                             | -1.63 |
| SH2D1A        | SH2 domain containing 1A                                    | -1.63 |
| TCAF2         | TRPM8 channel associated factor 2                           | -1.63 |
| C16orf54      | chromosome 16 open reading frame 54                         | -1.64 |
| IL21R         | interleukin 21 receptor                                     | -1.64 |
| LINC00313     | long intergenic non-protein coding RNA 313                  | -1.64 |
| MYZAP         | myocardial zonula adherens protein                          | -1.64 |
| PRKCQ         | protein kinase C theta                                      | -1.64 |
| THEMIS2       | thymocyte selection associated family member 2              | -1.64 |
| AMDHD1        | amidohydrolase domain containing 1                          | -1.65 |
| CA3           | carbonic anhydrase 3                                        | -1.65 |
| CD38          | CD38 molecule                                               | -1.65 |
| CD4           | CD4 molecule                                                | -1.65 |
| CTD_2114J121  |                                                             | -1.65 |
| FOXF1         | forkhead box F1                                             | -1.65 |
| HOGA1         | 4-hydroxy-2-oxoglutarate aldolase 1                         | -1.65 |
| ITK           | IL2 inducible T cell kinase                                 | -1.65 |
| LILRA1        | leukocyte immunoglobulin like receptor A1                   | -1.65 |
| LILRB5        | leukocyte immunoglobulin like receptor B5                   | -1.65 |
| LOC100506388  | uncharacterized LOC100506388                                | -1.65 |
| P3H3          | prolyl 3-hydroxylase 3                                      | -1.65 |
| RP11_253E33   |                                                             | -1.65 |
| TNXB          | tenascin XB                                                 | -1.65 |
| ATF3          | activating transcription factor 3                           | -1.66 |
| C8A           | complement C8 alpha chain                                   | -1.66 |
| FCGR1B        | Fc fragment of IgG receptor 1b                              | -1.66 |
| IGF1R         | insulin like growth factor 1 receptor                       | -1.66 |
| LTBP4         | latent transforming growth factor beta binding protein 4    | -1.66 |
| RAB20         | RAB20, member RAS oncogene family                           | -1.66 |
| RUNX3         | RUNX family transcription factor 3                          | -1.66 |
| AGTR1         | angiotensin II receptor type 1                              | -1.67 |
| ARID3C        | AT-rich interaction domain 3C                               | -1.67 |

|                           |                                                               |       |
|---------------------------|---------------------------------------------------------------|-------|
| CACNA2D1                  | calcium voltage-gated channel auxiliary subunit alpha2delta 1 | -1.67 |
| CYBRD1                    | cytochrome b reductase 1                                      | -1.67 |
| HDAC9                     | histone deacetylase 9                                         | -1.67 |
| LRAT                      | lecithin retinol acyltransferase                              | -1.67 |
| NAV2                      | neuron navigator 2                                            | -1.67 |
| PLA2G5                    | phospholipase A2 group V                                      | -1.67 |
| PLSCR4                    | phospholipid scramblase 4                                     | -1.67 |
| SIGLEC8                   | sialic acid binding Ig like lectin 8                          | -1.67 |
| SLC18A2                   | solute carrier family 18 member A2                            | -1.67 |
| SV2B                      | synaptic vesicle glycoprotein 2B                              | -1.67 |
| CREB5                     | cAMP responsive element binding protein 5                     | -1.68 |
| LINC00924                 | long intergenic non-protein coding RNA 924                    | -1.68 |
| MIAT                      | myocardial infarction associated transcript                   | -1.68 |
| MIP                       | major intrinsic protein of lens fiber                         | -1.68 |
| NAPSB                     | napsin B aspartic peptidase, pseudogene                       | -1.68 |
| NFASC                     | neurofascin                                                   | -1.68 |
| SLC7A5                    | solute carrier family 7 member 5                              | -1.68 |
| TCHH                      | trichohyalin                                                  | -1.68 |
| TRNP1                     | TMF1 regulated nuclear protein 1                              | -1.68 |
| UGT1A10 (includes others) | UDP glucuronosyltransferase family 1 member A9                | -1.68 |
| ALDOB                     | aldolase, fructose-bisphosphate B                             | -1.69 |
| F9                        | coagulation factor IX                                         | -1.69 |
| FUT6                      | fucosyltransferase 6                                          | -1.69 |
| GOT1                      | glutamic-oxaloacetic transaminase 1                           | -1.69 |
| GRAMD1B                   | GRAM domain containing 1B                                     | -1.69 |
| LARP6                     | La ribonucleoprotein 6, translational regulator               | -1.69 |
| MYADM                     | myeloid associated differentiation marker                     | -1.69 |
| SELL                      | selectin L                                                    | -1.69 |
| SIGLEC11                  | sialic acid binding Ig like lectin 11                         | -1.69 |
| SLC39A5                   | solute carrier family 39 member 5                             | -1.69 |
| TKFC                      | triokinase and FMN cyclase                                    | -1.69 |
| TM4SF1                    | transmembrane 4 L six family member 1                         | -1.69 |
| ZNF888                    | zinc finger protein 888                                       | -1.69 |
| CILP                      | cartilage intermediate layer protein                          | -1.7  |
| EIF4E3                    | eukaryotic translation initiation factor 4E family member 3   | -1.7  |
| IER5L                     | immediate early response 5 like                               | -1.7  |
| LAX1                      | lymphocyte transmembrane adaptor 1                            | -1.7  |
| NCR3LG1                   | natural killer cell cytotoxicity receptor 3 ligand 1          | -1.7  |
| SERHL2                    | serine hydrolase like 2                                       | -1.7  |
| TRIM15                    | tripartite motif containing 15                                | -1.7  |
| ALOX5                     | arachidonate 5-lipoxygenase                                   | -1.71 |
| ARHGAP15                  | Rho GTPase activating protein 15                              | -1.71 |
| ARHGEF16                  | Rho guanine nucleotide exchange factor 16                     | -1.71 |
| KCNA3                     | potassium voltage-gated channel subfamily A member 3          | -1.71 |
| LINC00598                 | long intergenic non-protein coding RNA 598                    | -1.71 |
| MTCL1                     | microtubule crosslinking factor 1                             | -1.71 |
| SEL1L3                    | SEL1L family member 3                                         | -1.71 |
| TNFRSF10D                 | TNF receptor superfamily member 10d                           | -1.71 |
| ZNF160                    | zinc finger protein 160                                       | -1.71 |
| ZNF439                    | zinc finger protein 439                                       | -1.71 |
| ZNF827                    | zinc finger protein 827                                       | -1.71 |
| BST1                      | bone marrow stromal cell antigen 1                            | -1.72 |
| CXCR4                     | C-X-C motif chemokine receptor 4                              | -1.72 |
| DSG2                      | desmoglein 2                                                  | -1.72 |
| FCN1                      | ficolin 1                                                     | -1.72 |
| LOC101927751              | uncharacterized LOC101927751                                  | -1.72 |

|                         |                                                                                        |       |
|-------------------------|----------------------------------------------------------------------------------------|-------|
| LOC400867               | uncharacterized LOC400867                                                              | -1.72 |
| LY9                     | lymphocyte antigen 9                                                                   | -1.72 |
| PRR26                   | proline rich 26                                                                        | -1.72 |
| PTPRN2                  | protein tyrosine phosphatase receptor type N2                                          | -1.72 |
| RNF165                  | ring finger protein 165                                                                | -1.72 |
| RP11_96D16              |                                                                                        | -1.72 |
| TGFB3                   | transforming growth factor beta 3                                                      | -1.72 |
| BHLHE41                 | basic helix-loop-helix family member e41                                               | -1.73 |
| DLG3                    | discs large MAGUK scaffold protein 3                                                   | -1.73 |
| EMP1                    | epithelial membrane protein 1                                                          | -1.73 |
| FGL2                    | fibrinogen like 2                                                                      | -1.73 |
| GSTP1                   | glutathione S-transferase pi 1                                                         | -1.73 |
| MEIS3P1                 | Meis homeobox 3 pseudogene 1                                                           | -1.73 |
| PLK3                    | polo like kinase 3                                                                     | -1.73 |
| SEMA4A                  | semaphorin 4A                                                                          | -1.73 |
| ZNF331                  | zinc finger protein 331                                                                | -1.73 |
| ZNF470                  | zinc finger protein 470                                                                | -1.73 |
| ALDH1A3                 | aldehyde dehydrogenase 1 family member A3                                              | -1.74 |
| CTH                     | cystathionine gamma-lyase                                                              | -1.74 |
| DGCR5                   | DiGeorge syndrome critical region gene 5                                               | -1.74 |
| PCDHGB7                 | protocadherin gamma subfamily B, 7                                                     | -1.74 |
| PLEKHH2                 | pleckstrin homology, MyTH4 and FERM domain containing H2                               | -1.74 |
| SCRN1                   | secernin 1                                                                             | -1.74 |
| SIGLEC14                | sialic acid binding Ig like lectin 14                                                  | -1.74 |
| SLC11A1                 | solute carrier family 11 member 1                                                      | -1.74 |
| SLC35F2                 | solute carrier family 35 member F2                                                     | -1.74 |
| SLC4A3                  | solute carrier family 4 member 3                                                       | -1.74 |
| TGM2                    | transglutaminase 2                                                                     | -1.74 |
| ZNF347                  | zinc finger protein 347                                                                | -1.74 |
| ZNF816                  | zinc finger protein 816                                                                | -1.74 |
| ZNF853                  | zinc finger protein 853                                                                | -1.74 |
| CLCF1                   | cardiotrophin like cytokine factor 1                                                   | -1.75 |
| CLRN3                   | clarin 3                                                                               | -1.75 |
| CP                      | ceruloplasmin                                                                          | -1.75 |
| JHY                     | junctional cadherin complex regulator                                                  | -1.75 |
| PELATON                 | plaque enriched lncRNA in atherosclerotic and inflammatory bowel macrophage regulation | -1.75 |
| PLA2G4A                 | phospholipase A2 group IVA                                                             | -1.75 |
| RGPD4 (includes others) | RANBP2 like and GRIP domain containing 5                                               | -1.75 |
| SLC2A3                  | solute carrier family 2 member 3                                                       | -1.75 |
| WDR17                   | WD repeat domain 17                                                                    | -1.75 |
| ZBP1                    | Z-DNA binding protein 1                                                                | -1.75 |
| ZFPM2                   | zinc finger protein, FOG family member 2                                               | -1.75 |
| ZNF471                  | zinc finger protein 471                                                                | -1.75 |
| GLIS3                   | GLIS family zinc finger 3                                                              | -1.76 |
| IGLON5                  | IgLON family member 5                                                                  | -1.76 |
| SCIMP                   | SLP adaptor and CSK interacting membrane protein                                       | -1.76 |
| SGPP2                   | sphingosine-1-phosphate phosphatase 2                                                  | -1.76 |
| SOCS2                   | suppressor of cytokine signaling 2                                                     | -1.76 |
| SSC5D                   | scavenger receptor cysteine rich family member with 5 domains                          | -1.76 |
| ZNF831                  | zinc finger protein 831                                                                | -1.76 |
| ADAMTS2                 | ADAM metallopeptidase with thrombospondin type 1 motif 2                               | -1.77 |
| ARMCX3                  | armadillo repeat containing X-linked 3                                                 | -1.77 |
| COL9A2                  | collagen type IX alpha 2 chain                                                         | -1.77 |
| DEFB1                   | defensin beta 1                                                                        | -1.77 |
| ENDOD1                  | endonuclease domain containing 1                                                       | -1.77 |

|              |                                                               |       |
|--------------|---------------------------------------------------------------|-------|
| ERMN         | ermin                                                         | -1.77 |
| GPR162       | G protein-coupled receptor 162                                | -1.77 |
| IGLV6-57     | immunoglobulin lambda variable 6-57                           | -1.77 |
| RP11_295K31  |                                                               | -1.77 |
| ZKSCAN7      | zinc finger with KRAB and SCAN domains 7                      | -1.77 |
| CAMK4        | calcium/calmodulin dependent protein kinase IV                | -1.78 |
| CD69         | CD69 molecule                                                 | -1.78 |
| ELMO3        | engulfment and cell motility 3                                | -1.78 |
| GHR          | growth hormone receptor                                       | -1.78 |
| LXN          | latexin                                                       | -1.78 |
| PPP1R1C      | protein phosphatase 1 regulatory inhibitor subunit 1C         | -1.78 |
| RP11_93B149  |                                                               | -1.78 |
| SERTAD1      | SERTA domain containing 1                                     | -1.78 |
| FCMR         | Fc fragment of IgM receptor                                   | -1.79 |
| GYS2         | glycogen synthase 2                                           | -1.79 |
| HBEGF        | heparin binding EGF like growth factor                        | -1.79 |
| IL18RAP      | interleukin 18 receptor accessory protein                     | -1.79 |
| MIR22HG      | MIR22 host gene                                               | -1.79 |
| AATK         | apoptosis associated tyrosine kinase                          | -1.8  |
| DPF3         | double PHD fingers 3                                          | -1.8  |
| EGR2         | early growth response 2                                       | -1.8  |
| ETNPPL       | ethanolamine-phosphate phospho-lyase                          | -1.8  |
| EZR          | ezrin                                                         | -1.8  |
| GPR182       | G protein-coupled receptor 182                                | -1.8  |
| MIR223HG     | MIR223 host gene                                              | -1.8  |
| NELL2        | neural EGFL like 2                                            | -1.8  |
| NKD2         | NKD inhibitor of WNT signaling pathway 2                      | -1.8  |
| PDE9A        | phosphodiesterase 9A                                          | -1.8  |
| RP11-284N8.3 |                                                               | -1.8  |
| SH3YL1       | SH3 and SYLF domain containing 1                              | -1.8  |
| SKAP1        | src kinase associated phosphoprotein 1                        | -1.8  |
| TNFRSF10C    | TNF receptor superfamily member 10c                           | -1.8  |
| HSPB6        | heat shock protein family B (small) member 6                  | -1.81 |
| AQP4         | aquaporin 4                                                   | -1.82 |
| B3GNT7       | UDP-GlcNAc:betaGal beta-1,3-N-acetylglucosaminyltransferase 7 | -1.82 |
| HSH2D        | hematopoietic SH2 domain containing                           | -1.82 |
| SLIT2        | slit guidance ligand 2                                        | -1.82 |
| SNRPN        | small nuclear ribonucleoprotein polypeptide N                 | -1.82 |
| TLR10        | toll like receptor 10                                         | -1.82 |
| VMO1         | vitelline membrane outer layer 1 homolog                      | -1.82 |
| CCDC198      | coiled-coil domain containing 198                             | -1.83 |
| EPHB6        | EPH receptor B6                                               | -1.83 |
| FXSD1        | FXSD domain containing ion transport regulator 1              | -1.83 |
| GAPT         | GRB2 binding adaptor protein, transmembrane                   | -1.83 |
| GCH1         | GTP cyclohydrolase 1                                          | -1.83 |
| SLC1A1       | solute carrier family 1 member 1                              | -1.83 |
| WFDC1        | WAP four-disulfide core domain 1                              | -1.83 |
| WNT4         | Wnt family member 4                                           | -1.83 |
| ABLIM3       | actin binding LIM protein family member 3                     | -1.84 |
| C3orf14      | chromosome 3 open reading frame 14                            | -1.84 |
| CCDC68       | coiled-coil domain containing 68                              | -1.84 |
| MAFF         | MAF bZIP transcription factor F                               | -1.84 |
| MBL2         | mannose binding lectin 2                                      | -1.84 |
| PLD4         | phospholipase D family member 4                               | -1.84 |
| RP1_239B225  |                                                               | -1.84 |
| SLC7A1       | solute carrier family 7 member 1                              | -1.84 |
| ARNT2        | aryl hydrocarbon receptor nuclear translocator 2              | -1.85 |

|              |                                                                                |       |
|--------------|--------------------------------------------------------------------------------|-------|
| SMIM10L2A    | small integral membrane protein 10 like 2A                                     | -1.85 |
| TTYH1        | tweety family member 1                                                         | -1.85 |
| FCHO1        | FCH and mu domain containing endocytic adaptor 1                               | -1.86 |
| GBA3         | glucosylceramidase beta 3 (gene/pseudogene)                                    | -1.86 |
| MPC1         | mitochondrial pyruvate carrier 1                                               | -1.86 |
| PADI2        | peptidyl arginine deiminase 2                                                  | -1.86 |
| SLC13A2      | solute carrier family 13 member 2                                              | -1.86 |
| TAGAP        | T cell activation RhoGTPase activating protein                                 | -1.86 |
| ZNF204P      | zinc finger protein 204, pseudogene                                            | -1.86 |
| CAMK2B       | calcium/calmodulin dependent protein kinase II beta                            | -1.87 |
| NCKAP5       | NCK associated protein 5                                                       | -1.87 |
| PRKCQ-AS1    | PRKCQ antisense RNA 1                                                          | -1.87 |
| DOK6         | docking protein 6                                                              | -1.88 |
| FABP1        | fatty acid binding protein 1                                                   | -1.88 |
| FAM99A       | family with sequence similarity 99 member A                                    | -1.88 |
| MNDA         | myeloid cell nuclear differentiation antigen                                   | -1.88 |
| PDE1A        | phosphodiesterase 1A                                                           | -1.88 |
| RP11_203J248 |                                                                                | -1.88 |
| RSPH1        | radial spoke head component 1                                                  | -1.88 |
| UGT2B7       | UDP glucuronosyltransferase family 2 member B7                                 | -1.88 |
| AL1616685    |                                                                                | -1.89 |
| ELAPOR2      | endosome-lysosome associated apoptosis and autophagy regulator family member 2 | -1.89 |
| AZGP1P1      | AZGP1 pseudogene 1                                                             | -1.9  |
| C5AR1        | complement C5a receptor 1                                                      | -1.9  |
| CYTIP        | cytohesin 1 interacting protein                                                | -1.9  |
| IL18         | interleukin 18                                                                 | -1.9  |
| LINC02593    | long intergenic non-protein coding RNA 2593                                    | -1.9  |
| P2RX5        | purinergic receptor P2X 5                                                      | -1.9  |
| P2RY10       | P2Y receptor family member 10                                                  | -1.9  |
| PRAMEF10     | PRAME family member 10                                                         | -1.9  |
| SYTL5        | synaptotagmin like 5                                                           | -1.9  |
| TBXA2R       | thromboxane A2 receptor                                                        | -1.9  |
| TMEM156      | transmembrane protein 156                                                      | -1.9  |
| CSF3R        | colony stimulating factor 3 receptor                                           | -1.91 |
| FGB          | fibrinogen beta chain                                                          | -1.91 |
| NPHP4        | nephrocystin 4                                                                 | -1.91 |
| RGS11        | regulator of G protein signaling 11                                            | -1.91 |
| SSTR2        | somatostatin receptor 2                                                        | -1.91 |
| CXCL3        | C-X-C motif chemokine ligand 3                                                 | -1.92 |
| DUSP2        | dual specificity phosphatase 2                                                 | -1.92 |
| FAM110C      | family with sequence similarity 110 member C                                   | -1.92 |
| HSD17B2      | hydroxysteroid 17-beta dehydrogenase 2                                         | -1.92 |
| RP5-117110.5 |                                                                                | -1.92 |
| TCAF2P1      | TRPM8 channel associated factor 2 pseudogene 1                                 | -1.92 |
| TPPP2        | tubulin polymerization promoting protein family member 2                       | -1.92 |
| DOCK8        | dedicator of cytokinesis 8                                                     | -1.93 |
| EDNRB        | endothelin receptor type B                                                     | -1.93 |
| LOC105375153 |                                                                                | -1.93 |
| MXRA5        | matrix remodeling associated 5                                                 | -1.93 |
| PLA2R1       | phospholipase A2 receptor 1                                                    | -1.93 |
| SERPINA11    | serpin family A member 11                                                      | -1.93 |
| SPART        | spartin                                                                        | -1.93 |
| AKR1D1       | aldo-keto reductase family 1 member D1                                         | -1.94 |
| RP11_90L18   |                                                                                | -1.94 |
| TENT5C       | terminal nucleotidyltransferase 5C                                             | -1.94 |
| USP43        | ubiquitin specific peptidase 43                                                | -1.94 |
| DIRAS3       | DIRAS family GTPase 3                                                          | -1.95 |



|                          |                                                           |       |
|--------------------------|-----------------------------------------------------------|-------|
| DTHD1                    | death domain containing 1                                 | -1.95 |
| GSPT2                    | G1 to S phase transition 2                                | -1.95 |
| PTGIR                    | prostaglandin I2 receptor                                 | -1.95 |
| STX11                    | syntaxin 11                                               | -1.95 |
| ZNF711                   | zinc finger protein 711                                   | -1.95 |
| ALOX5AP                  | arachidonate 5-lipoxygenase activating protein            | -1.96 |
| BMP6                     | bone morphogenetic protein 6                              | -1.96 |
| GREM2                    | gremlin 2, DAN family BMP antagonist                      | -1.96 |
| OIT3                     | oncoprotein induced transcript 3                          | -1.96 |
| RARB                     | retinoic acid receptor beta                               | -1.96 |
| RNF150                   | ring finger protein 150                                   | -1.96 |
| CLDN4                    | claudin 4                                                 | -1.97 |
| MRC1                     | mannose receptor C-type 1                                 | -1.97 |
| NLGN4X                   | neuroligin 4 X-linked                                     | -1.97 |
| SLC19A3                  | solute carrier family 19 member 3                         | -1.97 |
| SPATA6                   | spermatogenesis associated 6                              | -1.97 |
| TTLL2                    | tubulin tyrosine ligase like 2                            | -1.97 |
| VANGL2                   | VANGL planar cell polarity protein 2                      | -1.97 |
| ZNF239                   | zinc finger protein 239                                   | -1.97 |
| ASPN                     | asporin                                                   | -1.98 |
| BGN                      | biglycan                                                  | -1.98 |
| EMILIN1                  | elastin microfibril interfacer 1                          | -1.98 |
| EPB41L4A                 | erythrocyte membrane protein band 4.1 like 4A             | -1.98 |
| LDOC1                    | LDOC1 regulator of NFkB signaling                         | -1.98 |
| NFAM1                    | NFAT activating protein with ITAM motif 1                 | -1.98 |
| RGS16                    | regulator of G protein signaling 16                       | -1.98 |
| TTC36                    | tetratricopeptide repeat domain 36                        | -1.98 |
| ADAP1                    | ArfGAP with dual PH domains 1                             | -1.99 |
| CSRNP1                   | cysteine and serine rich nuclear protein 1                | -1.99 |
| FAM135B                  | family with sequence similarity 135 member B              | -1.99 |
| GPR171                   | G protein-coupled receptor 171                            | -1.99 |
| LPAL2                    | lipoprotein(a) like 2, pseudogene                         | -1.99 |
| MGLL                     | monoglyceride lipase                                      | -1.99 |
| POM121L9P                | POM121 transmembrane nucleoporin like 9, pseudogene       | -1.99 |
| RANBP3L                  | RAN binding protein 3 like                                | -1.99 |
| RBMS3                    | RNA binding motif single stranded interacting protein 3   | -1.99 |
| SAMSN1                   | SAM domain, SH3 domain and nuclear localization signals 1 | -1.99 |
| SNHG14                   |                                                           | -1.99 |
| TCTEX1D1                 | Tctex1 domain containing 1                                | -1.99 |
| APOBEC3C                 | apolipoprotein B mRNA editing enzyme catalytic subunit 3C | -2    |
| BHLHE22                  | basic helix-loop-helix family member e22                  | -2    |
| CKMT2                    | creatine kinase, mitochondrial 2                          | -2    |
| CLEC4E                   | C-type lectin domain family 4 member E                    | -2    |
| CYP2A6 (includes others) | cytochrome P450 family 2 subfamily A member 6             | -2    |
| GPRIN3                   | GPRIN family member 3                                     | -2    |
| KAZN                     | kazrin, periplakin interacting protein                    | -2    |
| METRNL                   | meteorin like, glial cell differentiation regulator       | -2    |
| PLA2G2D                  | phospholipase A2 group IID                                | -2    |
| RUBCNL                   | rubicon like autophagy enhancer                           | -2    |
| SCN11A                   | sodium voltage-gated channel alpha subunit 11             | -2    |
| SNURF                    | SNRPN upstream reading frame                              | -2    |
| VSIG4                    | V-set and immunoglobulin domain containing 4              | -2    |
| OSMR                     | oncostatin M receptor                                     | -2.01 |
| S100A9                   | S100 calcium binding protein A9                           | -2.01 |
| CD163                    | CD163 molecule                                            | -2.02 |
| CFP                      | complement factor properdin                               | -2.02 |

|               |                                                           |       |
|---------------|-----------------------------------------------------------|-------|
| COL4A3        | collagen type IV alpha 3 chain                            | -2.02 |
| GPD1          | glycerol-3-phosphate dehydrogenase 1                      | -2.02 |
| LINC01767     | long intergenic non-protein coding RNA 1767               | -2.02 |
| LOC284454     | uncharacterized LOC284454                                 | -2.02 |
| NRSN2         | neurensin 2                                               | -2.02 |
| SELENOM       | selenoprotein M                                           | -2.02 |
| SERPINB9      | serpin family B member 9                                  | -2.02 |
| SNAP25        | synaptosome associated protein 25                         | -2.02 |
| SULF2         | sulfatase 2                                               | -2.02 |
| TIMP1         | TIMP metalloproteinase inhibitor 1                        | -2.02 |
| YBX3          | Y-box binding protein 3                                   | -2.02 |
| LINC00659     | long intergenic non-protein coding RNA 659                | -2.03 |
| LRRC6         | leucine rich repeat containing 6                          | -2.03 |
| MT1A          | metallothionein 1A                                        | -2.03 |
| NTSR1         | neurotensin receptor 1                                    | -2.03 |
| PLGLB1/PLGLB2 | plasminogen like B2                                       | -2.03 |
| CLEC5A        | C-type lectin domain containing 5A                        | -2.04 |
| DUSP5         | dual specificity phosphatase 5                            | -2.04 |
| MYO10         | myosin X                                                  | -2.04 |
| NLRP3         | NLR family pyrin domain containing 3                      | -2.04 |
| PYGO1         | pygopus family PHD finger 1                               | -2.04 |
| SAMD12        | sterile alpha motif domain containing 12                  | -2.04 |
| SYTL3         | synaptotagmin like 3                                      | -2.04 |
| CCN1          | cellular communication network factor 1                   | -2.05 |
| GIPR          | gastric inhibitory polypeptide receptor                   | -2.05 |
| OLFM1         | olfactomedin 1                                            | -2.05 |
| SRGN          | serglycin                                                 | -2.05 |
| AQP1          | aquaporin 1 (Colton blood group)                          | -2.06 |
| ASPHD1        | aspartate beta-hydroxylase domain containing 1            | -2.06 |
| BCL2L14       | BCL2 like 14                                              | -2.06 |
| BDKRB2        | bradykinin receptor B2                                    | -2.06 |
| CD1D          | CD1d molecule                                             | -2.06 |
| NFATC1        | nuclear factor of activated T cells 1                     | -2.06 |
| QSOX1         | quiescin sulfhydryl oxidase 1                             | -2.06 |
| SLC7A2        | solute carrier family 7 member 2                          | -2.06 |
| SORCS2        | sortilin related VPS10 domain containing receptor 2       | -2.06 |
| TESC          | tescalcin                                                 | -2.06 |
| ZNF215        | zinc finger protein 215                                   | -2.06 |
| GPC4          | glypican 4                                                | -2.07 |
| MAB21L2       | mab-21 like 2                                             | -2.07 |
| MPPED1        | metallophosphoesterase domain containing 1                | -2.07 |
| TTC25         | tetratricopeptide repeat domain 25                        | -2.07 |
| ADAMTS4       | ADAM metalloproteinase with thrombospondin type 1 motif 4 | -2.08 |
| IER3          | immediate early response 3                                | -2.08 |
| THBD          | thrombomodulin                                            | -2.08 |
| ZFP3          | ZFP3 zinc finger protein                                  | -2.08 |
| AXL           | AXL receptor tyrosine kinase                              | -2.09 |
| GPAT3         | glycerol-3-phosphate acyltransferase 3                    | -2.09 |
| LAMA2         | laminin subunit alpha 2                                   | -2.09 |
| SULT1C4       | sulfotransferase family 1C member 4                       | -2.09 |
| B4GALNT3      | beta-1,4-N-acetyl-galactosaminyltransferase 3             | -2.1  |
| DTX1          | deltex E3 ubiquitin ligase 1                              | -2.1  |
| FGFR1         | fibroblast growth factor receptor 1                       | -2.1  |
| IFITM10       | interferon induced transmembrane protein 10               | -2.1  |
| KBTD11        | kelch repeat and BTB domain containing 11                 | -2.1  |
| LINC01669     | long intergenic non-protein coding RNA 1669               | -2.1  |
| P3H2          | prolyl 3-hydroxylase 2                                    | -2.1  |

|                      |                                                               |       |
|----------------------|---------------------------------------------------------------|-------|
| PHGDH                | phosphoglycerate dehydrogenase                                | -2.1  |
| PMAIP1               | phorbol-12-myristate-13-acetate-induced protein 1             | -2.1  |
| PRICKLE1             | prickle planar cell polarity protein 1                        | -2.1  |
| PRKAR2B              | protein kinase cAMP-dependent type II regulatory subunit beta | -2.1  |
| AC092053.3           |                                                               | -2.11 |
| BACE2                | beta-secretase 2                                              | -2.11 |
| CCL22                | C-C motif chemokine ligand 22                                 | -2.11 |
| LRCOL1               | leucine rich colipase like 1                                  | -2.11 |
| LRRN4                | leucine rich repeat neuronal 4                                | -2.11 |
| PMEPA1               | prostate transmembrane protein, androgen induced 1            | -2.11 |
| TNFRSF21             | TNF receptor superfamily member 21                            | -2.11 |
| CCDC141              | coiled-coil domain containing 141                             | -2.12 |
| CR1                  | complement C3b/C4b receptor 1 (Knops blood group)             | -2.12 |
| ST8SIA6              | ST8 alpha-N-acetyl-neuraminide alpha-2,8-sialyltransferase 6  | -2.12 |
| TMEM26               | transmembrane protein 26                                      | -2.12 |
| AADAT                | aminoadipate aminotransferase                                 | -2.13 |
| ADGRD1               | adhesion G protein-coupled receptor D1                        | -2.13 |
| ADGRE1               | adhesion G protein-coupled receptor E1                        | -2.13 |
| FCRL1                | Fc receptor like 1                                            | -2.13 |
| MB21D2               | Mab-21 domain containing 2                                    | -2.13 |
| SNAI1                | snail family transcriptional repressor 1                      | -2.13 |
| ZNF334               | zinc finger protein 334                                       | -2.13 |
| ENO3                 | enolase 3                                                     | -2.14 |
| HAO2                 | hydroxyacid oxidase 2                                         | -2.14 |
| LTK                  | leukocyte receptor tyrosine kinase                            | -2.14 |
| MAPK15               | mitogen-activated protein kinase 15                           | -2.14 |
| SPHK1                | sphingosine kinase 1                                          | -2.14 |
| ACHE                 | acetylcholinesterase (Cartwright blood group)                 | -2.15 |
| GALNT12              | polypeptide N-acetylgalactosaminyltransferase 12              | -2.15 |
| LILRA2               | leukocyte immunoglobulin like receptor A2                     | -2.15 |
| RP5_1052I52          |                                                               | -2.15 |
| DACT1                | dishevelled binding antagonist of beta catenin 1              | -2.16 |
| PLAC8                | placenta associated 8                                         | -2.16 |
| RP11_23P136          |                                                               | -2.16 |
| TMEM71               | transmembrane protein 71                                      | -2.16 |
| ARHGAP8/PRR5-ARHGAP8 | Rho GTPase activating protein 8                               | -2.17 |
| C1QTNF7              | C1q and TNF related 7                                         | -2.17 |
| CDC42BPG             | CDC42 binding protein kinase gamma                            | -2.17 |
| DNASE1L3             | deoxyribonuclease 1 like 3                                    | -2.17 |
| IL1RAPL2             | interleukin 1 receptor accessory protein like 2               | -2.17 |
| SCML4                | Scm polycomb group protein like 4                             | -2.17 |
| SDK1                 | sidekick cell adhesion molecule 1                             | -2.17 |
| SLAIN1               | SLAIN motif family member 1                                   | -2.17 |
| ADAMTS1              | ADAM metalloproteinase with thrombospondin type 1 motif 1     | -2.18 |
| ADAMTS13             | ADAM metalloproteinase with thrombospondin type 1 motif 13    | -2.18 |
| PDE7B                | phosphodiesterase 7B                                          | -2.18 |
| PDP1                 | pyruvate dehydrogenase phosphatase catalytic subunit 1        | -2.18 |
| SYN1                 | synapsin I                                                    | -2.18 |
| TDO2                 | tryptophan 2,3-dioxygenase                                    | -2.18 |
| TMIGD3               | transmembrane and immunoglobulin domain containing 3          | -2.18 |
| VSIG2                | V-set and immunoglobulin domain containing 2                  | -2.18 |
| WIPF3                | WAS/WASL interacting protein family member 3                  | -2.18 |
| MAMDC2               | MAM domain containing 2                                       | -2.19 |
| FCER1A               | Fc fragment of IgE receptor Ia                                | -2.2  |
| NTF3                 | neurotrophin 3                                                | -2.2  |
| TMPRSS13             | transmembrane serine protease 13                              | -2.2  |

|            |                                                                |       |
|------------|----------------------------------------------------------------|-------|
| ZFP36      | ZFP36 ring finger protein                                      | -2.2  |
| DUSP4      | dual specificity phosphatase 4                                 | -2.21 |
| ITGA9      | integrin subunit alpha 9                                       | -2.21 |
| PTPRS      | protein tyrosine phosphatase receptor type S                   | -2.21 |
| SDK2       | sidekick cell adhesion molecule 2                              | -2.21 |
| SEMA3C     | semaphorin 3C                                                  | -2.21 |
| CRYAB      | crystallin alpha B                                             | -2.22 |
| TCIM       | transcriptional and immune response regulator                  | -2.22 |
| COL8A2     | collagen type VIII alpha 2 chain                               | -2.23 |
| MCTP2      | multiple C2 and transmembrane domain containing 2              | -2.23 |
| SPATA18    | spermatogenesis associated 18                                  | -2.23 |
| ZNF667     | zinc finger protein 667                                        | -2.23 |
| CDH6       | cadherin 6                                                     | -2.24 |
| CRMP1      | collapsin response mediator protein 1                          | -2.24 |
| ESYT3      | extended synaptotagmin 3                                       | -2.24 |
| KMO        | kynurenine 3-monooxygenase                                     | -2.24 |
| PCDH9      | protocadherin 9                                                | -2.24 |
| SOX6       | SRY-box transcription factor 6                                 | -2.24 |
| CDCP1      | CUB domain containing protein 1                                | -2.25 |
| GLT1D1     | glycosyltransferase 1 domain containing 1                      | -2.25 |
| KLF4       | Kruppel like factor 4                                          | -2.25 |
| LURAP1L    | leucine rich adaptor protein 1 like                            | -2.25 |
| SLC15A1    | solute carrier family 15 member 1                              | -2.26 |
| FILIP1L    | filamin A interacting protein 1 like                           | -2.27 |
| P2RY12     | purinergic receptor P2Y12                                      | -2.27 |
| ZNF667-AS1 | ZNF667 antisense RNA 1 (head to head)                          | -2.27 |
| ANK3       | ankyrin 3                                                      | -2.28 |
| HBB        | hemoglobin subunit beta                                        | -2.28 |
| KRTCAP3    | keratinocyte associated protein 3                              | -2.28 |
| PCDH19     | protocadherin 19                                               | -2.28 |
| SEMA3D     | semaphorin 3D                                                  | -2.28 |
| ADAM28     | ADAM metallopeptidase domain 28                                | -2.29 |
| CYP2B6     | cytochrome P450 family 2 subfamily B member 6                  | -2.29 |
| FAHD2B     | fumarylacetoacetate hydrolase domain containing 2B             | -2.29 |
| NBEA       | neurobeachin                                                   | -2.29 |
| PFKFB3     | 6-phosphofructo-2-kinase/fructose-2,6-biphosphatase 3          | -2.29 |
| SNHG18     | small nucleolar RNA host gene 18                               | -2.29 |
| TNN        | tenascin N                                                     | -2.29 |
| RASSF9     | Ras association domain family member 9                         | -2.3  |
| SLC24A3    | solute carrier family 24 member 3                              | -2.3  |
| WDR72      | WD repeat domain 72                                            | -2.3  |
| ZNF141     | zinc finger protein 141                                        | -2.3  |
| ENPP2      | ectonucleotide pyrophosphatase/phosphodiesterase 2             | -2.31 |
| TSLP       | thymic stromal lymphopietin                                    | -2.31 |
| CD300LG    | CD300 molecule like family member g                            | -2.32 |
| ELOVL7     | ELOVL fatty acid elongase 7                                    | -2.32 |
| FBP1       | fructose-bisphosphatase 1                                      | -2.32 |
| IGFALS     | insulin like growth factor binding protein acid labile subunit | -2.32 |
| LOC200772  | uncharacterized LOC200772                                      | -2.32 |
| TSPYL5     | TSPY like 5                                                    | -2.32 |
| BCL2A1     | BCL2 related protein A1                                        | -2.33 |
| CFAP251    | cilia and flagella associated protein 251                      | -2.33 |
| IL7R       | interleukin 7 receptor                                         | -2.33 |
| ITGB6      | integrin subunit beta 6                                        | -2.33 |
| MAPK10     | mitogen-activated protein kinase 10                            | -2.33 |
| NIBAN3     | niban apoptosis regulator 3                                    | -2.33 |
| SERPINB8   | serpin family B member 8                                       | -2.33 |

|              |                                                                  |       |
|--------------|------------------------------------------------------------------|-------|
| ADRA1A       | adrenoceptor alpha 1A                                            | -2.34 |
| FMOD         | fibromodulin                                                     | -2.34 |
| FAM9B        | family with sequence similarity 9 member B                       | -2.35 |
| S100A14      | S100 calcium binding protein A14                                 | -2.35 |
| TNFSF11      | TNF superfamily member 11                                        | -2.35 |
| TNFRSF13C    | TNF receptor superfamily member 13C                              | -2.36 |
| IGFBP6       | insulin like growth factor binding protein 6                     | -2.37 |
| PKNOX2       | PBX/knotted 1 homeobox 2                                         | -2.37 |
| RP3_342P202  |                                                                  | -2.37 |
| FAM160A1     | family with sequence similarity 160 member A1                    | -2.38 |
| KIF19        | kinesin family member 19                                         | -2.38 |
| PELI2        | pellino E3 ubiquitin protein ligase family member 2              | -2.38 |
| ADIRF        | adipogenesis regulatory factor                                   | -2.39 |
| AC0936421    |                                                                  | -2.4  |
| CD300LB      | CD300 molecule like family member b                              | -2.4  |
| IGHM         | immunoglobulin heavy constant mu                                 | -2.4  |
| SAA4         | serum amyloid A4, constitutive                                   | -2.4  |
| TUSC3        | tumor suppressor candidate 3                                     | -2.4  |
| MYC          | MYC proto-oncogene, bHLH transcription factor                    | -2.41 |
| TRPV3        | transient receptor potential cation channel subfamily V member 3 | -2.41 |
| ABI3BP       | ABI family member 3 binding protein                              | -2.42 |
| B3GNT3       | UDP-GlcNAc:betaGal beta-1,3-N-acetylglucosaminyltransferase 3    | -2.42 |
| MAP9         | microtubule associated protein 9                                 | -2.42 |
| PCDHGB4      | protocadherin gamma subfamily B, 4                               | -2.42 |
| PRG4         | proteoglycan 4                                                   | -2.42 |
| ADRA2A       | adrenoceptor alpha 2A                                            | -2.43 |
| APCDD1       | APC down-regulated 1                                             | -2.43 |
| CCR4         | C-C motif chemokine receptor 4                                   | -2.43 |
| HUNK         | hormonally up-regulated Neu-associated kinase                    | -2.43 |
| LOC100506688 | uncharacterized LOC100506688                                     | -2.43 |
| MMRN1        | multimerin 1                                                     | -2.43 |
| PLAUR        | plasminogen activator, urokinase receptor                        | -2.43 |
| BANK1        | B cell scaffold protein with ankyrin repeats 1                   | -2.44 |
| CD300E       | CD300e molecule                                                  | -2.44 |
| GDF6         | growth differentiation factor 6                                  | -2.44 |
| KIF5C        | kinesin family member 5C                                         | -2.44 |
| MZB1         | marginal zone B and B1 cell specific protein                     | -2.44 |
| SGCA         | sarcoglycan alpha                                                | -2.44 |
| C13orf46     | chromosome 13 open reading frame 46                              | -2.45 |
| CPXM2        | carboxypeptidase X, M14 family member 2                          | -2.45 |
| IGHG2        | immunoglobulin heavy constant gamma 2 (G2m marker)               | -2.46 |
| ITLN1        | intelectin 1                                                     | -2.46 |
| TNFRSF11B    | TNF receptor superfamily member 11b                              | -2.46 |
| TUB          | TUB bipartite transcription factor                               | -2.46 |
| COL6A6       | collagen type VI alpha 6 chain                                   | -2.47 |
| LOXL4        | lysyl oxidase like 4                                             | -2.47 |
| LRRN3        | leucine rich repeat neuronal 3                                   | -2.47 |
| NTRK2        | neurotrophic receptor tyrosine kinase 2                          | -2.47 |
| RTL5         | retrotransposon Gag like 5                                       | -2.47 |
| CHI3L1       | chitinase 3 like 1                                               | -2.48 |
| IGHD         | immunoglobulin heavy constant delta                              | -2.48 |
| LILRA5       | leukocyte immunoglobulin like receptor A5                        | -2.48 |
| NOCT         | nocturnin                                                        | -2.48 |
| OMD          | osteomodulin                                                     | -2.48 |
| RP11_210M152 |                                                                  | -2.48 |
| BICC1        | BicC family RNA binding protein 1                                | -2.49 |
| C1orf116     | chromosome 1 open reading frame 116                              | -2.49 |

|               |                                                            |       |
|---------------|------------------------------------------------------------|-------|
| CAND2         | cullin associated and neddylation dissociated 2 (putative) | -2.49 |
| IGKV2-30      | immunoglobulin kappa variable 2-30                         | -2.49 |
| LRRC4C        | leucine rich repeat containing 4C                          | -2.49 |
| SERPINE1      | serpin family E member 1                                   | -2.49 |
| TPPP3         | tubulin polymerization promoting protein family member 3   | -2.49 |
| SOD3          | superoxide dismutase 3                                     | -2.5  |
| TUBBP5        | tubulin beta pseudogene 5                                  | -2.5  |
| APOBEC3A      | apolipoprotein B mRNA editing enzyme catalytic subunit 3A  | -2.51 |
| CRACD         | capping protein inhibiting regulator of actin dynamics     | -2.51 |
| ECM1          | extracellular matrix protein 1                             | -2.51 |
| FMO2          | flavin containing dimethylaniline monooxygenase 2          | -2.51 |
| GPR183        | G protein-coupled receptor 183                             | -2.51 |
| IGHA1         | immunoglobulin heavy constant alpha 1                      | -2.51 |
| IGHV4-34      | immunoglobulin heavy variable 4-34                         | -2.51 |
| LINC01348     | long intergenic non-protein coding RNA 1348                | -2.51 |
| OLFML3        | olfactomedin like 3                                        | -2.51 |
| MIRLET7A1HG   |                                                            | -2.52 |
| RGS2          | regulator of G protein signaling 2                         | -2.52 |
| BCO2          | beta-carotene oxygenase 2                                  | -2.53 |
| DSEL          | dermatan sulfate epimerase like                            | -2.53 |
| FAM30A        | family with sequence similarity 30 member A                | -2.53 |
| CETP          | cholesteryl ester transfer protein                         | -2.54 |
| CILP2         | cartilage intermediate layer protein 2                     | -2.54 |
| GGT5          | gamma-glutamyltransferase 5                                | -2.54 |
| LINC01679     | long intergenic non-protein coding RNA 1679                | -2.54 |
| MYOM2         | myomesin 2                                                 | -2.54 |
| SCD5          | stearoyl-CoA desaturase 5                                  | -2.54 |
| TREH          | trehalase                                                  | -2.54 |
| EPHA3         | EPH receptor A3                                            | -2.55 |
| UCA1          | urothelial cancer associated 1                             | -2.55 |
| ADAMTS9-AS2   | ADAMTS9 antisense RNA 2                                    | -2.56 |
| CDA           | cytidine deaminase                                         | -2.56 |
| CYFIP2        | cytoplasmic FMR1 interacting protein 2                     | -2.56 |
| NAV2-AS1      | NAV2 antisense RNA 1                                       | -2.56 |
| PITPNM3       | PITPNM family member 3                                     | -2.56 |
| RDH16         | retinol dehydrogenase 16                                   | -2.56 |
| SLC22A1       | solute carrier family 22 member 1                          | -2.56 |
| SLC22A17      | solute carrier family 22 member 17                         | -2.56 |
| DNAH2         | dynein axonemal heavy chain 2                              | -2.57 |
| F3            | coagulation factor III, tissue factor                      | -2.57 |
| GAS1          | growth arrest specific 1                                   | -2.58 |
| MS4A1         | membrane spanning 4-domains A1                             | -2.58 |
| S100A8        | S100 calcium binding protein A8                            | -2.58 |
| SLC2A9        | solute carrier family 2 member 9                           | -2.58 |
| SLFN13        | schlafen family member 13                                  | -2.58 |
| VNN3          | vanin 3                                                    | -2.58 |
| ADGRG7        | adhesion G protein-coupled receptor G7                     | -2.59 |
| EGR3          | early growth response 3                                    | -2.59 |
| KCND3         | potassium voltage-gated channel subfamily D member 3       | -2.59 |
| PLXNA4        | plexin A4                                                  | -2.59 |
| SELP          | selectin P                                                 | -2.59 |
| SLCO4A1       | solute carrier organic anion transporter family member 4A1 | -2.59 |
| CTTNBP2       | cortactin binding protein 2                                | -2.6  |
| POU2AF1       | POU class 2 homeobox associating factor 1                  | -2.6  |
| CA2           | carbonic anhydrase 2                                       | -2.61 |
| STK33         | serine/threonine kinase 33                                 | -2.61 |
| FCGR3A/FCGR3B | Fc fragment of IgG receptor IIIa                           | -2.62 |

|                  |                                                                            |       |
|------------------|----------------------------------------------------------------------------|-------|
| HR               | HR lysine demethylase and nuclear receptor corepressor                     | -2.62 |
| IGF2-AS          | IGF2 antisense RNA                                                         | -2.62 |
| XXbac-BPG32J3.22 |                                                                            | -2.62 |
| ANK2             | ankyrin 2                                                                  | -2.63 |
| IGHV3-48         | immunoglobulin heavy variable 3-48                                         | -2.63 |
| LYVE1            | lymphatic vessel endothelial hyaluronan receptor 1                         | -2.63 |
| NPY1R            | neuropeptide Y receptor Y1                                                 | -2.63 |
| CNTN4            | contactin 4                                                                | -2.64 |
| MT1X             | metallothionein 1X                                                         | -2.64 |
| EGR1             | early growth response 1                                                    | -2.65 |
| A2M              | alpha-2-macroglobulin                                                      | -2.66 |
| PRELP            | proline and arginine rich end leucine rich repeat protein                  | -2.66 |
| RET              | ret proto-oncogene                                                         | -2.66 |
| MT2A             | metallothionein 2A                                                         | -2.67 |
| SAA2             | serum amyloid A2                                                           | -2.68 |
| COL25A1          | collagen type XXV alpha 1 chain                                            | -2.69 |
| FAM180A          | family with sequence similarity 180 member A                               | -2.69 |
| IGFBP3           | insulin like growth factor binding protein 3                               | -2.69 |
| RP11-403F21.4    |                                                                            | -2.69 |
| AC1448311        |                                                                            | -2.7  |
| EPHB1            | EPH receptor B1                                                            | -2.7  |
| FENDRR           | FOXF1 adjacent non-coding developmental regulatory RNA                     | -2.7  |
| IGHV3-53         | immunoglobulin heavy variable 3-53                                         | -2.7  |
| PTN              | pleiotrophin                                                               | -2.7  |
| RND3             | Rho family GTPase 3                                                        | -2.7  |
| SHBG             | sex hormone binding globulin                                               | -2.7  |
| PROM2            | prominin 2                                                                 | -2.71 |
| ANGPTL6          | angiopoietin like 6                                                        | -2.72 |
| SHISAL1          | shisa like 1                                                               | -2.72 |
| ANKRD36BP2       | ankyrin repeat domain 36B pseudogene 2                                     | -2.73 |
| CFAP221          | cilia and flagella associated protein 221                                  | -2.73 |
| GALNT3           | polypeptide N-acetylgalactosaminyltransferase 3                            | -2.73 |
| PTH1R            | parathyroid hormone 1 receptor                                             | -2.73 |
| RIPOR3           | RIPOR family member 3                                                      | -2.73 |
| PDZRN3           | PDZ domain containing ring finger 3                                        | -2.74 |
| AC139491.7       |                                                                            | -2.75 |
| ADH4             | alcohol dehydrogenase 4 (class II), pi polypeptide                         | -2.75 |
| ANGPTL1          | angiopoietin like 1                                                        | -2.75 |
| ANKRD1           | ankyrin repeat domain 1                                                    | -2.75 |
| ASS1             | argininosuccinate synthase 1                                               | -2.75 |
| C6orf132         | chromosome 6 open reading frame 132                                        | -2.75 |
| FLRT2            | fibronectin leucine rich transmembrane protein 2                           | -2.75 |
| IGKV3-15         | immunoglobulin kappa variable 3-15                                         | -2.75 |
| IGLV1-51         | immunoglobulin lambda variable 1-51                                        | -2.75 |
| SLC22A10         | solute carrier family 22 member 10                                         | -2.75 |
| IGHG3            | immunoglobulin heavy constant gamma 3 (G3m marker)                         | -2.76 |
| IGHV3-11         | immunoglobulin heavy variable 3-11 (gene/pseudogene)                       | -2.76 |
| NNMT             | nicotinamide N-methyltransferase                                           | -2.76 |
| HSPB8            | heat shock protein family B (small) member 8                               | -2.77 |
| LIF              | LIF interleukin 6 family cytokine                                          | -2.77 |
| EFNB3            | ephrin B3                                                                  | -2.78 |
| SDCBP2           | syndecan binding protein 2                                                 | -2.78 |
| GLB1L2           | galactosidase beta 1 like 2                                                | -2.79 |
| NGFR             | nerve growth factor receptor                                               | -2.79 |
| SIGLEC5          | sialic acid binding Ig like lectin 5                                       | -2.79 |
| SVEP1            | sushi, von Willebrand factor type A, EGF and pentraxin domain containing 1 | -2.79 |
| EVC2             | EvC ciliary complex subunit 2                                              | -2.8  |

|                 |                                                                   |       |
|-----------------|-------------------------------------------------------------------|-------|
| FAM153A/FAM153B | family with sequence similarity 153 member B                      | -2.8  |
| GGT1            | gamma-glutamyltransferase 1                                       | -2.8  |
| IRF4            | interferon regulatory factor 4                                    | -2.8  |
| MEDAG           | mesenteric estrogen dependent adipogenesis                        | -2.8  |
| PDGFRA          | platelet derived growth factor receptor alpha                     | -2.8  |
| PODN            | podocan                                                           | -2.8  |
| ACOT11          | acyl-CoA thioesterase 11                                          | -2.81 |
| CLSTN2          | calsyntenin 2                                                     | -2.81 |
| CRISPLD2        | cysteine rich secretory protein LCCL domain containing 2          | -2.81 |
| CXCL12          | C-X-C motif chemokine ligand 12                                   | -2.81 |
| ID1             | inhibitor of DNA binding 1, HLH protein                           | -2.81 |
| IGLV1-47        | immunoglobulin lambda variable 1-47                               | -2.81 |
| IGLV2-8         | immunoglobulin lambda variable 2-8                                | -2.81 |
| TRMT9B          | tRNA methyltransferase 9B (putative)                              | -2.81 |
| IGHA2           | immunoglobulin heavy constant alpha 2 (A2m marker)                | -2.82 |
| CD79A           | CD79a molecule                                                    | -2.83 |
| CTD_2033D152    |                                                                   | -2.83 |
| SCTR            | secretin receptor                                                 | -2.83 |
| VIPR1           | vasoactive intestinal peptide receptor 1                          | -2.83 |
| APOF            | apolipoprotein F                                                  | -2.84 |
| BSPRY           | B-box and SPRY domain containing                                  | -2.84 |
| EPHA2           | EPH receptor A2                                                   | -2.84 |
| FCRL5           | Fc receptor like 5                                                | -2.84 |
| GULP1           | GULP PTB domain containing engulfment adaptor 1                   | -2.84 |
| INMT            | indolethylamine N-methyltransferase                               | -2.84 |
| DACT2           | dishevelled binding antagonist of beta catenin 2                  | -2.85 |
| UPP2            | uridine phosphorylase 2                                           | -2.85 |
| LIFR            | LIF receptor subunit alpha                                        | -2.86 |
| FOXP2           | forkhead box P2                                                   | -2.87 |
| IGLC2           | immunoglobulin lambda constant 2                                  | -2.87 |
| CCDC8           | coiled-coil domain containing 8                                   | -2.88 |
| KIF1A           | kinesin family member 1A                                          | -2.88 |
| IGHV3-43        | immunoglobulin heavy variable 3-43                                | -2.89 |
| C11orf96        | chromosome 11 open reading frame 96                               | -2.9  |
| RASEF           | RAS and EF-hand domain containing                                 | -2.9  |
| SLCO4C1         | solute carrier organic anion transporter family member 4C1        | -2.9  |
| TENM4           | teneurin transmembrane protein 4                                  | -2.9  |
| TPBG            | trophoblast glycoprotein                                          | -2.9  |
| CXCL5           | C-X-C motif chemokine ligand 5                                    | -2.91 |
| HHIP-AS1        | HHIP antisense RNA 1                                              | -2.91 |
| IGHV2-5         | immunoglobulin heavy variable 2-5                                 | -2.91 |
| MMP19           | matrix metalloproteinase 19                                       | -2.91 |
| SPP2            | secreted phosphoprotein 2                                         | -2.91 |
| CLTRN           | collectrin, amino acid transport regulator                        | -2.92 |
| CPZ             | carboxypeptidase Z                                                | -2.92 |
| DIO3OS          | DIO3 opposite strand upstream RNA                                 | -2.92 |
| GEM             | GTP binding protein overexpressed in skeletal muscle              | -2.92 |
| IGHV4-39        | immunoglobulin heavy variable 4-39                                | -2.92 |
| PLGLA           | plasminogen like A (pseudogene)                                   | -2.92 |
| CXCL8           | C-X-C motif chemokine ligand 8                                    | -2.93 |
| LOC100132813    | uncharacterized LOC100132813                                      | -2.93 |
| ROBO2           | roundabout guidance receptor 2                                    | -2.93 |
| SAMD5           | sterile alpha motif domain containing 5                           | -2.93 |
| IGHV3-23        | immunoglobulin heavy variable 3-23                                | -2.95 |
| PEG3            | paternally expressed 3                                            | -2.95 |
| PAMR1           | peptidase domain containing associated with muscle regeneration 1 | -2.96 |
| SCN7A           | sodium voltage-gated channel alpha subunit 7                      | -2.96 |



|             |                                                                  |       |
|-------------|------------------------------------------------------------------|-------|
| FAM201A     | family with sequence similarity 201 member A                     | -2.97 |
| ISLR        | immunoglobulin superfamily containing leucine rich repeat        | -2.97 |
| IGHV3-20    | immunoglobulin heavy variable 3-20                               | -2.98 |
| ALLC        | allantoicase                                                     | -3    |
| BLK         | BLK proto-oncogene, Src family tyrosine kinase                   | -3    |
| DLK1        | delta like non-canonical Notch ligand 1                          | -3    |
| IGLC3       | immunoglobulin lambda constant 3 (Kern-Oz+ marker)               | -3    |
| ATOX1       | atonal bHLH transcription factor 8                               | -3.01 |
| DACH1       | dachshund family transcription factor 1                          | -3.01 |
| FPR1        | formyl peptide receptor 1                                        | -3.01 |
| IGLL1/IGLL5 | immunoglobulin lambda like polypeptide 1                         | -3.01 |
| URO1        | urocanate hydratase 1                                            | -3.01 |
| TCF21       | transcription factor 21                                          | -3.02 |
| ADGRB3      | adhesion G protein-coupled receptor B3                           | -3.03 |
| CDH19       | cadherin 19                                                      | -3.03 |
| LPAR1       | lysophosphatidic acid receptor 1                                 | -3.03 |
| RBP1        | retinol binding protein 1                                        | -3.03 |
| ADAR2       | adenosine deaminase RNA specific B2 (inactive)                   | -3.04 |
| JCHAIN      | joining chain of multimeric IgA and IgM                          | -3.04 |
| CCN5        | cellular communication network factor 5                          | -3.05 |
| GALNT17     | polypeptide N-acetylgalactosaminyltransferase 17                 | -3.05 |
| IGLV3-25    | immunoglobulin lambda variable 3-25                              | -3.05 |
| MOGAT2      | monoacylglycerol O-acyltransferase 2                             | -3.05 |
| PLEKHA7     | pleckstrin homology domain containing B1                         | -3.05 |
| DSCAM1      | DS cell adhesion molecule like 1                                 | -3.06 |
| NEBL        | nebulin                                                          | -3.06 |
| SLC3A1      | solute carrier family 3 member 1                                 | -3.06 |
| DMKN        | dermokine                                                        | -3.07 |
| LINC01814   | long intergenic non-protein coding RNA 1814                      | -3.07 |
| TENM1       | teneurin transmembrane protein 1                                 | -3.07 |
| BMP5        | bone morphogenetic protein 5                                     | -3.08 |
| COLEC11     | collectin subfamily member 11                                    | -3.08 |
| ST6GAL2     | ST6 beta-galactoside alpha-2,6-sialyltransferase 2               | -3.08 |
| LINC01093   | long intergenic non-protein coding RNA 1093                      | -3.09 |
| RP11_256L63 |                                                                  | -3.09 |
| DLGAP2      | DLG associated protein 2                                         | -3.1  |
| RASAL1      | RAS protein activator like 1                                     | -3.1  |
| STEAP4      | STEAP4 metalloproteinase                                         | -3.1  |
| C6orf141    | chromosome 6 open reading frame 141                              | -3.11 |
| CYP2B7P     | cytochrome P450 family 2 subfamily B member 7, pseudogene        | -3.11 |
| ENPP5       | ectonucleotide pyrophosphatase/phosphodiesterase family member 5 | -3.11 |
| IGHV3-73    | immunoglobulin heavy variable 3-73                               | -3.11 |
| NXF3        | nuclear RNA export factor 3                                      | -3.11 |
| TGFA        | transforming growth factor alpha                                 | -3.11 |
| ZDBF2       | zinc finger DBF-type containing 2                                | -3.11 |
| IGHV3-15    | immunoglobulin heavy variable 3-15                               | -3.12 |
| IGHV3-33    | immunoglobulin heavy variable 3-33                               | -3.12 |
| IGKC        | immunoglobulin kappa constant                                    | -3.12 |
| NPC1L1      | NPC1 like intracellular cholesterol transporter 1                | -3.12 |
| TNR         | tenascin R                                                       | -3.12 |
| GRM8        | glutamate metabotropic receptor 8                                | -3.13 |
| IGKV4-1     | immunoglobulin kappa variable 4-1                                | -3.13 |
| IGLC1       | immunoglobulin lambda constant 1                                 | -3.13 |
| CDS1        | CDP-diacylglycerol synthase 1                                    | -3.14 |
| IGKV1-5     | immunoglobulin kappa variable 1-5                                | -3.14 |
| KRT7-AS     | KRT7 antisense RNA 1                                             | -3.14 |
| EVC         | EvC ciliary complex subunit 1                                    | -3.16 |

|               |                                                                     |       |
|---------------|---------------------------------------------------------------------|-------|
| KCNJ15        | potassium inwardly rectifying channel subfamily J member 15         | -3.17 |
| ANO3          | anoctamin 3                                                         | -3.18 |
| C1QTNF1       | C1q and TNF related 1                                               | -3.18 |
| ID4           | inhibitor of DNA binding 4, HLH protein                             | -3.18 |
| IGLV1-40      | immunoglobulin lambda variable 1-40                                 | -3.18 |
| IGLV3-1       | immunoglobulin lambda variable 3-1                                  | -3.18 |
| RP11_34A143   |                                                                     | -3.18 |
| TMEM45A       | transmembrane protein 45A                                           | -3.18 |
| IGHV4-61      | immunoglobulin heavy variable 4-61                                  | -3.19 |
| PLGLB1/PLGLB2 | plasminogen like B2                                                 | -3.19 |
| RND2          | Rho family GTPase 2                                                 | -3.19 |
| IGHV3-74      | immunoglobulin heavy variable 3-74                                  | -3.2  |
| BMPER         | BMP binding endothelial regulator                                   | -3.21 |
| RETREG1       | reticulophagy regulator 1                                           | -3.21 |
| TMEM200C      | transmembrane protein 200C                                          | -3.21 |
| CCL2          | C-C motif chemokine ligand 2                                        | -3.22 |
| IDO2          | indoleamine 2,3-dioxygenase 2                                       | -3.22 |
| MFSD2A        | major facilitator superfamily domain containing 2A                  | -3.22 |
| CD5L          | CD5 molecule like                                                   | -3.23 |
| GPM6A         | glycoprotein M6A                                                    | -3.24 |
| IGHV3-7       | immunoglobulin heavy variable 3-7                                   | -3.25 |
| IGHV3-21      | immunoglobulin heavy variable 3-21                                  | -3.26 |
| ITIH5         | inter-alpha-trypsin inhibitor heavy chain 5                         | -3.27 |
| LRRC7         | leucine rich repeat containing 7                                    | -3.27 |
| NR4A3         | nuclear receptor subfamily 4 group A member 3                       | -3.27 |
| CH17_360D52   |                                                                     | -3.28 |
| PTPN13        | protein tyrosine phosphatase non-receptor type 13                   | -3.28 |
| IGHV1-18      | immunoglobulin heavy variable 1-18                                  | -3.29 |
| IQCA1         | IQ motif containing with AAA domain 1                               | -3.29 |
| IGHV3-30      | immunoglobulin heavy variable 3-30                                  | -3.3  |
| IGLV2-14      | immunoglobulin lambda variable 2-14                                 | -3.3  |
| UNC93A        | unc-93 homolog A                                                    | -3.3  |
| ABCA13        | ATP binding cassette subfamily A member 13                          | -3.31 |
| IGHV5-51      | immunoglobulin heavy variable 5-51                                  | -3.31 |
| LGALS9C       | galectin 9C                                                         | -3.31 |
| SOCS3         | suppressor of cytokine signaling 3                                  | -3.31 |
| MT1L          | metallothionein 1L, pseudogene                                      | -3.32 |
| NALCN         | sodium leak channel, non-selective                                  | -3.32 |
| DNM3OS        | DNM3 opposite strand/antisense RNA                                  | -3.33 |
| MT1E          | metallothionein 1E                                                  | -3.33 |
| PLCXD3        | phosphatidylinositol specific phospholipase C X domain containing 3 | -3.33 |
| LY6E          | lymphocyte antigen 6 family member E                                | -3.34 |
| STMN2         | stathmin 2                                                          | -3.34 |
| TMEM82        | transmembrane protein 82                                            | -3.34 |
| IGLV4-69      | immunoglobulin lambda variable 4-69                                 | -3.35 |
| PKHD1         | PKHD1 ciliary IPT domain containing fibrocystin/polyductin          | -3.35 |
| C7            | complement C7                                                       | -3.36 |
| LOC105375304  | uncharacterized LOC105375304                                        | -3.36 |
| NPTX2         | neuronal pentraxin 2                                                | -3.36 |
| SEC14L6       | SEC14 like lipid binding 6                                          | -3.36 |
| TMC4          | transmembrane channel like 4                                        | -3.36 |
| GPRC5A        | G protein-coupled receptor class C group 5 member A                 | -3.37 |
| IGHG1         | immunoglobulin heavy constant gamma 1 (G1m marker)                  | -3.37 |
| SPINT2        | serine peptidase inhibitor, Kunitz type 2                           | -3.37 |
| IL1B          | interleukin 1 beta                                                  | -3.38 |
| LOC105375431  |                                                                     | -3.38 |
| PDZRN4        | PDZ domain containing ring finger 4                                 | -3.38 |

|              |                                                                  |       |
|--------------|------------------------------------------------------------------|-------|
| IGHV1-69D    | immunoglobulin heavy variable 1-69D                              | -3.39 |
| LINC00907    | long intergenic non-protein coding RNA 907                       | -3.39 |
| LINC01320    |                                                                  | -3.39 |
| IGKV1D-39    | immunoglobulin kappa variable 1D-39                              | -3.4  |
| KBTBD11-OT1  | KBTBD11 overlapping transcript 1                                 | -3.4  |
| TMEM154      | transmembrane protein 154                                        | -3.4  |
| RPS6KA6      | ribosomal protein S6 kinase A6                                   | -3.41 |
| SRPX         | sushi repeat containing protein X-linked                         | -3.41 |
| CNTN3        | contactin 3                                                      | -3.42 |
| IGKV3-11     | immunoglobulin kappa variable 3-11                               | -3.42 |
| TMEM132E     | transmembrane protein 132E                                       | -3.42 |
| CASR         | calcium sensing receptor                                         | -3.43 |
| PTGIS        | prostaglandin I2 synthase                                        | -3.43 |
| HGF          | hepatocyte growth factor                                         | -3.44 |
| PLPP2        | phospholipid phosphatase 2                                       | -3.44 |
| IGLV3-10     | immunoglobulin lambda variable 3-10                              | -3.45 |
| IGHV4-59     | immunoglobulin heavy variable 4-59                               | -3.46 |
| TRPV4        | transient receptor potential cation channel subfamily V member 4 | -3.46 |
| IGHV1-2      | immunoglobulin heavy variable 1-2                                | -3.47 |
| IGHV1-46     | immunoglobulin heavy variable 1-46                               | -3.47 |
| IGKV1-12     | immunoglobulin kappa variable 1-12                               | -3.47 |
| ZBTB45P1     | zinc finger and BTB domain containing 45 pseudogene 1            | -3.47 |
| FOS          | Fos proto-oncogene, AP-1 transcription factor subunit            | -3.48 |
| FPR2         | formyl peptide receptor 2                                        | -3.48 |
| IGKV3-20     | immunoglobulin kappa variable 3-20                               | -3.48 |
| LIPH         | lipase H                                                         | -3.48 |
| CA9          | carbonic anhydrase 9                                             | -3.49 |
| FRAS1        | Fraser extracellular matrix complex subunit 1                    | -3.49 |
| IGKV1-33     | immunoglobulin kappa variable 1-33                               | -3.49 |
| SLC25A47     | solute carrier family 25 member 47                               | -3.49 |
| BEX2         | brain expressed X-linked 2                                       | -3.51 |
| IGLV3-19     | immunoglobulin lambda variable 3-19                              | -3.51 |
| VEPH1        | ventricular zone expressed PH domain containing 1                | -3.51 |
| FGFR2        | fibroblast growth factor receptor 2                              | -3.52 |
| IGHV3-13     | immunoglobulin heavy variable 3-13                               | -3.52 |
| CXCR2        | C-X-C motif chemokine receptor 2                                 | -3.53 |
| CYP39A1      | cytochrome P450 family 39 subfamily A member 1                   | -3.53 |
| HAND2-AS1    | HAND2 antisense RNA 1                                            | -3.53 |
| IGKV1-6      | immunoglobulin kappa variable 1-6                                | -3.54 |
| LINC01152    | long intergenic non-protein coding RNA 1152                      | -3.54 |
| PRSS3        | serine protease 3                                                | -3.54 |
| FOSL1        | FOS like 1, AP-1 transcription factor subunit                    | -3.55 |
| FAM163B      | family with sequence similarity 163 member B                     | -3.56 |
| SFRP1        | secreted frizzled related protein 1                              | -3.56 |
| IGLV3-9      | immunoglobulin lambda variable 3-9 (gene/pseudogene)             | -3.57 |
| IL6          | interleukin 6                                                    | -3.57 |
| NCAM1        | neural cell adhesion molecule 1                                  | -3.58 |
| THRSP        | thyroid hormone responsive                                       | -3.58 |
| CCL21        | C-C motif chemokine ligand 21                                    | -3.59 |
| CTD_2033D153 |                                                                  | -3.59 |
| TREM1        | triggering receptor expressed on myeloid cells 1                 | -3.59 |
| FAM167A      | family with sequence similarity 167 member A                     | -3.6  |
| IGLV2-11     | immunoglobulin lambda variable 2-11                              | -3.6  |
| CXCL1        | C-X-C motif chemokine ligand 1                                   | -3.61 |
| IGKV1-8      | immunoglobulin kappa variable 1-8                                | -3.61 |
| CNTFR        | ciliary neurotrophic factor receptor                             | -3.62 |
| IGLV2-23     | immunoglobulin lambda variable 2-23                              | -3.62 |

|              |                                                      |       |
|--------------|------------------------------------------------------|-------|
| IGLV3-21     | immunoglobulin lambda variable 3-21                  | -3.62 |
| KRT17P4      | keratin 17 pseudogene 4                              | -3.62 |
| TDRD15       | tudor domain containing 15                           | -3.62 |
| IGLV1-44     | immunoglobulin lambda variable 1-44                  | -3.63 |
| IL1RL1       | interleukin 1 receptor like 1                        | -3.63 |
| CHRM2        | cholinergic receptor muscarinic 2                    | -3.64 |
| DCN          | decorin                                              | -3.64 |
| RAB36        | RAB36, member RAS oncogene family                    | -3.64 |
| TIMD4        | T cell immunoglobulin and mucin domain containing 4  | -3.65 |
| FAM95C       | family with sequence similarity 95 member C          | -3.67 |
| PKHD1L1      | PKHD1 like 1                                         | -3.69 |
| B3GAT1       | beta-1,3-glucuronyltransferase 1                     | -3.7  |
| ADAMTSL2     | ADAMTS like 2                                        | -3.71 |
| TBX15        | T-box transcription factor 15                        | -3.71 |
| MT1G         | metallothionein 1G                                   | -3.72 |
| TFPI2        | tissue factor pathway inhibitor 2                    | -3.72 |
| THBS1        | thrombospondin 1                                     | -3.72 |
| IGKV2-24     | immunoglobulin kappa variable 2-24                   | -3.74 |
| MFAP4        | microfibril associated protein 4                     | -3.74 |
| POF1B        | POF1B actin binding protein                          | -3.74 |
| CALN1        | calneuron 1                                          | -3.75 |
| IGKV2-28     | immunoglobulin kappa variable 2-28                   | -3.75 |
| LAMA1        | laminin subunit alpha 1                              | -3.75 |
| CYP26A1      | cytochrome P450 family 26 subfamily A member 1       | -3.76 |
| FREM1        | FRAS1 related extracellular matrix 1                 | -3.76 |
| LOC105371267 | p53-regulated lncRNA 1                               | -3.78 |
| ANKRD18A     | ankyrin repeat domain 18A                            | -3.79 |
| CHRD1        | chordin like 1                                       | -3.79 |
| IGHV3-49     | immunoglobulin heavy variable 3-49                   | -3.8  |
| IGLV7-43     | immunoglobulin lambda variable 7-43                  | -3.8  |
| RGS4         | regulator of G protein signaling 4                   | -3.8  |
| GLP2R        | glucagon like peptide 2 receptor                     | -3.82 |
| GFPT2        | glutamine-fructose-6-phosphate transaminase 2        | -3.83 |
| WNT9A        | Wnt family member 9A                                 | -3.83 |
| EPO          | erythropoietin                                       | -3.85 |
| HAS2         | hyaluronan synthase 2                                | -3.85 |
| HAND2        | heart and neural crest derivatives expressed 2       | -3.87 |
| IGLV8-61     | immunoglobulin lambda variable 8-61                  | -3.87 |
| SCARA5       | scavenger receptor class A member 5                  | -3.87 |
| ANXA3        | annexin A3                                           | -3.88 |
| PDX1         | pancreatic and duodenal homeobox 1                   | -3.88 |
| CRHBP        | corticotropin releasing hormone binding protein      | -3.89 |
| IGKV1-9      | immunoglobulin kappa variable 1-9                    | -3.89 |
| KCNH8        | potassium voltage-gated channel subfamily H member 8 | -3.89 |
| PTGS2        | prostaglandin-endoperoxide synthase 2                | -3.91 |
| MUC5B        | mucin 5B, oligomeric mucus/gel-forming               | -3.93 |
| IGHV1-24     | immunoglobulin heavy variable 1-24                   | -3.95 |
| CCL19        | C-C motif chemokine ligand 19                        | -3.96 |
| ESRRG        | estrogen related receptor gamma                      | -3.96 |
| FCN3         | ficolin 3                                            | -3.96 |
| FXVD2        | FXVD domain containing ion transport regulator 2     | -3.96 |
| MT1F         | metallothionein 1F                                   | -4.03 |
| RSPO3        | R-spondin 3                                          | -4.03 |
| IGHG4        | immunoglobulin heavy constant gamma 4 (G4m marker)   | -4.04 |
| NDST3        | N-deacetylase and N-sulfotransferase 3               | -4.04 |
| SPINT1       | serine peptidase inhibitor, Kunitz type 1            | -4.05 |
| HHIP         | hedgehog interacting protein                         | -4.07 |

|               |                                                                  |       |
|---------------|------------------------------------------------------------------|-------|
| IGKV1-17      | immunoglobulin kappa variable 1-17                               | -4.08 |
| EFNA5         | ephrin A5                                                        | -4.1  |
| MUC3A         | mucin 3A, cell surface associated                                | -4.16 |
| LINC01979     | long intergenic non-protein coding RNA 1979                      | -4.17 |
| RP4_568C114   |                                                                  | -4.18 |
| IGHV1-69      | immunoglobulin heavy variable 1-69                               | -4.22 |
| LINC02027     | long intergenic non-protein coding RNA 2027                      | -4.23 |
| CYP1A2        | cytochrome P450 family 1 subfamily A member 2                    | -4.24 |
| ILDR1         | immunoglobulin like domain containing receptor 1                 | -4.24 |
| IGKV1-27      | immunoglobulin kappa variable 1-27                               | -4.25 |
| MT1M          | metallothionein 1M                                               | -4.26 |
| AJAP1         | adherens junctions associated protein 1                          | -4.27 |
| ARHGEF4       | Rho guanine nucleotide exchange factor 4                         | -4.3  |
| KRT80         | keratin 80                                                       | -4.3  |
| MT1H          | metallothionein 1H                                               | -4.3  |
| CLEC1B        | C-type lectin domain family 1 member B                           | -4.33 |
| SDS           | serine dehydratase                                               | -4.34 |
| BMPR1B        | bone morphogenetic protein receptor type 1B                      | -4.35 |
| IGHV6-1       | immunoglobulin heavy variable 6-1                                | -4.39 |
| IGKV1-16      | immunoglobulin kappa variable 1-16                               | -4.39 |
| GLRB          | glycine receptor beta                                            | -4.42 |
| HAMP          | hepcidin antimicrobial peptide                                   | -4.42 |
| CXCL14        | C-X-C motif chemokine ligand 14                                  | -4.43 |
| COLEC10       | collectin subfamily member 10                                    | -4.44 |
| GLS2          | glutaminase 2                                                    | -4.44 |
| SLC28A3       | solute carrier family 28 member 3                                | -4.48 |
| STAB2         | stabilin 2                                                       | -4.5  |
| MACC1         | MET transcriptional regulator MACC1                              | -4.51 |
| ANXA8/ANXA8L1 | annexin A8 like 1                                                | -4.53 |
| TAFA5         | TAFA chemokine like family member 5                              | -4.56 |
| PCLO          | piccolo presynaptic cytomatrix protein                           | -4.57 |
| DPT           | dermatopontin                                                    | -4.61 |
| EREG          | epiregulin                                                       | -4.61 |
| HSD17B13      | hydroxysteroid 17-beta dehydrogenase 13                          | -4.61 |
| ASPG          | asparaginase                                                     | -4.63 |
| BMP10         | bone morphogenetic protein 10                                    | -4.64 |
| IGF2          | insulin like growth factor 2                                     | -4.65 |
| CCBE1         | collagen and calcium binding EGF domains 1                       | -4.67 |
| ITGB8         | integrin subunit beta 8                                          | -4.68 |
| LAMC2         | laminin subunit gamma 2                                          | -4.69 |
| RIC3          | RIC3 acetylcholine receptor chaperone                            | -4.69 |
| EPS8L1        | EPS8 like 1                                                      | -4.7  |
| MARCO         | macrophage receptor with collagenous structure                   | -4.7  |
| CNKSR1        | connector enhancer of kinase suppressor of Ras 1                 | -4.75 |
| AP1M2         | adaptor related protein complex 1 subunit mu 2                   | -4.78 |
| B3GALT5       | beta-1,3-galactosyltransferase 5                                 | -4.82 |
| TRPV6         | transient receptor potential cation channel subfamily V member 6 | -4.82 |
| CYP2A6        | cytochrome P450 family 2 subfamily A member 6                    | -4.83 |
| KRT7          | keratin 7                                                        | -4.87 |
| CYS1          | cystin 1                                                         | -4.9  |
| MMP7          | matrix metalloproteinase 7                                       | -4.9  |
| C9            | complement C9                                                    | -4.91 |
| CAPN6         | calpain 6                                                        | -4.97 |
| FCN2          | ficolin 2                                                        | -4.97 |
| IGKV1-39      | immunoglobulin kappa variable 1-39 (gene/pseudogene)             | -4.97 |
| ANXA8/ANXA8L1 | annexin A8 like 1                                                | -5.04 |
| FGF23         | fibroblast growth factor 23                                      | -5.05 |

|           |                                                             |       |
|-----------|-------------------------------------------------------------|-------|
| SEMA3E    | semaphorin 3E                                               | -5.05 |
| SLC34A2   | solute carrier family 34 member 2                           | -5.08 |
| GGT6      | gamma-glutamyltransferase 6                                 | -5.1  |
| IL20RA    | interleukin 20 receptor subunit alpha                       | -5.13 |
| NRG1      | neuregulin 1                                                | -5.19 |
| ATP13A4   | ATPase 13A4                                                 | -5.23 |
| WNK2      | WNK lysine deficient protein kinase 2                       | -5.24 |
| PRSS8     | serine protease 8                                           | -5.28 |
| SYT13     | synaptotagmin 13                                            | -5.29 |
| GABRP     | gamma-aminobutyric acid type A receptor subunit pi          | -5.35 |
| SMIM24    | small integral membrane protein 24                          | -5.37 |
| SYT9      | synaptotagmin 9                                             | -5.41 |
| LINC01488 | long intergenic non-protein coding RNA 1488                 | -5.46 |
| FAM169B   | family with sequence similarity 169 member B                | -5.48 |
| CLEC4G    | C-type lectin domain family 4 member G                      | -5.58 |
| CLEC4M    | C-type lectin domain family 4 member M                      | -5.6  |
| TACSTD2   | tumor associated calcium signal transducer 2                | -5.6  |
| CXCL6     | C-X-C motif chemokine ligand 6                              | -5.64 |
| NPBWR1    | neuropeptides B and W receptor 1                            | -5.71 |
| BICDL2    | BICD family like cargo adaptor 2                            | -5.76 |
| ERVE-1    | endogenous retrovirus group E member 1                      | -5.78 |
| CLIC6     | chloride intracellular channel 6                            | -5.89 |
| FOSB      | FosB proto-oncogene, AP-1 transcription factor subunit      | -5.91 |
| MUC6      | mucin 6, oligomeric mucus/gel-forming                       | -5.94 |
| GPRIN2    | G protein regulated inducer of neurite outgrowth 2          | -6    |
| CDHR2     | cadherin related family member 2                            | -6.06 |
| PWWP3B    | PWWP domain containing 3B                                   | -6.12 |
| CLDN10    | claudin 10                                                  | -6.15 |
| FAM83F    | family with sequence similarity 83 member F                 | -6.16 |
| SFRP5     | secreted frizzled related protein 5                         | -6.26 |
| ESRP1     | epithelial splicing regulatory protein 1                    | -6.39 |
| GDF2      | growth differentiation factor 2                             | -6.39 |
| VTCN1     | V-set domain containing T cell activation inhibitor 1       | -6.42 |
| SLC5A1    | solute carrier family 5 member 1                            | -6.62 |
| GABRB3    | gamma-aminobutyric acid type A receptor subunit beta3       | -6.84 |
| PROM1     | prominin 1                                                  | -6.96 |
| GRHL2     | grainyhead like transcription factor 2                      | -7.05 |
| MYH4      | myosin heavy chain 4                                        | -7.05 |
| KCNJ16    | potassium inwardly rectifying channel subfamily J member 16 | -7.23 |
| SLC6A11   | solute carrier family 6 member 11                           | -7.24 |
| CHST4     | carbohydrate sulfotransferase 4                             | -7.25 |
| SLC6A19   | solute carrier family 6 member 19                           | -7.25 |
| EPCAM     | epithelial cell adhesion molecule                           | -7.34 |
| KRT19     | keratin 19                                                  | -7.46 |
| CFTR      | CF transmembrane conductance regulator                      | -7.61 |
| FREM2     | FRAS1 related extracellular matrix 2                        | -7.63 |

**Table S2.** Genes differentially expressed in HBV-HCC.

| Gene Symbol   | Entrez Gene Name                                      | Fold change |
|---------------|-------------------------------------------------------|-------------|
| AKR1B10       | aldo-keto reductase family 1 member B10               | 7.38        |
| AKR1B10P1     | aldo-keto reductase family 1 member B10 pseudogene 1  | 7.12        |
| NMRAL2P       | NmrA like redox sensor 2, pseudogene                  | 7.12        |
| EPS8L3        | EPS8 like 3                                           | 6.01        |
| SPINK1        | serine peptidase inhibitor Kazal type 1               | 5.95        |
| ALDH3A1       | aldehyde dehydrogenase 3 family member A1             | 5.39        |
| LCN2          | lipocalin 2                                           | 5.04        |
| TGM3          | transglutaminase 3                                    | 4.81        |
| SULT1C2       | sulfotransferase family 1C member 2                   | 4.48        |
| NRCAM         | neuronal cell adhesion molecule                       | 4.47        |
| GCNT3         | glucosaminyl (N-acetyl) transferase 3, mucin type     | 4.45        |
| SPP1          | secreted phosphoprotein 1                             | 4.31        |
| SLC7A11       | solute carrier family 7 member 11                     | 4.18        |
| CDC20         | cell division cycle 20                                | 4.13        |
| DEPDC1        | DEP domain containing 1                               | 4.03        |
| CA12          | carbonic anhydrase 12                                 | 4.01        |
| NEK2          | NIMA related kinase 2                                 | 3.89        |
| RP11_770J15   |                                                       | 3.88        |
| CENPF         | centromere protein F                                  | 3.85        |
| SLC22A11      | solute carrier family 22 member 11                    | 3.79        |
| COL24A1       | collagen type XXIV alpha 1 chain                      | 3.78        |
| GABRD         | gamma-aminobutyric acid type A receptor subunit delta | 3.76        |
| MUC13         | mucin 13, cell surface associated                     | 3.76        |
| TTK           | TTK protein kinase                                    | 3.71        |
| KIF20A        | kinesin family member 20A                             | 3.7         |
| TRIM16L       | tripartite motif containing 16 like                   | 3.68        |
| B4GALNT1      | beta-1,4-N-acetyl-galactosaminyltransferase 1         | 3.66        |
| HJURP         | Holliday junction recognition protein                 | 3.63        |
| FBXW10        | F-box and WD repeat domain containing 10              | 3.61        |
| MMP11         | matrix metalloproteinase 11                           | 3.6         |
| CABYR         | calcium binding tyrosine phosphorylation regulated    | 3.57        |
| ANLN          | anillin actin binding protein                         | 3.56        |
| TRIM16        | tripartite motif containing 16                        | 3.55        |
| GPC3          | glypican 3                                            | 3.52        |
| THBS4         | thrombospondin 4                                      | 3.52        |
| DLGAP5        | DLG associated protein 5                              | 3.48        |
| HMMR          | hyaluronan mediated motility receptor                 | 3.45        |
| CEP55         | centrosomal protein 55                                | 3.44        |
| LYPD1         | LY6/PLAUR domain containing 1                         | 3.43        |
| BUB1B         | BUB1 mitotic checkpoint serine/threonine kinase B     | 3.42        |
| RP11_284F2110 |                                                       | 3.42        |
| RP11_284F217  |                                                       | 3.42        |
| KIF18B        | kinesin family member 18B                             | 3.39        |
| KIF4A         | kinesin family member 4A                              | 3.37        |
| TOP2A         | DNA topoisomerase II alpha                            | 3.34        |
| KIF2C         | kinesin family member 2C                              | 3.33        |
| RAB3B         | RAB3B, member RAS oncogene family                     | 3.28        |
| CCNO          | cyclin O                                              | 3.25        |
| DUXAP9        | double homeobox A pseudogene 9                        | 3.23        |
| MYBL2         | MYB proto-oncogene like 2                             | 3.23        |
| BIRC5         | baculoviral IAP repeat containing 5                   | 3.22        |
| NDC80         | NDC80 kinetochore complex component                   | 3.21        |
| CDKN2A        | cyclin dependent kinase inhibitor 2A                  | 3.19        |
| TTC39A        | tetratricopeptide repeat domain 39A                   | 3.17        |

|              |                                                            |      |
|--------------|------------------------------------------------------------|------|
| RBM24        | RNA binding motif protein 24                               | 3.14 |
| TROAP        | trophinin associated protein                               | 3.14 |
| BUB1         | BUB1 mitotic checkpoint serine/threonine kinase            | 3.13 |
| PBK          | PDZ binding kinase                                         | 3.13 |
| VASH2        | vasohibin 2                                                | 3.13 |
| DUXAP10      | double homeobox A pseudogene 10                            | 3.12 |
| NCAPG        | non-SMC condensin I complex subunit G                      | 3.11 |
| RP11_284F219 |                                                            | 3.11 |
| CDCA5        | cell division cycle associated 5                           | 3.1  |
| MELK         | maternal embryonic leucine zipper kinase                   | 3.1  |
| KIFC1        | kinesin family member C1                                   | 3.09 |
| TREM2        | triggering receptor expressed on myeloid cells 2           | 3.08 |
| DUXAP8       | double homeobox A pseudogene 8                             | 3.06 |
| EXO1         | exonuclease 1                                              | 3.05 |
| CDCA8        | cell division cycle associated 8                           | 3.04 |
| PTTG1        | PTTG1 regulator of sister chromatid separation, securin    | 3.02 |
| SSUH2        | ssu-2 homolog                                              | 3.02 |
| ARFGEF3      | ARFGEF family member 3                                     | 3    |
| MKI67        | marker of proliferation Ki-67                              | 3    |
| CCNB1        | cyclin B1                                                  | 2.98 |
| APLN         | apelin                                                     | 2.94 |
| E2F8         | E2F transcription factor 8                                 | 2.93 |
| UGT2B11      | UDP glucuronosyltransferase family 2 member B11            | 2.93 |
| ESM1         | endothelial cell specific molecule 1                       | 2.91 |
| CKAP2L       | cytoskeleton associated protein 2 like                     | 2.9  |
| ASPM         | assembly factor for spindle microtubules                   | 2.89 |
| CDK1         | cyclin dependent kinase 1                                  | 2.88 |
| OLFML2B      | olfactomedin like 2B                                       | 2.88 |
| RAD54L       | RAD54 like                                                 | 2.87 |
| GTSE1        | G2 and S-phase expressed 1                                 | 2.86 |
| ILDR2        | immunoglobulin like domain containing receptor 2           | 2.86 |
| MSL3P1       | MSL complex subunit 3 pseudogene 1                         | 2.85 |
| RP11-73M18.2 |                                                            | 2.85 |
| ZIC4         | Zic family member 4                                        | 2.82 |
| DIAPH3       | diaphanous related formin 3                                | 2.81 |
| KIF15        | kinesin family member 15                                   | 2.79 |
| FOXM1        | forkhead box M1                                            | 2.78 |
| KIF23        | kinesin family member 23                                   | 2.78 |
| CCL20        | C-C motif chemokine ligand 20                              | 2.77 |
| E2F7         | E2F transcription factor 7                                 | 2.77 |
| CBX2         | chromobox 2                                                | 2.75 |
| MAPT         | microtubule associated protein tau                         | 2.75 |
| CCNB2        | cyclin B2                                                  | 2.74 |
| ROBO1        | roundabout guidance receptor 1                             | 2.74 |
| TRIP13       | thyroid hormone receptor interactor 13                     | 2.74 |
| MDK          | midkine                                                    | 2.73 |
| HRCT1        | histidine rich carboxyl terminus 1                         | 2.72 |
| LPL          | lipoprotein lipase                                         | 2.72 |
| CD109        | CD109 molecule                                             | 2.69 |
| KCNJ5        | potassium inwardly rectifying channel subfamily J member 5 | 2.69 |
| MSC          | musculin                                                   | 2.69 |
| EPHB2        | EPH receptor B2                                            | 2.68 |
| POLQ         | DNA polymerase theta                                       | 2.68 |
| AURKB        | aurora kinase B                                            | 2.67 |
| CCNA2        | cyclin A2                                                  | 2.67 |
| CRYBG2       | crystallin beta-gamma domain containing 2                  | 2.67 |
| GPX2         | glutathione peroxidase 2                                   | 2.66 |



|                  |                                                             |      |
|------------------|-------------------------------------------------------------|------|
| STC2             | stanniocalcin 2                                             | 2.66 |
| UBD              | ubiquitin D                                                 | 2.65 |
| IGSF3            | immunoglobulin superfamily member 3                         | 2.64 |
| GNAZ             | G protein subunit alpha z                                   | 2.63 |
| DNAJC6           | DnaJ heat shock protein family (Hsp40) member C6            | 2.62 |
| PRC1             | protein regulator of cytokinesis 1                          | 2.62 |
| TEDC2            | tubulin epsilon and delta complex 2                         | 2.59 |
| CAP2             | cyclase associated actin cytoskeleton regulatory protein 2  | 2.58 |
| CENPE            | centromere protein E                                        | 2.57 |
| G6PD             | glucose-6-phosphate dehydrogenase                           | 2.57 |
| MYO1A            | myosin IA                                                   | 2.57 |
| IQGAP3           | IQ motif containing GTPase activating protein 3             | 2.55 |
| CCDC170          | coiled-coil domain containing 170                           | 2.52 |
| KIF14            | kinesin family member 14                                    | 2.52 |
| UBE2T            | ubiquitin conjugating enzyme E2 T                           | 2.52 |
| CDT1             | chromatin licensing and DNA replication factor 1            | 2.5  |
| MACIR            | macrophage immunometabolism regulator                       | 2.49 |
| MPZ              | myelin protein zero                                         | 2.49 |
| SP5              | Sp5 transcription factor                                    | 2.49 |
| TRAIP            | TRAF interacting protein                                    | 2.48 |
| MAPK8IP2         | mitogen-activated protein kinase 8 interacting protein 2    | 2.47 |
| NEB              | nebulin                                                     | 2.47 |
| XXbac-BPG32J3.22 |                                                             | 2.47 |
| AKR1C3           | aldo-keto reductase family 1 member C3                      | 2.46 |
| C12orf75         | chromosome 12 open reading frame 75                         | 2.45 |
| ECT2             | epithelial cell transforming 2                              | 2.45 |
| FHAD1            | forkhead associated phosphopeptide binding domain 1         | 2.44 |
| EME1             | essential meiotic structure-specific endonuclease 1         | 2.43 |
| FAM72B           | family with sequence similarity 72 member B                 | 2.4  |
| H2AC18/H2AC19    | H2A clustered histone 18                                    | 2.4  |
| NDUFA4L2         | NDUFA4 mitochondrial complex associated like 2              | 2.4  |
| SHCBP1           | SHC binding and spindle associated 1                        | 2.4  |
| NCAPH            | non-SMC condensin I complex subunit H                       | 2.37 |
| COL15A1          | collagen type XV alpha 1 chain                              | 2.36 |
| TKT              | transketolase                                               | 2.36 |
| ASIC1            | acid sensing ion channel subunit 1                          | 2.35 |
| CEMIP            | cell migration inducing hyaluronidase 1                     | 2.35 |
| DEPDC1B          | DEP domain containing 1B                                    | 2.35 |
| GIMAP1-GIMAP5    | GIMAP1-GIMAP5 readthrough                                   | 2.35 |
| TMEM132A         | transmembrane protein 132A                                  | 2.35 |
| TP53I3           | tumor protein p53 inducible protein 3                       | 2.35 |
| GPRIN1           | G protein regulated inducer of neurite outgrowth 1          | 2.34 |
| LEF1             | lymphoid enhancer binding factor 1                          | 2.32 |
| SERTAD4          | SERTA domain containing 4                                   | 2.32 |
| CRIP3            | cysteine rich protein 3                                     | 2.31 |
| PKMYT1           | protein kinase, membrane associated tyrosine/threonine 1    | 2.31 |
| FAM83D           | family with sequence similarity 83 member D                 | 2.29 |
| TICRR            | TOPBP1 interacting checkpoint and replication regulator     | 2.29 |
| TXNRD1           | thioredoxin reductase 1                                     | 2.28 |
| CENPI            | centromere protein I                                        | 2.25 |
| ZIC1             | Zic family member 1                                         | 2.25 |
| EDIL3            | EGF like repeats and discoidin domains 3                    | 2.24 |
| GBAP1            | glucosylceramidase beta pseudogene 1                        | 2.24 |
| SLC26A6          | solute carrier family 26 member 6                           | 2.23 |
| ACSL4            | acyl-CoA synthetase long chain family member 4              | 2.22 |
| OR211P           | olfactory receptor family 2 subfamily I member 1 pseudogene | 2.22 |
| PLK1             | polo like kinase 1                                          | 2.22 |

|            |                                                                  |      |
|------------|------------------------------------------------------------------|------|
| UGT1A6     | UDP glucuronosyltransferase family 1 member A6                   | 2.19 |
| CDC45      | cell division cycle 45                                           | 2.18 |
| DTL        | denticleless E3 ubiquitin protein ligase homolog                 | 2.18 |
| E2F1       | E2F transcription factor 1                                       | 2.18 |
| RACGAP1    | Rac GTPase activating protein 1                                  | 2.18 |
| RECQL4     | RecQ like helicase 4                                             | 2.18 |
| HES6       | hes family bHLH transcription factor 6                           | 2.17 |
| ORC1       | origin recognition complex subunit 1                             | 2.17 |
| OSR1       | odd-skipped related transcription factor 1                       | 2.17 |
| CELSR3     | cadherin EGF LAG seven-pass G-type receptor 3                    | 2.16 |
| PARPBP     | PARP1 binding protein                                            | 2.16 |
| TRIM45     | tripartite motif containing 45                                   | 2.16 |
| MCM10      | minichromosome maintenance 10 replication initiation factor      | 2.15 |
| RRM2       | ribonucleotide reductase regulatory subunit M2                   | 2.15 |
| ESCO2      | establishment of sister chromatid cohesion N-acetyltransferase 2 | 2.14 |
| RP1_140K85 |                                                                  | 2.14 |
| TMEM150B   | transmembrane protein 150B                                       | 2.14 |
| CAPG       | capping actin protein, gelsolin like                             | 2.13 |
| SRXN1      | sulfiredoxin 1                                                   | 2.13 |
| CDCA3      | cell division cycle associated 3                                 | 2.12 |
| E2F2       | E2F transcription factor 2                                       | 2.12 |
| H2BC18     | H2B clustered histone 18                                         | 2.12 |
| PHLDA2     | pleckstrin homology like domain family A member 2                | 2.11 |
| SLC52A3    | solute carrier family 52 member 3                                | 2.11 |
| ADAMTS14   | ADAM metalloproteinase with thrombospondin type 1 motif 14       | 2.1  |
| PRKAA2     | protein kinase AMP-activated catalytic subunit alpha 2           | 2.1  |
| ARHGAP11A  | Rho GTPase activating protein 11A                                | 2.09 |
| GXYLT2     | glucoside xylosyltransferase 2                                   | 2.09 |
| ZSWIM5     | zinc finger SWIM-type containing 5                               | 2.08 |
| KIF11      | kinesin family member 11                                         | 2.07 |
| TK1        | thymidine kinase 1                                               | 2.07 |
| MEX3A      | mex-3 RNA binding family member A                                | 2.06 |
| NUSAP1     | nucleolar and spindle associated protein 1                       | 2.06 |
| SNHG4      | small nucleolar RNA host gene 4                                  | 2.06 |
| THY1       | Thy-1 cell surface antigen                                       | 2.06 |
| TMEM265    | transmembrane protein 265                                        | 2.06 |
| BCAT1      | branched chain amino acid transaminase 1                         | 2.05 |
| GINS1      | GINS complex subunit 1                                           | 2.05 |
| H4C14      | H4 clustered histone 14                                          | 2.05 |
| HSPB1      | heat shock protein family B (small) member 1                     | 2.05 |
| MAP2       | microtubule associated protein 2                                 | 2.05 |
| RAD51      | RAD51 recombinase                                                | 2.05 |
| SLC45A2    | solute carrier family 45 member 2                                | 2.05 |
| TONSL      | tonsoku like, DNA repair protein                                 | 2.05 |
| ARHGEF39   | Rho guanine nucleotide exchange factor 39                        | 2.04 |
| CLSPN      | claspin                                                          | 2.03 |
| COLCA2     | colorectal cancer associated 2                                   | 2.03 |
| PCLAF      | PCNA clamp associated factor                                     | 2.03 |
| STRIP2     | striatin interacting protein 2                                   | 2.03 |
| H4C15      | H4 clustered histone 15                                          | 2.02 |
| TPX2       | TPX2 microtubule nucleation factor                               | 2.02 |
| DPYSL4     | dihydropyrimidinase like 4                                       | 2.01 |
| EFNA4      | ephrin A4                                                        | 2.01 |
| FAM78B     | family with sequence similarity 78 member B                      | 1.99 |
| CDC6       | cell division cycle 6                                            | 1.98 |
| FIGNL2     | fidgetin like 2                                                  | 1.98 |
| TTC9       | tetratricopeptide repeat domain 9                                | 1.98 |

|               |                                                        |      |
|---------------|--------------------------------------------------------|------|
| XRCC2         | X-ray repair cross complementing 2                     | 1.98 |
| ASF1B         | anti-silencing function 1B histone chaperone           | 1.97 |
| CCNF          | cyclin F                                               | 1.97 |
| FERMT1        | fermitin family member 1                               | 1.97 |
| SFRP4         | secreted frizzled related protein 4                    | 1.97 |
| CCDC34        | coiled-coil domain containing 34                       | 1.96 |
| CDKN2C        | cyclin dependent kinase inhibitor 2C                   | 1.96 |
| FABP5         | fatty acid binding protein 5                           | 1.96 |
| ITGA2         | integrin subunit alpha 2                               | 1.96 |
| LINC01138     | long intergenic non-protein coding RNA 1138            | 1.96 |
| GAREM2        | GRB2 associated regulator of MAPK1 subtype 2           | 1.94 |
| H4C8          | H4 clustered histone 8                                 | 1.94 |
| C21orf58      | chromosome 21 open reading frame 58                    | 1.93 |
| EML6          | EMAP like 6                                            | 1.93 |
| NT5DC2        | 5'-nucleotidase domain containing 2                    | 1.93 |
| TMCC1-AS1     | TMCC1 antisense RNA 1 (head to head)                   | 1.93 |
| THY1-AS1      |                                                        | 1.91 |
| UHRF1         | ubiquitin like with PHD and ring finger domains 1      | 1.91 |
| OTUB2         | OTU deubiquitinase, ubiquitin aldehyde binding 2       | 1.9  |
| FAM72A        | family with sequence similarity 72 member A            | 1.89 |
| TUBB3         | tubulin beta 3 class III                               | 1.89 |
| PIF1          | PIF1 5'-to-3' DNA helicase                             | 1.88 |
| SGO2          | shugoshin 2                                            | 1.88 |
| ADM2          | adrenomedullin 2                                       | 1.87 |
| CTC_351M121   |                                                        | 1.87 |
| NOS2          | nitric oxide synthase 2                                | 1.87 |
| AKR1C1/AKR1C2 | aldo-keto reductase family 1 member C2                 | 1.86 |
| ASRGL1        | asparaginase and isoaspartyl peptidase 1               | 1.86 |
| GJC1          | gap junction protein gamma 1                           | 1.86 |
| PRKAR2A-AS1   | PRKAR2A antisense RNA 1                                | 1.86 |
| C1QTNF3       | C1q and TNF related 3                                  | 1.85 |
| PIR           | pirin                                                  | 1.85 |
| SQSTM1        | sequestosome 1                                         | 1.85 |
| FAM111B       | family with sequence similarity 111 member B           | 1.83 |
| MAD2L1        | mitotic arrest deficient 2 like 1                      | 1.83 |
| ZWINT         | ZW10 interacting kinetochore protein                   | 1.83 |
| RP11_50171    |                                                        | 1.81 |
| SNCG          | synuclein gamma                                        | 1.81 |
| SNORD3A       | small nucleolar RNA, C/D box 3A                        | 1.81 |
| ANKRD13B      | ankyrin repeat domain 13B                              | 1.8  |
| LOC101927136  | uncharacterized LOC101927136                           | 1.8  |
| RASD2         | RASD family member 2                                   | 1.8  |
| SLC6A9        | solute carrier family 6 member 9                       | 1.8  |
| STEAP2        | STEAP2 metalloreductase                                | 1.8  |
| GBA           | glucosylceramidase beta                                | 1.78 |
| HMGA1         | high mobility group AT-hook 1                          | 1.78 |
| PRR11         | proline rich 11                                        | 1.78 |
| CENPK         | centromere protein K                                   | 1.77 |
| FSD1L         | fibronectin type III and SPRY domain containing 1 like | 1.77 |
| RGS17         | regulator of G protein signaling 17                    | 1.77 |
| RP11_173P153  |                                                        | 1.77 |
| SPON2         | spondin 2                                              | 1.76 |
| STIL          | STIL centriolar assembly protein                       | 1.76 |
| AC068831.7    |                                                        | 1.75 |
| CCNE1         | cyclin E1                                              | 1.75 |
| FGF13         | fibroblast growth factor 13                            | 1.75 |
| LOC105370941  | uncharacterized LOC105370941                           | 1.75 |

|                |                                                                  |      |
|----------------|------------------------------------------------------------------|------|
| MPP3           | membrane palmitoylated protein 3                                 | 1.75 |
| STMN1          | stathmin 1                                                       | 1.75 |
| TMEM45B        | transmembrane protein 45B                                        | 1.75 |
| RAD51AP1       | RAD51 associated protein 1                                       | 1.74 |
| C2CD4D-AS1     | C2CD4D and THEM5 antisense RNA 1                                 | 1.73 |
| CDKN2B         | cyclin dependent kinase inhibitor 2B                             | 1.73 |
| CIP2A          | cellular inhibitor of PP2A                                       | 1.73 |
| CSMD2          | CUB and Sushi multiple domains 2                                 | 1.73 |
| MSANTD3-TMEFF1 | MSANTD3-TMEFF1 readthrough                                       | 1.73 |
| DUOX1          | dual oxidase 1                                                   | 1.72 |
| FOXD2-AS1      | FOXD2 adjacent opposite strand RNA 1                             | 1.72 |
| SOWAHCP2       | SOWAHC pseudogene 2                                              | 1.72 |
| GOLGA2P7       | GOLGA2 pseudogene 7                                              | 1.71 |
| MTBP           | MDM2 binding protein                                             | 1.71 |
| MTHFD1L        | methylenetetrahydrofolate dehydrogenase (NADP+ dependent) 1 like | 1.71 |
| S100A10        | S100 calcium binding protein A10                                 | 1.71 |
| CENPL          | centromere protein L                                             | 1.7  |
| CGREF1         | cell growth regulator with EF-hand domain 1                      | 1.7  |
| FAM189B        | family with sequence similarity 189 member B                     | 1.7  |
| H2BC20P        | H2B clustered histone 20, pseudogene                             | 1.7  |
| DSCC1          | DNA replication and sister chromatid cohesion 1                  | 1.69 |
| TMC7           | transmembrane channel like 7                                     | 1.69 |
| TMEM106C       | transmembrane protein 106C                                       | 1.69 |
| TMEM54         | transmembrane protein 54                                         | 1.69 |
| FLVCR1-DT      | FLVCR1 divergent transcript                                      | 1.68 |
| GOLM1          | golgi membrane protein 1                                         | 1.68 |
| ITGA6          | integrin subunit alpha 6                                         | 1.68 |
| NUDT1          | nudix hydrolase 1                                                | 1.68 |
| RP11-704M14.1  |                                                                  | 1.68 |
| ARHGAP22       | Rho GTPase activating protein 22                                 | 1.67 |
| APOBEC3B       | apolipoprotein B mRNA editing enzyme catalytic subunit 3B        | 1.66 |
| ARHGAP39       | Rho GTPase activating protein 39                                 | 1.66 |
| RASL12         | RAS like family 12                                               | 1.66 |
| RRAGD          | Ras related GTP binding D                                        | 1.66 |
| BICDL1         | BICD family like cargo adaptor 1                                 | 1.65 |
| CD34           | CD34 molecule                                                    | 1.65 |
| HDAC11         | histone deacetylase 11                                           | 1.65 |
| SPSB2          | spiA/ryanodine receptor domain and SOCS box containing 2         | 1.65 |
| C1orf112       | chromosome 1 open reading frame 112                              | 1.64 |
| CEP131         | centrosomal protein 131                                          | 1.64 |
| LOC100288637   | OTU deubiquitinase 7A pseudogene                                 | 1.64 |
| WDR62          | WD repeat domain 62                                              | 1.64 |
| CES1P1         | carboxylesterase 1 pseudogene 1                                  | 1.63 |
| RTKN2          | rhotekin 2                                                       | 1.63 |
| TMEM74B        | transmembrane protein 74B                                        | 1.63 |
| TNFRSF4        | TNF receptor superfamily member 4                                | 1.63 |
| CTD_2649C142   |                                                                  | 1.62 |
| FOXD2          | forkhead box D2                                                  | 1.62 |
| LINC00653      | long intergenic non-protein coding RNA 653                       | 1.62 |
| PVT1           | Pvt1 oncogene                                                    | 1.62 |
| RHPN1          | rhopilin Rho GTPase binding protein 1                            | 1.62 |
| EZH2           | enhancer of zeste 2 polycomb repressive complex 2 subunit        | 1.61 |
| PLVAP          | plasmalemma vesicle associated protein                           | 1.61 |
| RAD54B         | RAD54 homolog B                                                  | 1.61 |
| RP11_20I204    |                                                                  | 1.61 |
| UBE2S          | ubiquitin conjugating enzyme E2 S                                | 1.61 |
| ZBTB12         | zinc finger and BTB domain containing 12                         | 1.61 |

|              |                                                                   |      |
|--------------|-------------------------------------------------------------------|------|
| AURKA        | aurora kinase A                                                   | 1.6  |
| FBXO32       | F-box protein 32                                                  | 1.6  |
| PMFBP1       | polyamine modulated factor 1 binding protein 1                    | 1.6  |
| KCNJ4        | potassium inwardly rectifying channel subfamily J member 4        | 1.59 |
| PFKFB4       | 6-phosphofructo-2-kinase/fructose-2,6-biphosphatase 4             | 1.59 |
| TLL7         | tubulin tyrosine ligase like 7                                    | 1.59 |
| CAVIN3       | caveolae associated protein 3                                     | 1.58 |
| RFC4         | replication factor C subunit 4                                    | 1.58 |
| ANXA2        | annexin A2                                                        | 1.57 |
| ME1          | malic enzyme 1                                                    | 1.57 |
| AC0921714    |                                                                   | 1.56 |
| FANCI        | FA complementation group I                                        | 1.56 |
| OSBP2        | oxysterol binding protein 2                                       | 1.56 |
| PAFAH1B3     | platelet activating factor acetylhydrolase 1b catalytic subunit 3 | 1.56 |
| SPDL1        | spindle apparatus coiled-coil protein 1                           | 1.56 |
| ASPH         | aspartate beta-hydroxylase                                        | 1.55 |
| RNF157       | ring finger protein 157                                           | 1.55 |
| TCF19        | transcription factor 19                                           | 1.55 |
| BOP1         | BOP1 ribosomal biogenesis factor                                  | 1.54 |
| CCDC112      | coiled-coil domain containing 112                                 | 1.54 |
| DDIAS        | DNA damage induced apoptosis suppressor                           | 1.54 |
| NSMCE2       | NSE2 (MMS21) homolog, SMC5-SMC6 complex SUMO ligase               | 1.54 |
| RNF43        | ring finger protein 43                                            | 1.54 |
| C9orf16      | chromosome 9 open reading frame 16                                | 1.53 |
| CTC_471F35   |                                                                   | 1.53 |
| DCAF4L1      | DDB1 and CUL4 associated factor 4 like 1                          | 1.53 |
| EHMT2        | euchromatic histone lysine methyltransferase 2                    | 1.53 |
| PANX2        | pannexin 2                                                        | 1.53 |
| PCSK5        | proprotein convertase subtilisin/kexin type 5                     | 1.53 |
| AC068946.2   |                                                                   | 1.52 |
| C11orf45     | chromosome 11 open reading frame 45                               | 1.52 |
| DTNA         | dystrobrevin alpha                                                | 1.52 |
| LOC101926967 | uncharacterized LOC101926967                                      | 1.52 |
| OLFML2A      | olfactomedin like 2A                                              | 1.52 |
| STX1A        | syntaxin 1A                                                       | 1.52 |
| VNN2         | vanin 2                                                           | 1.52 |
| ZNF681       | zinc finger protein 681                                           | 1.52 |
| ANO10        | anoctamin 10                                                      | 1.51 |
| RAC3         | Rac family small GTPase 3                                         | 1.51 |
| RP3_340N12   |                                                                   | 1.51 |
| BRCA1        | BRCA1 DNA repair associated                                       | 1.5  |
| ANXA2P2      | annexin A2 pseudogene 2                                           | 1.49 |
| CHN1         | chimerin 1                                                        | 1.49 |
| CHRD2        | chordin like 2                                                    | 1.49 |
| CTSA         | cathepsin A                                                       | 1.49 |
| GLMP         | glycosylated lysosomal membrane protein                           | 1.49 |
| HTATIP2      | HIV-1 Tat interactive protein 2                                   | 1.49 |
| PYGB         | glycogen phosphorylase B                                          | 1.49 |
| RNASEH2A     | ribonuclease H2 subunit A                                         | 1.49 |
| RP5_1074L14  |                                                                   | 1.49 |
| ASB16        | ankyrin repeat and SOCS box containing 16                         | 1.48 |
| ENAH         | ENAH actin regulator                                              | 1.48 |
| H2BC15       | H2B clustered histone 15                                          | 1.48 |
| KRT8P12      | keratin 8 pseudogene 12                                           | 1.48 |
| MAPK12       | mitogen-activated protein kinase 12                               | 1.48 |
| ORC6         | origin recognition complex subunit 6                              | 1.48 |
| PACC1        | proton activated chloride channel 1                               | 1.48 |

|               |                                                  |      |
|---------------|--------------------------------------------------|------|
| SAC3D1        | SAC3 domain containing 1                         | 1.48 |
| STXBP6        | syntaxin binding protein 6                       | 1.48 |
| TMEM81        | transmembrane protein 81                         | 1.48 |
| ABLIM2        | actin binding LIM protein family member 2        | 1.47 |
| HROB          | homologous recombination factor with OB-fold     | 1.47 |
| TRIM59        | tripartite motif containing 59                   | 1.47 |
| CENPX         | centromere protein X                             | 1.46 |
| PLK4          | polo like kinase 4                               | 1.46 |
| PLXDC1        | plexin domain containing 1                       | 1.46 |
| EID3          | EP300 interacting inhibitor of differentiation 3 | 1.45 |
| LIMK1         | LIM domain kinase 1                              | 1.45 |
| KIF24         | kinesin family member 24                         | 1.44 |
| TRIM6         | tripartite motif containing 6                    | 1.44 |
| TXN           | thioredoxin                                      | 1.44 |
| ZBED8         | zinc finger BED-type containing 8                | 1.44 |
| ZNF775        | zinc finger protein 775                          | 1.44 |
| CDH13         | cadherin 13                                      | 1.43 |
| FBF1          | Fas binding factor 1                             | 1.43 |
| OXLD1         | oxidoreductase like domain containing 1          | 1.43 |
| PKM           | pyruvate kinase M1/2                             | 1.43 |
| PSORS1C1      | psoriasis susceptibility 1 candidate 1           | 1.43 |
| TBC1D31       | TBC1 domain family member 31                     | 1.43 |
| LOC105369760  |                                                  | 1.42 |
| MSC-AS1       | MSC antisense RNA 1                              | 1.42 |
| PSRC1         | proline and serine rich coiled-coil 1            | 1.42 |
| S100A11       | S100 calcium binding protein A11                 | 1.42 |
| SQLE          | squalene epoxidase                               | 1.42 |
| WDR76         | WD repeat domain 76                              | 1.42 |
| CCDC110       | coiled-coil domain containing 110                | 1.41 |
| MSTO2P        | misato family member 2, pseudogene               | 1.41 |
| RGS5          | regulator of G protein signaling 5               | 1.41 |
| EMC3-AS1      | EMC3 antisense RNA 1                             | 1.4  |
| NOTCH3        | notch receptor 3                                 | 1.4  |
| PLAG1         | PLAG1 zinc finger                                | 1.4  |
| RP1_267D116   |                                                  | 1.4  |
| STEAP1        | STEAP family member 1                            | 1.4  |
| CCDC24        | coiled-coil domain containing 24                 | 1.39 |
| DLG5          | discs large MAGUK scaffold protein 5             | 1.38 |
| DNMT3B        | DNA methyltransferase 3 beta                     | 1.38 |
| EBF1          | EBF transcription factor 1                       | 1.38 |
| LINC01011     | long intergenic non-protein coding RNA 1011      | 1.38 |
| N4BP3         | NEDD4 binding protein 3                          | 1.38 |
| NME1          | NME/NM23 nucleoside diphosphate kinase 1         | 1.38 |
| RNASE1        | ribonuclease A family member 1, pancreatic       | 1.38 |
| SERPINI1      | serpin family I member 1                         | 1.38 |
| SLC38A6       | solute carrier family 38 member 6                | 1.38 |
| SLC52A2       | solute carrier family 52 member 2                | 1.38 |
| TRIM36        | tripartite motif containing 36                   | 1.38 |
| C1QTNF3-AMACR | C1QTNF3-AMACR readthrough (NMD candidate)        | 1.36 |
| P4HA2         | prolyl 4-hydroxylase subunit alpha 2             | 1.36 |
| RP11_1109F113 |                                                  | 1.36 |
| SCNM1         | sodium channel modifier 1                        | 1.36 |
| ZNF572        | zinc finger protein 572                          | 1.36 |
| AC073111.5    |                                                  | 1.35 |
| CCNE2         | cyclin E2                                        | 1.35 |
| CDH24         | cadherin 24                                      | 1.35 |
| CENPU         | centromere protein U                             | 1.35 |

|              |                                                                     |      |
|--------------|---------------------------------------------------------------------|------|
| GLI4         | GLI family zinc finger 4                                            | 1.35 |
| INCENP       | inner centromere protein                                            | 1.35 |
| MCMDC2       | minichromosome maintenance domain containing 2                      | 1.35 |
| MSTO1        | misato mitochondrial distribution and morphology regulator 1        | 1.35 |
| NECAB3       | N-terminal EF-hand calcium binding protein 3                        | 1.35 |
| TDRKH        | tudor and KH domain containing                                      | 1.35 |
| VSIG10L      | V-set and immunoglobulin domain containing 10 like                  | 1.35 |
| CENPH        | centromere protein H                                                | 1.34 |
| FANCD2       | FA complementation group D2                                         | 1.34 |
| HASPIN       | histone H3 associated protein kinase                                | 1.34 |
| NR2C2AP      | nuclear receptor 2C2 associated protein                             | 1.34 |
| PAQR4        | progesterin and adipoQ receptor family member 4                     | 1.34 |
| ST20-MTHFS   | ST20-MTHFS readthrough                                              | 1.34 |
| TALDO1       | transaldolase 1                                                     | 1.34 |
| TLCD1        | TLC domain containing 1                                             | 1.34 |
| UCK2         | uridine-cytidine kinase 2                                           | 1.34 |
| BOLA2/BOLA2B | bolA family member 2                                                | 1.33 |
| COA6         | cytochrome c oxidase assembly factor 6                              | 1.33 |
| EPDR1        | ependymin related 1                                                 | 1.33 |
| HGH1         | HGH1 homolog                                                        | 1.33 |
| MTMR11       | myotubularin related protein 11                                     | 1.33 |
| TLL1         | tubulin tyrosine ligase like 1                                      | 1.33 |
| ZBTB41       | zinc finger and BTB domain containing 41                            | 1.33 |
| ALPK3        | alpha kinase 3                                                      | 1.32 |
| CHEK1        | checkpoint kinase 1                                                 | 1.32 |
| FEN1         | flap structure-specific endonuclease 1                              | 1.32 |
| KIFC2        | kinesin family member C2                                            | 1.32 |
| PTP4A3       | protein tyrosine phosphatase 4A3                                    | 1.32 |
| RP1_80N23    |                                                                     | 1.32 |
| CCN3         | cellular communication network factor 3                             | 1.31 |
| CDC7         | cell division cycle 7                                               | 1.31 |
| LINC00528    | long intergenic non-protein coding RNA 528                          | 1.31 |
| MCM8         | minichromosome maintenance 8 homologous recombination repair factor | 1.31 |
| RP3_406P245  |                                                                     | 1.31 |
| SMYD3        | SET and MYND domain containing 3                                    | 1.31 |
| ALDOA        | aldolase, fructose-bisphosphate A                                   | 1.3  |
| ASAP3        | ArfGAP with SH3 domain, ankyrin repeat and PH domain 3              | 1.3  |
| CSPG4        | chondroitin sulfate proteoglycan 4                                  | 1.3  |
| CTA_445C914  |                                                                     | 1.3  |
| CTSC         | cathepsin C                                                         | 1.3  |
| GGH          | gamma-glutamyl hydrolase                                            | 1.3  |
| HNF1A-AS1    | HNF1A antisense RNA 1                                               | 1.3  |
| PABPC4L      | poly(A) binding protein cytoplasmic 4 like                          | 1.3  |
| RP11_600F247 |                                                                     | 1.3  |
| ZNF436-AS1   | ZNF436 antisense RNA 1                                              | 1.3  |
| AC0093032    |                                                                     | 1.29 |
| DPY19L1P1    | DPY19L1 pseudogene 1                                                | 1.29 |
| FLVCR1       | FLVCR heme transporter 1                                            | 1.29 |
| KPNA2        | karyopherin subunit alpha 2                                         | 1.29 |
| PP7080       | uncharacterized LOC25845                                            | 1.29 |
| ZC2HC1A      | zinc finger C2HC-type containing 1A                                 | 1.29 |
| CKAP2        | cytoskeleton associated protein 2                                   | 1.28 |
| COL5A3       | collagen type V alpha 3 chain                                       | 1.28 |
| CTD_2287O165 |                                                                     | 1.28 |
| DNM3         | dynamamin 3                                                         | 1.28 |
| DSTNP2       | DSTN pseudogene 2                                                   | 1.28 |
| LINC02542    | long intergenic non-protein coding RNA 2542                         | 1.28 |

|             |                                                           |      |
|-------------|-----------------------------------------------------------|------|
| MCM2        | minichromosome maintenance complex component 2            | 1.28 |
| PSMG3       | proteasome assembly chaperone 3                           | 1.28 |
| SCAMP3      | secretory carrier membrane protein 3                      | 1.28 |
| TAF6        | TATA-box binding protein associated factor 6              | 1.28 |
| ZFP41       | ZFP41 zinc finger protein                                 | 1.28 |
| GRAMD1A     | GRAM domain containing 1A                                 | 1.27 |
| JPT1        | Jupiter microtubule associated homolog 1                  | 1.27 |
| LIN9        | lin-9 DREAM MuvB core complex component                   | 1.27 |
| TUBG1       | tubulin gamma 1                                           | 1.27 |
| ABHD4       | abhydrolase domain containing 4, N-acyl phospholipase B   | 1.26 |
| BAG2        | BAG cochaperone 2                                         | 1.26 |
| CCDC77      | coiled-coil domain containing 77                          | 1.26 |
| CENPQ       | centromere protein Q                                      | 1.26 |
| CLCN7       | chloride voltage-gated channel 7                          | 1.26 |
| GOLGA2P10   | GOLGA2 pseudogene 10                                      | 1.26 |
| LRP12       | LDL receptor related protein 12                           | 1.26 |
| OSBPL3      | oxysterol binding protein like 3                          | 1.26 |
| PLEKHA8P1   | pleckstrin homology domain containing A8 pseudogene 1     | 1.26 |
| PYCR3       | pyrroline-5-carboxylate reductase 3                       | 1.26 |
| RELL2       | RELT like 2                                               | 1.26 |
| RFXANK      | regulatory factor X associated ankyrin containing protein | 1.26 |
| RHNO1       | RAD9-HUS1-RAD1 interacting nuclear orphan 1               | 1.26 |
| RNF187      | ring finger protein 187                                   | 1.26 |
| SPATS2      | spermatogenesis associated serine rich 2                  | 1.26 |
| AGTRAP      | angiotensin II receptor associated protein                | 1.25 |
| AP5Z1       | adaptor related protein complex 5 subunit zeta 1          | 1.25 |
| C7orf25     | chromosome 7 open reading frame 25                        | 1.25 |
| H2BC12      | H2B clustered histone 12                                  | 1.25 |
| HOMER3      | homer scaffold protein 3                                  | 1.25 |
| LRRC45      | leucine rich repeat containing 45                         | 1.25 |
| NT5M        | 5',3'-nucleotidase, mitochondrial                         | 1.25 |
| RP11_61J195 |                                                           | 1.25 |
| SCPEP1      | serine carboxypeptidase 1                                 | 1.25 |
| TPM2        | tropomyosin 2                                             | 1.25 |
| ABCB9       | ATP binding cassette subfamily B member 9                 | 1.24 |
| ABCC5       | ATP binding cassette subfamily C member 5                 | 1.24 |
| ADAM15      | ADAM metallopeptidase domain 15                           | 1.24 |
| BCL9        | BCL9 transcription coactivator                            | 1.24 |
| CDK5        | cyclin dependent kinase 5                                 | 1.24 |
| FAAP24      | FA core complex associated protein 24                     | 1.24 |
| GPAA1       | glycosylphosphatidylinositol anchor attachment 1          | 1.24 |
| LAMB3       | laminin subunit beta 3                                    | 1.24 |
| SCRIB       | scribble planar cell polarity protein                     | 1.24 |
| SLC7A6      | solute carrier family 7 member 6                          | 1.24 |
| SPAG4       | sperm associated antigen 4                                | 1.24 |
| BLVRA       | biliverdin reductase A                                    | 1.23 |
| FTH1P11     | ferritin heavy chain 1 pseudogene 11                      | 1.23 |
| PDLIM7      | PDZ and LIM domain 7                                      | 1.23 |
| PRIM2       | DNA primase subunit 2                                     | 1.23 |
| SEPT5-GP1BB | SEPT5-GP1BB readthrough                                   | 1.23 |
| TUBG2       | tubulin gamma 2                                           | 1.23 |
| ZKSCAN3     | zinc finger with KRAB and SCAN domains 3                  | 1.23 |
| ZNF517      | zinc finger protein 517                                   | 1.23 |
| CBX8        | chromobox 8                                               | 1.22 |
| FTL         | ferritin light chain                                      | 1.22 |
| GSDME       | gasdermin E                                               | 1.22 |
| IQANK1      | IQ motif and ankyrin repeat containing 1                  | 1.22 |



|              |                                                                    |      |
|--------------|--------------------------------------------------------------------|------|
| MECOM        | MDS1 and EVI1 complex locus                                        | 1.22 |
| TARBP1       | TAR (HIV-1) RNA binding protein 1                                  | 1.22 |
| TRPS1        | transcriptional repressor GATA binding 1                           | 1.22 |
| TUBA1B       | tubulin alpha 1b                                                   | 1.22 |
| CHTF18       | chromosome transmission fidelity factor 18                         | 1.21 |
| CNKSR2       | connector enhancer of kinase suppressor of Ras 2                   | 1.21 |
| H2BC21       | H2B clustered histone 21                                           | 1.21 |
| LAGE3        | L antigen family member 3                                          | 1.21 |
| MKLN1-AS     | MKLN1 antisense RNA                                                | 1.21 |
| PLP2         | proteolipid protein 2                                              | 1.21 |
| SORT1        | sortilin 1                                                         | 1.21 |
| TAGLN2       | transgelin 2                                                       | 1.21 |
| TIGD1        | tigger transposable element derived 1                              | 1.21 |
| ATP6V1E2     | ATPase H+ transporting V1 subunit E2                               | 1.2  |
| C20orf27     | chromosome 20 open reading frame 27                                | 1.2  |
| H2AX         | H2A.X variant histone                                              | 1.2  |
| KITLG        | KIT ligand                                                         | 1.2  |
| MNS1         | meiosis specific nuclear structural 1                              | 1.2  |
| NEU1         | neuraminidase 1                                                    | 1.2  |
| ZNF213       | zinc finger protein 213                                            | 1.2  |
| ARL2         | ADP ribosylation factor like GTPase 2                              | 1.19 |
| CUEDC1       | CUE domain containing 1                                            | 1.19 |
| EXTL3-AS1    | EXTL3 antisense RNA 1                                              | 1.19 |
| FTLP3        | ferritin light chain pseudogene 3                                  | 1.19 |
| HSF4         | heat shock transcription factor 4                                  | 1.19 |
| ITGA7        | integrin subunit alpha 7                                           | 1.19 |
| LOX          | lysyl oxidase                                                      | 1.19 |
| RP11_346C203 |                                                                    | 1.19 |
| TET1         | tet methylcytosine dioxygenase 1                                   | 1.19 |
| VPS72        | vacuolar protein sorting 72 homolog                                | 1.19 |
| BOLA2-SMG1P6 | BOLA2-SMG1P6 readthrough                                           | 1.18 |
| C1orf35      | chromosome 1 open reading frame 35                                 | 1.18 |
| FANCG        | FA complementation group G                                         | 1.18 |
| HMGN3-AS1    | HMGN3 antisense RNA 1                                              | 1.18 |
| HSP90AB3P    | heat shock protein 90 alpha family class B member 3, pseudogene    | 1.18 |
| KDM4A-AS1    | KDM4A antisense RNA 1                                              | 1.18 |
| LAMA4        | laminin subunit alpha 4                                            | 1.18 |
| LOXL2        | lysyl oxidase like 2                                               | 1.18 |
| MIF          | macrophage migration inhibitory factor                             | 1.18 |
| MSH2         | mutS homolog 2                                                     | 1.18 |
| NAGPA        | N-acetylglucosamine-1-phosphodiester alpha-N-acetylglucosaminidase | 1.18 |
| SLC35E4      | solute carrier family 35 member E4                                 | 1.18 |
| CCHCR1       | coiled-coil alpha-helical rod protein 1                            | 1.17 |
| CPT1C        | carnitine palmitoyltransferase 1C                                  | 1.17 |
| FAM86JP      | family with sequence similarity 86, member A pseudogene            | 1.17 |
| H2AC6        | H2A clustered histone 6                                            | 1.17 |
| LLGL1        | LLGL scribble cell polarity complex component 1                    | 1.17 |
| RPL13P5      | ribosomal protein L13 pseudogene 5                                 | 1.17 |
| SF3B4        | splicing factor 3b subunit 4                                       | 1.17 |
| AC1294921    |                                                                    | 1.16 |
| CTC_251D131  |                                                                    | 1.16 |
| FAM53A       | family with sequence similarity 53 member A                        | 1.16 |
| LAMC1        | laminin subunit gamma 1                                            | 1.16 |
| LHX4         | LIM homeobox 4                                                     | 1.16 |
| LINC00235    | long intergenic non-protein coding RNA 235                         | 1.16 |
| LOC101927151 | uncharacterized LOC101927151                                       | 1.16 |
| NDRG3        | NDRG family member 3                                               | 1.16 |

|              |                                                                      |      |
|--------------|----------------------------------------------------------------------|------|
| NSUN5P2      | NSUN5 pseudogene 2                                                   | 1.16 |
| PKN3         | protein kinase N3                                                    | 1.16 |
| SPACA9       | sperm acrosome associated 9                                          | 1.16 |
| ZEB1-AS1     | ZEB1 antisense RNA 1                                                 | 1.16 |
| FADS2        | fatty acid desaturase 2                                              | 1.15 |
| KNTC1        | kinetochore associated 1                                             | 1.15 |
| MRPL20-DT    |                                                                      | 1.15 |
| NABP2        | nucleic acid binding protein 2                                       | 1.15 |
| PSMD4        | proteasome 26S subunit, non-ATPase 4                                 | 1.15 |
| RPS6KL1      | ribosomal protein S6 kinase like 1                                   | 1.15 |
| SMIM29       | small integral membrane protein 29                                   | 1.15 |
| TACC3        | transforming acidic coiled-coil containing protein 3                 | 1.15 |
| ZNF692       | zinc finger protein 692                                              | 1.15 |
| ZNF85        | zinc finger protein 85                                               | 1.15 |
| ACBD6        | acyl-CoA binding domain containing 6                                 | 1.14 |
| CCT3         | chaperonin containing TCP1 subunit 3                                 | 1.14 |
| EXOSC4       | exosome component 4                                                  | 1.14 |
| FIGNL1       | fidgetin like 1                                                      | 1.14 |
| LINC00240    | long intergenic non-protein coding RNA 240                           | 1.14 |
| MICB         | MHC class I polypeptide-related sequence B                           | 1.14 |
| NCAPD2       | non-SMC condensin I complex subunit D2                               | 1.14 |
| PIGZ         | phosphatidylinositol glycan anchor biosynthesis class Z              | 1.14 |
| PSPH         | phosphoserine phosphatase                                            | 1.14 |
| RP11_480A161 |                                                                      | 1.14 |
| RP11_96D18   |                                                                      | 1.14 |
| RPUSD1       | RNA pseudouridine synthase domain containing 1                       | 1.14 |
| TEAD2        | TEA domain transcription factor 2                                    | 1.14 |
| HTATSF1P2    | HIV-1 Tat specific factor 1 pseudogene 2                             | 1.13 |
| NUDT17       | nudix hydrolase 17                                                   | 1.13 |
| POLA2        | DNA polymerase alpha 2, accessory subunit                            | 1.13 |
| RP11_197N182 |                                                                      | 1.13 |
| RP1_228H135  |                                                                      | 1.13 |
| SIRT7        | sirtuin 7                                                            | 1.13 |
| SLC22A18AS   | solute carrier family 22 member 18 antisense                         | 1.13 |
| TMEM164      | transmembrane protein 164                                            | 1.13 |
| UGDH         | UDP-glucose 6-dehydrogenase                                          | 1.13 |
| ZNF174       | zinc finger protein 174                                              | 1.13 |
| ZNNT1        | ZNF706 neighboring transcript 1                                      | 1.13 |
| B3GALNT1     | beta-1,3-N-acetylgalactosaminyltransferase 1 (globoside blood group) | 1.12 |
| CEP41        | centrosomal protein 41                                               | 1.12 |
| CTC-338M12.4 | uncharacterized LOC101928649                                         | 1.12 |
| GMDS         | GDP-mannose 4,6-dehydratase                                          | 1.12 |
| MMS22L       | MMS22 like, DNA repair protein                                       | 1.12 |
| PPOX         | protoporphyrinogen oxidase                                           | 1.12 |
| RP11_496H11  |                                                                      | 1.12 |
| RUSC1        | RUN and SH3 domain containing 1                                      | 1.12 |
| SASS6        | SAS-6 centriolar assembly protein                                    | 1.12 |
| SEMA4F       | semaphorin 4F                                                        | 1.12 |
| TMEM64       | transmembrane protein 64                                             | 1.12 |
| CEP85        | centrosomal protein 85                                               | 1.11 |
| COL4A2       | collagen type IV alpha 2 chain                                       | 1.11 |
| DTYMK        | deoxythymidylate kinase                                              | 1.11 |
| LOC100287896 | uncharacterized LOC100287896                                         | 1.11 |
| NTAQ1        | N-terminal glutamine amidase 1                                       | 1.11 |
| NUP37        | nucleoporin 37                                                       | 1.11 |
| PIGC         | phosphatidylinositol glycan anchor biosynthesis class C              | 1.11 |
| PLEKHN1      | pleckstrin homology domain containing N1                             | 1.11 |



|               |                                                                    |      |
|---------------|--------------------------------------------------------------------|------|
| PRSS36        | serine protease 36                                                 | 1.07 |
| SNRPE         | small nuclear ribonucleoprotein polypeptide E                      | 1.07 |
| SNX15         | sorting nexin 15                                                   | 1.07 |
| CDK4          | cyclin dependent kinase 4                                          | 1.06 |
| CHAF1A        | chromatin assembly factor 1 subunit A                              | 1.06 |
| COL4A1        | collagen type IV alpha 1 chain                                     | 1.06 |
| CTB_25B1312   |                                                                    | 1.06 |
| CYHR1         | cysteine and histidine rich 1                                      | 1.06 |
| CYRIB         | CYFIP related Rac1 interactor B                                    | 1.06 |
| H2AZ1         | H2A.Z variant histone 1                                            | 1.06 |
| KCTD1         | potassium channel tetramerization domain containing 1              | 1.06 |
| KIF22         | kinesin family member 22                                           | 1.06 |
| KNL1          | kinetochore scaffold 1                                             | 1.06 |
| PFDN6         | prefoldin subunit 6                                                | 1.06 |
| RAB6B         | RAB6B, member RAS oncogene family                                  | 1.06 |
| SLC25A39      | solute carrier family 25 member 39                                 | 1.06 |
| TBX19         | T-box transcription factor 19                                      | 1.06 |
| TSSK6         | testis specific serine kinase 6                                    | 1.06 |
| AACS          | acetoacetyl-CoA synthetase                                         | 1.05 |
| ATP6V1H       | ATPase H <sup>+</sup> transporting V1 subunit H                    | 1.05 |
| B9D1          | B9 domain containing 1                                             | 1.05 |
| KCNE3         | potassium voltage-gated channel subfamily E regulatory subunit 3   | 1.05 |
| NCAPG2        | non-SMC condensin II complex subunit G2                            | 1.05 |
| PPIH          | peptidylprolyl isomerase H                                         | 1.05 |
| TMEM101       | transmembrane protein 101                                          | 1.05 |
| U91328.1      |                                                                    | 1.05 |
| ZNF815P       | zinc finger protein 815, pseudogene                                | 1.05 |
| AC009133.12   |                                                                    | 1.04 |
| ASB16-AS1     | ASB16 antisense RNA 1                                              | 1.04 |
| C8orf33       | chromosome 8 open reading frame 33                                 | 1.04 |
| CH507-513H4.5 |                                                                    | 1.04 |
| DDX12P        | DEAD/H-box helicase 12, pseudogene                                 | 1.04 |
| E2F5          | E2F transcription factor 5                                         | 1.04 |
| FAM50A        | family with sequence similarity 50 member A                        | 1.04 |
| GINS3         | GINS complex subunit 3                                             | 1.04 |
| LA16C_390E64  |                                                                    | 1.04 |
| LINC01126     | long intergenic non-protein coding RNA 1126                        | 1.04 |
| MAD1L1        | mitotic arrest deficient 1 like 1                                  | 1.04 |
| NRM           | nurim                                                              | 1.04 |
| SVBP          | small vasohibin binding protein                                    | 1.04 |
| ZNF605        | zinc finger protein 605                                            | 1.04 |
| ADAMTS7       | ADAM metalloproteinase with thrombospondin type 1 motif 7          | 1.03 |
| AMDHD2        | amidohydrolase domain containing 2                                 | 1.03 |
| AP0062222     |                                                                    | 1.03 |
| ATP5MF-PTCD1  | ATP5MF-PTCD1 readthrough                                           | 1.03 |
| BICD1         | BICD cargo adaptor 1                                               | 1.03 |
| CAPN10-DT     | CAPN10 divergent transcript                                        | 1.03 |
| EEF1E1        | eukaryotic translation elongation factor 1 epsilon 1               | 1.03 |
| FHIT          | fragile histidine triad diadenosine triphosphatase                 | 1.03 |
| GLA           | galactosidase alpha                                                | 1.03 |
| GNPDA1        | glucosamine-6-phosphate deaminase 1                                | 1.03 |
| KLC2          | kinesin light chain 2                                              | 1.03 |
| LOC102724238  | uncharacterized LOC102724238                                       | 1.03 |
| LSM2          | LSM2 homolog, U6 small nuclear RNA and mRNA degradation associated | 1.03 |
| MSH5          | mutS homolog 5                                                     | 1.03 |
| NME2          | NME/NM23 nucleoside diphosphate kinase 2                           | 1.03 |
| PFDN4         | prefoldin subunit 4                                                | 1.03 |

|               |                                                                    |       |
|---------------|--------------------------------------------------------------------|-------|
| RNF139-AS1    | RNF139 antisense RNA 1 (head to head)                              | 1.03  |
| RRP9          | ribosomal RNA processing 9, U3 small nucleolar RNA binding protein | 1.03  |
| TSTA3         | tissue specific transplantation antigen P35B                       | 1.03  |
| ZNF691        | zinc finger protein 691                                            | 1.03  |
| ZNF696        | zinc finger protein 696                                            | 1.03  |
| APIP          | APAF1 interacting protein                                          | 1.02  |
| BBS12         | Bardet-Biedl syndrome 12                                           | 1.02  |
| DAPK2         | death associated protein kinase 2                                  | 1.02  |
| FAM110A       | family with sequence similarity 110 member A                       | 1.02  |
| GALNT10       | polypeptide N-acetylgalactosaminyltransferase 10                   | 1.02  |
| IFT80         | intraflagellar transport 80                                        | 1.02  |
| KIAA1614      | KIAA1614                                                           | 1.02  |
| KMT5C         | lysine methyltransferase 5C                                        | 1.02  |
| LINC01772     | long intergenic non-protein coding RNA 1772                        | 1.02  |
| MCM3          | minichromosome maintenance complex component 3                     | 1.02  |
| ROBO3         | roundabout guidance receptor 3                                     | 1.02  |
| RP11_106M33   |                                                                    | 1.02  |
| SLC1A3        | solute carrier family 1 member 3                                   | 1.02  |
| SMC4          | structural maintenance of chromosomes 4                            | 1.02  |
| SMYD2         | SET and MYND domain containing 2                                   | 1.02  |
| SNRPC         | small nuclear ribonucleoprotein polypeptide C                      | 1.02  |
| SPINDOC       | spindlin interactor and repressor of chromatin binding             | 1.02  |
| TTF2          | transcription termination factor 2                                 | 1.02  |
| TUBA1C        | tubulin alpha 1c                                                   | 1.02  |
| ATRIP         | ATR interacting protein                                            | 1.01  |
| BORA          | BORA aurora kinase A activator                                     | 1.01  |
| CCDC137       | coiled-coil domain containing 137                                  | 1.01  |
| DLGAP1-AS1    | DLGAP1 antisense RNA 1                                             | 1.01  |
| LOC105369779  | uncharacterized LOC105369779                                       | 1.01  |
| MVP           | major vault protein                                                | 1.01  |
| NOL3          | nucleolar protein 3                                                | 1.01  |
| PARS2         | prolyl-tRNA synthetase 2, mitochondrial                            | 1.01  |
| PIK3R2        | phosphoinositide-3-kinase regulatory subunit 2                     | 1.01  |
| PPP1R16A      | protein phosphatase 1 regulatory subunit 16A                       | 1.01  |
| SLC16A1-AS1   | SLC16A1 antisense RNA 1                                            | 1.01  |
| STIP1         | stress induced phosphoprotein 1                                    | 1.01  |
| TLCD5         | TLC domain containing 5                                            | 1.01  |
| ZNF219        | zinc finger protein 219                                            | 1.01  |
| C7orf50       | chromosome 7 open reading frame 50                                 | 1     |
| CH17-340M24.3 | uncharacterized protein BC009467                                   | 1     |
| CIART         | circadian associated repressor of transcription                    | 1     |
| FTH1          | ferritin heavy chain 1                                             | 1     |
| GRIN2D        | glutamate ionotropic receptor NMDA type subunit 2D                 | 1     |
| IQCC          | IQ motif containing C                                              | 1     |
| LPCAT2        | lysophosphatidylcholine acyltransferase 2                          | 1     |
| MAPKAPK5-AS1  | MAPKAPK5 antisense RNA 1                                           | 1     |
| MYL6B         | myosin light chain 6B                                              | 1     |
| PCDH17        | protocadherin 17                                                   | 1     |
| PPIAP22       | peptidylprolyl isomerase A pseudogene 22                           | 1     |
| S100A6        | S100 calcium binding protein A6                                    | 1     |
| SAMD1         | sterile alpha motif domain containing 1                            | 1     |
| VPS45         | vacuolar protein sorting 45 homolog                                | 1     |
| WASF1         | WASP family member 1                                               | 1     |
| FTCDNL1       | formiminotransferase cyclodeaminase N-terminal like                | -1    |
| LOC100288798  | uncharacterized LOC100288798                                       | -1    |
| ABCD3         | ATP binding cassette subfamily D member 3                          | -1.01 |
| FAH           | fumarylacetoacetate hydrolase                                      | -1.01 |

|                  |                                                                               |       |
|------------------|-------------------------------------------------------------------------------|-------|
| FAHD2A           | fumarylacetoacetate hydrolase domain containing 2A                            | -1.01 |
| FBXO21           | F-box protein 21                                                              | -1.01 |
| HPN-AS1          | HPN antisense RNA 1                                                           | -1.01 |
| IQGAP2           | IQ motif containing GTPase activating protein 2                               | -1.01 |
| MAP1LC3A         | microtubule associated protein 1 light chain 3 alpha                          | -1.01 |
| PDXDC2P-NPIPB14P | nuclear pore complex-interacting protein                                      | -1.01 |
| RAB37            | RAB37, member RAS oncogene family                                             | -1.01 |
| SEC24B           | SEC24 homolog B, COPII coat complex component                                 | -1.01 |
| WFIKKN1          | WAP, follistatin/kazal, immunoglobulin, kunitz and netrin domain containing 1 | -1.01 |
| ZDHHC11          | zinc finger DHHC-type containing 11                                           | -1.01 |
| ASS1P12          | argininosuccinate synthetase 1 pseudogene 12                                  | -1.02 |
| CCDC198          | coiled-coil domain containing 198                                             | -1.02 |
| CNOT6L           | CCR4-NOT transcription complex subunit 6 like                                 | -1.02 |
| COL18A1          | collagen type XVIII alpha 1 chain                                             | -1.02 |
| CPEB4            | cytoplasmic polyadenylation element binding protein 4                         | -1.02 |
| CROCCP2          | CROCC pseudogene 2                                                            | -1.02 |
| DNMBP            | dynamamin binding protein                                                     | -1.02 |
| FES              | FES proto-oncogene, tyrosine kinase                                           | -1.02 |
| FYN              | FYN proto-oncogene, Src family tyrosine kinase                                | -1.02 |
| HPS5             | HPS5 biogenesis of lysosomal organelles complex 2 subunit 2                   | -1.02 |
| KDF1             | keratinocyte differentiation factor 1                                         | -1.02 |
| KIAA1671         | KIAA1671                                                                      | -1.02 |
| MCL1             | MCL1 apoptosis regulator, BCL2 family member                                  | -1.02 |
| NPR1             | natriuretic peptide receptor 1                                                | -1.02 |
| P2RX5-TAX1BP3    | P2RX5-TAX1BP3 readthrough (NMD candidate)                                     | -1.02 |
| PCAT7            | prostate cancer associated transcript 7                                       | -1.02 |
| PEAR1            | platelet endothelial aggregation receptor 1                                   | -1.02 |
| PER2             | period circadian regulator 2                                                  | -1.02 |
| RAPGEF5          | Rap guanine nucleotide exchange factor 5                                      | -1.02 |
| RMDN2            | regulator of microtubule dynamics 2                                           | -1.02 |
| RP11-470M1.2     |                                                                               | -1.02 |
| TTC39B           | tetratricopeptide repeat domain 39B                                           | -1.02 |
| ZNF154           | zinc finger protein 154                                                       | -1.02 |
| C4orf19          | chromosome 4 open reading frame 19                                            | -1.03 |
| CCNB1IP1         | cyclin B1 interacting protein 1                                               | -1.03 |
| CFH              | complement factor H                                                           | -1.03 |
| ETS1             | ETS proto-oncogene 1, transcription factor                                    | -1.03 |
| GCHFR            | GTP cyclohydrolase I feedback regulator                                       | -1.03 |
| GNG7             | G protein subunit gamma 7                                                     | -1.03 |
| KLF8             | Kruppel like factor 8                                                         | -1.03 |
| LONRF1           | LON peptidase N-terminal domain and ring finger 1                             | -1.03 |
| MYO1B            | myosin IB                                                                     | -1.03 |
| PUS10            | pseudouridine synthase 10                                                     | -1.03 |
| SEMA5A           | semaphorin 5A                                                                 | -1.03 |
| SUCLG2P2         | SUCLG2 pseudogene 2                                                           | -1.03 |
| TRAM2            | translocation associated membrane protein 2                                   | -1.03 |
| TTC39C           | tetratricopeptide repeat domain 39C                                           | -1.03 |
| ARMH1            | armadillo like helical domain containing 1                                    | -1.04 |
| CFI              | complement factor I                                                           | -1.04 |
| CTD_2555O164     |                                                                               | -1.04 |
| GLIPR1L2         | GLIPR1 like 2                                                                 | -1.04 |
| GLYCK            | glycerate kinase                                                              | -1.04 |
| KCNAB3           | potassium voltage-gated channel subfamily A regulatory beta subunit 3         | -1.04 |
| MTRNR2L12        | MT-RNR2 like 12                                                               | -1.04 |
| OXER1            | oxoeicosanoid receptor 1                                                      | -1.04 |
| PNMA8B           | PNMA family member 8B                                                         | -1.04 |
| RECK             | reversion inducing cysteine rich protein with kazal motifs                    | -1.04 |

|                |                                                    |       |
|----------------|----------------------------------------------------|-------|
| RP11_799B121   |                                                    | -1.04 |
| RPL17-C18orf32 | RPL17-C18orf32 readthrough                         | -1.04 |
| SIK2           | salt inducible kinase 2                            | -1.04 |
| SULT1A1        | sulfotransferase family 1A member 1                | -1.04 |
| USP6NL         | USP6 N-terminal like                               | -1.04 |
| ZFP1           | ZFP1 zinc finger protein                           | -1.04 |
| ZNF141         | zinc finger protein 141                            | -1.04 |
| A1BG-AS1       | A1BG antisense RNA 1                               | -1.05 |
| FAM167B        | family with sequence similarity 167 member B       | -1.05 |
| HDAC6          | histone deacetylase 6                              | -1.05 |
| LINC02532      | long intergenic non-protein coding RNA 2532        | -1.05 |
| MGMT           | O-6-methylguanine-DNA methyltransferase            | -1.05 |
| MYD88          | MYD88 innate immune signal transduction adaptor    | -1.05 |
| PTPN21         | protein tyrosine phosphatase non-receptor type 21  | -1.05 |
| RAB17          | RAB17, member RAS oncogene family                  | -1.05 |
| RP11_23N24     |                                                    | -1.05 |
| SLC19A2        | solute carrier family 19 member 2                  | -1.05 |
| SLC8A1         | solute carrier family 8 member A1                  | -1.05 |
| SUCLG2         | succinate-CoA ligase GDP-forming subunit beta      | -1.05 |
| SULT1A2        | sulfotransferase family 1A member 2                | -1.05 |
| ZNF462         | zinc finger protein 462                            | -1.05 |
| ANTXR2         | ANTXR cell adhesion molecule 2                     | -1.06 |
| DIP2C          | disco interacting protein 2 homolog C              | -1.06 |
| FLNB-AS1       |                                                    | -1.06 |
| HIVEP1         | HIVEP zinc finger 1                                | -1.06 |
| HNF1B          | HNF1 homeobox B                                    | -1.06 |
| PROX1          | prospero homeobox 1                                | -1.06 |
| PRR22          | proline rich 22                                    | -1.06 |
| RAB20          | RAB20, member RAS oncogene family                  | -1.06 |
| RASGRP1        | RAS guanyl releasing protein 1                     | -1.06 |
| REL            | REL proto-oncogene, NF-kB subunit                  | -1.06 |
| REPS2          | RALBP1 associated Eps domain containing 2          | -1.06 |
| TJP2           | tight junction protein 2                           | -1.06 |
| ZNF471         | zinc finger protein 471                            | -1.06 |
| ZRANB1         | zinc finger RANBP2-type containing 1               | -1.06 |
| ZSWIM6         | zinc finger SWIM-type containing 6                 | -1.06 |
| ACO1           | aconitase 1                                        | -1.07 |
| AGPAT2         | 1-acylglycerol-3-phosphate O-acyltransferase 2     | -1.07 |
| ALDH1B1        | aldehyde dehydrogenase 1 family member B1          | -1.07 |
| B4GALT1-AS1    | B4GALT1 antisense RNA 1                            | -1.07 |
| CTD_2240E144   |                                                    | -1.07 |
| IFNAR1         | interferon alpha and beta receptor subunit 1       | -1.07 |
| IL6ST          | interleukin 6 signal transducer                    | -1.07 |
| IPO5P1         | importin 5 pseudogene 1                            | -1.07 |
| MTHFS          | methenyltetrahydrofolate synthetase                | -1.07 |
| PLD1           | phospholipase D1                                   | -1.07 |
| QSOX1          | quiescin sulfhydryl oxidase 1                      | -1.07 |
| RP11_182J117   |                                                    | -1.07 |
| ST3GAL6        | ST3 beta-galactoside alpha-2,3-sialyltransferase 6 | -1.07 |
| TIPARP         | TCDD inducible poly(ADP-ribose) polymerase         | -1.07 |
| TSPAN9         | tetraspanin 9                                      | -1.07 |
| APOL6          | apolipoprotein L6                                  | -1.08 |
| C17orf100      | chromosome 17 open reading frame 100               | -1.08 |
| CCND1          | cyclin D1                                          | -1.08 |
| CCT6B          | chaperonin containing TCP1 subunit 6B              | -1.08 |
| CSAD           | cysteine sulfinic acid decarboxylase               | -1.08 |
| HGD            | homogentisate 1,2-dioxygenase                      | -1.08 |

|               |                                                       |       |
|---------------|-------------------------------------------------------|-------|
| KLHL2         | kelch like family member 2                            | -1.08 |
| MEG3          | maternally expressed 3                                | -1.08 |
| PGM1          | phosphoglucomutase 1                                  | -1.08 |
| RP11_338I211  |                                                       | -1.08 |
| SH3BGRL2      | SH3 domain binding glutamate rich protein like 2      | -1.08 |
| SHH           | sonic hedgehog signaling molecule                     | -1.08 |
| SUCNR1        | succinate receptor 1                                  | -1.08 |
| TINAGL1       | tubulointerstitial nephritis antigen like 1           | -1.08 |
| UNC13D        | unc-13 homolog D                                      | -1.08 |
| WWC2          | WW and C2 domain containing 2                         | -1.08 |
| CLDN1         | claudin 1                                             | -1.09 |
| CTSW          | cathepsin W                                           | -1.09 |
| DCUN1D3       | defective in cullin neddylation 1 domain containing 3 | -1.09 |
| DNAJC25       | DnaJ heat shock protein family (Hsp40) member C25     | -1.09 |
| FAS           | Fas cell surface death receptor                       | -1.09 |
| GIMAP5        | GTPase, IMAP family member 5                          | -1.09 |
| IER2          | immediate early response 2                            | -1.09 |
| KLF10         | Kruppel like factor 10                                | -1.09 |
| NCALD         | neurocalcin delta                                     | -1.09 |
| PRCD          | photoreceptor disc component                          | -1.09 |
| RP11_373L241  |                                                       | -1.09 |
| SLC43A3       | solute carrier family 43 member 3                     | -1.09 |
| A1CF          | APOBEC1 complementation factor                        | -1.1  |
| B4GALT1       | beta-1,4-galactosyltransferase 1                      | -1.1  |
| BTG2          | BTG anti-proliferation factor 2                       | -1.1  |
| ISG20         | interferon stimulated exonuclease gene 20             | -1.1  |
| NAP1L5        | nucleosome assembly protein 1 like 5                  | -1.1  |
| OXCT2         | 3-oxoacid CoA-transferase 2                           | -1.1  |
| PDE4B         | phosphodiesterase 4B                                  | -1.1  |
| PSD4          | pleckstrin and Sec7 domain containing 4               | -1.1  |
| RAPGEF4       | Rap guanine nucleotide exchange factor 4              | -1.1  |
| RP11-903H12.5 |                                                       | -1.1  |
| RP11_544M2213 |                                                       | -1.1  |
| TSPAN7        | tetraspanin 7                                         | -1.1  |
| TSPYL2        | TSPY like 2                                           | -1.1  |
| TTPAL         | alpha tocopherol transfer protein like                | -1.1  |
| AGBL2         | ATP/GTP binding protein like 2                        | -1.11 |
| ARRB1         | arrestin beta 1                                       | -1.11 |
| CBLN3         | cerebellin 3 precursor                                | -1.11 |
| DBT           | dihydrolipoamide branched chain transacylase E2       | -1.11 |
| ESR2          | estrogen receptor 2                                   | -1.11 |
| FGFR1         | fibroblast growth factor receptor 1                   | -1.11 |
| JDP2          | Jun dimerization protein 2                            | -1.11 |
| MLYCD         | malonyl-CoA decarboxylase                             | -1.11 |
| POR           | cytochrome p450 oxidoreductase                        | -1.11 |
| RHOA          | ras homolog family member U                           | -1.11 |
| RPH3AL        | rabphilin 3A like (without C2 domains)                | -1.11 |
| ZNF395        | zinc finger protein 395                               | -1.11 |
| CCL5          | C-C motif chemokine ligand 5                          | -1.12 |
| CYB5D2        | cytochrome b5 domain containing 2                     | -1.12 |
| FXSD6         | FXSD domain containing ion transport regulator 6      | -1.12 |
| IFITM1        | interferon induced transmembrane protein 1            | -1.12 |
| INHBB         | inhibin subunit beta B                                | -1.12 |
| PARP15        | poly(ADP-ribose) polymerase family member 15          | -1.12 |
| RAD54L2       | RAD54 like 2                                          | -1.12 |
| ARSD          | arylsulfatase D                                       | -1.13 |
| C9orf72       | C9orf72-SMCR8 complex subunit                         | -1.13 |



|              |                                                           |       |
|--------------|-----------------------------------------------------------|-------|
| DAAM2        | dishevelled associated activator of morphogenesis 2       | -1.13 |
| EIF5         | eukaryotic translation initiation factor 5                | -1.13 |
| LDB2         | LIM domain binding 2                                      | -1.13 |
| NADK2        | NAD kinase 2, mitochondrial                               | -1.13 |
| NAT1         | N-acetyltransferase 1                                     | -1.13 |
| P3H2         | prolyl 3-hydroxylase 2                                    | -1.13 |
| RP11_417L195 |                                                           | -1.13 |
| RP11_96D111  |                                                           | -1.13 |
| SCML4        | Scm polycomb group protein like 4                         | -1.13 |
| UAP1         | UDP-N-acetylglucosamine pyrophosphorylase 1               | -1.13 |
| ARAP2        | ArfGAP with RhoGAP domain, ankyrin repeat and PH domain 2 | -1.14 |
| ATXN1-AS1    | ATXN1 antisense RNA 1                                     | -1.14 |
| GRHPR        | glyoxylate and hydroxypyruvate reductase                  | -1.14 |
| IKZF1        | IKAROS family zinc finger 1                               | -1.14 |
| LTBP1        | latent transforming growth factor beta binding protein 1  | -1.14 |
| MT-ND6       | NADH dehydrogenase, subunit 6 (complex I)                 | -1.14 |
| NKG7         | natural killer cell granule protein 7                     | -1.14 |
| PHLDB2       | pleckstrin homology like domain family B member 2         | -1.14 |
| PNRC1        | proline rich nuclear receptor coactivator 1               | -1.14 |
| PPFIBP2      | PPFIA binding protein 2                                   | -1.14 |
| SLA2         | Src like adaptor 2                                        | -1.14 |
| TBX21        | T-box transcription factor 21                             | -1.14 |
| TIGIT        | T cell immunoreceptor with Ig and ITIM domains            | -1.14 |
| ZNF160       | zinc finger protein 160                                   | -1.14 |
| ABHD18       | abhydrolase domain containing 18                          | -1.15 |
| ACBD4        | acyl-CoA binding domain containing 4                      | -1.15 |
| ENPP1        | ectonucleotide pyrophosphatase/phosphodiesterase 1        | -1.15 |
| FANCC        | FA complementation group C                                | -1.15 |
| MT-RNR2      | l-rRNA                                                    | -1.15 |
| TMC8         | transmembrane channel like 8                              | -1.15 |
| TMEM178A     | transmembrane protein 178A                                | -1.15 |
| ZC3H13       | zinc finger CCCH-type containing 13                       | -1.15 |
| EDEM1        | ER degradation enhancing alpha-mannosidase like protein 1 | -1.16 |
| LILRB2       | leukocyte immunoglobulin like receptor B2                 | -1.16 |
| LURAP1L      | leucine rich adaptor protein 1 like                       | -1.16 |
| NONOP2       | non-POU domain containing, octamer-binding pseudogene 2   | -1.16 |
| RORA         | RAR related orphan receptor A                             | -1.16 |
| RPL5P30      | ribosomal protein L5 pseudogene 30                        | -1.16 |
| STARD5       | StAR related lipid transfer domain containing 5           | -1.16 |
| ACER2        | alkaline ceramidase 2                                     | -1.17 |
| ADGRE4P      | adhesion G protein-coupled receptor E4, pseudogene        | -1.17 |
| AGL          | amylase-like 1, 6-glucosidase, 4-alpha-glucanotransferase | -1.17 |
| BST1         | bone marrow stromal cell antigen 1                        | -1.17 |
| C21orf91     | chromosome 21 open reading frame 91                       | -1.17 |
| CLNK         | cytokine dependent hematopoietic cell linker              | -1.17 |
| GNG12-AS1    | GNG12, DIRAS3 and WLS antisense RNA 1                     | -1.17 |
| LOC101929343 | uncharacterized LOC101929343                              | -1.17 |
| MIRLET7BHG   | MIRLET7B host gene                                        | -1.17 |
| PLA2G12B     | phospholipase A2 group XIIIB                              | -1.17 |
| PRODH2       | proline dehydrogenase 2                                   | -1.17 |
| RPSAP70      | ribosomal protein SA pseudogene 70                        | -1.17 |
| SLC9A9       | solute carrier family 9 member A9                         | -1.17 |
| ATP11C       | ATPase phospholipid transporting 11C                      | -1.18 |
| CBFA2T3      | CBFA2/RUNX1 partner transcriptional co-repressor 3        | -1.18 |
| CDA          | cytidine deaminase                                        | -1.18 |
| CHP1         | calcineurin like EF-hand protein 1                        | -1.18 |
| CTS0         | cathepsin O                                               | -1.18 |

|              |                                                                              |       |
|--------------|------------------------------------------------------------------------------|-------|
| ERVK9-11     |                                                                              | -1.18 |
| KCNAB1       | potassium voltage-gated channel subfamily A member regulatory beta subunit 1 | -1.18 |
| LINC01197    | long intergenic non-protein coding RNA 1197                                  | -1.18 |
| LINC02762    | long intergenic non-protein coding RNA 2762                                  | -1.18 |
| MAGI2-AS3    | MAGI2 antisense RNA 3                                                        | -1.18 |
| PROX1-AS1    | PROX1 antisense RNA 1                                                        | -1.18 |
| PRRG2        | proline rich and Gla domain 2                                                | -1.18 |
| RP11_196G113 |                                                                              | -1.18 |
| RP11_298J204 |                                                                              | -1.18 |
| STARD4-AS1   | STARD4 antisense RNA 1                                                       | -1.18 |
| ACADM        | acyl-CoA dehydrogenase medium chain                                          | -1.19 |
| ADK          | adenosine kinase                                                             | -1.19 |
| AKAP5        | A-kinase anchoring protein 5                                                 | -1.19 |
| CTC_425O232  |                                                                              | -1.19 |
| DCAF11       | DDB1 and CUL4 associated factor 11                                           | -1.19 |
| LN2          | ligand of numb-protein X 2                                                   | -1.19 |
| LOC105370854 |                                                                              | -1.19 |
| NPHP4        | nephrocystin 4                                                               | -1.19 |
| SALL1        | spalt like transcription factor 1                                            | -1.19 |
| SLC17A9      | solute carrier family 17 member 9                                            | -1.19 |
| TLE2         | TLE family member 2, transcriptional corepressor                             | -1.19 |
| ZFP3         | ZFP3 zinc finger protein                                                     | -1.19 |
| BMS1P2-AGAP9 |                                                                              | -1.2  |
| C1RL         | complement C1r subcomponent like                                             | -1.2  |
| CDKN1C       | cyclin dependent kinase inhibitor 1C                                         | -1.2  |
| ENTPD5       | ectonucleoside triphosphate diphosphohydrolase 5 (inactive)                  | -1.2  |
| FOXA3        | forkhead box A3                                                              | -1.2  |
| FRMD6        | FERM domain containing 6                                                     | -1.2  |
| FURIN        | furin, paired basic amino acid cleaving enzyme                               | -1.2  |
| HOOK1        | hook microtubule tethering protein 1                                         | -1.2  |
| ITIH4-AS1    | ITIH4 antisense RNA 1                                                        | -1.2  |
| NDEL1        | nudE neurodevelopment protein 1 like 1                                       | -1.2  |
| PROS1        | protein S                                                                    | -1.2  |
| QDPR         | quinoid dihydropteridine reductase                                           | -1.2  |
| SERPINB9     | serpin family B member 9                                                     | -1.2  |
| SPRY2        | sprouty RTK signaling antagonist 2                                           | -1.2  |
| TP53INP2     | tumor protein p53 inducible nuclear protein 2                                | -1.2  |
| USP12        | ubiquitin specific peptidase 12                                              | -1.2  |
| FMO4         | flavin containing dimethylaniline monooxygenase 4                            | -1.21 |
| IRF2BP1      | interferon regulatory factor 2 binding protein like                          | -1.21 |
| LOC101927752 | uncharacterized LOC101927752                                                 | -1.21 |
| ONECUT1      | one cut homeobox 1                                                           | -1.21 |
| PAPSS2       | 3'-phosphoadenosine 5'-phosphosulfate synthase 2                             | -1.21 |
| RP11_295K31  |                                                                              | -1.21 |
| SAMD4A       | sterile alpha motif domain containing 4A                                     | -1.21 |
| SLC22A9      | solute carrier family 22 member 9                                            | -1.21 |
| SORD2P       | sorbitol dehydrogenase 2, pseudogene                                         | -1.21 |
| WDFY3-AS2    | WDFY3 antisense RNA 2                                                        | -1.21 |
| WEE1         | WEE1 G2 checkpoint kinase                                                    | -1.21 |
| BDH2         | 3-hydroxybutyrate dehydrogenase 2                                            | -1.22 |
| C19orf71     | chromosome 19 open reading frame 71                                          | -1.22 |
| CLN8         | CLN8 transmembrane ER and ERGIC protein                                      | -1.22 |
| KLF9         | Kruppel like factor 9                                                        | -1.22 |
| MTARC2       | mitochondrial amidoxime reducing component 2                                 | -1.22 |
| PECR         | peroxisomal trans-2-enoyl-CoA reductase                                      | -1.22 |
| RP11_158M23  |                                                                              | -1.22 |
| SIGLEC7      | sialic acid binding Ig like lectin 7                                         | -1.22 |

|              |                                                                 |       |
|--------------|-----------------------------------------------------------------|-------|
| STEAP3       | STEAP3 metalloredutase                                          | -1.22 |
| TMPRSS13     | transmembrane serine protease 13                                | -1.22 |
| VAT1L        | vesicle amine transport 1 like                                  | -1.22 |
| ASGR1        | asialoglycoprotein receptor 1                                   | -1.23 |
| BCAR3-AS1    | BCAR3 antisense RNA 1                                           | -1.23 |
| DGAT2        | diacylglycerol O-acyltransferase 2                              | -1.23 |
| KIAA0040     | KIAA0040                                                        | -1.23 |
| NR3C2        | nuclear receptor subfamily 3 group C member 2                   | -1.23 |
| SYTL5        | synaptotagmin like 5                                            | -1.23 |
| TMEM25       | transmembrane protein 25                                        | -1.23 |
| AMOTL1       | angiotonin like 1                                               | -1.24 |
| BASP1        | brain abundant membrane attached signal protein 1               | -1.24 |
| CYP4F3       | cytochrome P450 family 4 subfamily F member 3                   | -1.24 |
| FAM229B      | family with sequence similarity 229 member B                    | -1.24 |
| HIC1         | HIC ZBTB transcriptional repressor 1                            | -1.24 |
| PLA2R1       | phospholipase A2 receptor 1                                     | -1.24 |
| TRIM10       | tripartite motif containing 10                                  | -1.24 |
| TUBBP10      | tubulin beta class I pseudogene 10                              | -1.24 |
| ZCCHC24      | zinc finger CCHC-type containing 24                             | -1.24 |
| CD27         | CD27 molecule                                                   | -1.25 |
| IL4R         | interleukin 4 receptor                                          | -1.25 |
| MIR99AHG     | mir-99a-let-7c cluster host gene                                | -1.25 |
| NFKBIZ       | NFKB inhibitor zeta                                             | -1.25 |
| RAPH1        | Ras association (RalGDS/AF-6) and pleckstrin homology domains 1 | -1.25 |
| SYNE1        | spectrin repeat containing nuclear envelope protein 1           | -1.25 |
| TSPYL5       | TSPY like 5                                                     | -1.25 |
| UNC5C        | unc-5 netrin receptor C                                         | -1.25 |
| AC0996685    |                                                                 | -1.26 |
| ANKRD33B     | ankyrin repeat domain 33B                                       | -1.26 |
| CDH4         | cadherin 4                                                      | -1.26 |
| GPR174       | G protein-coupled receptor 174                                  | -1.26 |
| PPIEL        | peptidylprolyl isomerase E like pseudogene                      | -1.26 |
| PSAT1        | phosphoserine aminotransferase 1                                | -1.26 |
| RAB27A       | RAB27A, member RAS oncogene family                              | -1.26 |
| RIPOR2       | RHO family interacting cell polarization regulator 2            | -1.26 |
| SPINT2       | serine peptidase inhibitor, Kunitz type 2                       | -1.26 |
| TLR4         | toll like receptor 4                                            | -1.26 |
| ABHD15       | abhydrolase domain containing 15                                | -1.27 |
| AP0066219    |                                                                 | -1.27 |
| BLNK         | B cell linker                                                   | -1.27 |
| CLYBL        | citramalyl-CoA lyase                                            | -1.27 |
| CRPPA        | CDP-L-ribitol pyrophosphorylase A                               | -1.27 |
| EGFR         | epidermal growth factor receptor                                | -1.27 |
| FAAH2        | fatty acid amide hydrolase 2                                    | -1.27 |
| MT-ND5       | NADH dehydrogenase, subunit 5 (complex I)                       | -1.27 |
| RP11_329N153 |                                                                 | -1.27 |
| SYNPO2       | synaptopodin 2                                                  | -1.27 |
| IKZF3        | IKAROS family zinc finger 3                                     | -1.28 |
| MYO1E        | myosin IE                                                       | -1.28 |
| NTN4         | netrin 4                                                        | -1.28 |
| SGK2         | serum/glucocorticoid regulated kinase 2                         | -1.28 |
| SHPK         | sedoheptulokinase                                               | -1.28 |
| SLC25A20     | solute carrier family 25 member 20                              | -1.28 |
| C16orf54     | chromosome 16 open reading frame 54                             | -1.29 |
| CHRM5        | cholinergic receptor muscarinic 5                               | -1.29 |
| DUSP16       | dual specificity phosphatase 16                                 | -1.29 |
| ERN1         | endoplasmic reticulum to nucleus signaling 1                    | -1.29 |

|              |                                                                          |       |
|--------------|--------------------------------------------------------------------------|-------|
| LINC00574    | long intergenic non-protein coding RNA 574                               | -1.29 |
| PLIN5        | perilipin 5                                                              | -1.29 |
| SYDE2        | synapse defective Rho GTPase homolog 2                                   | -1.29 |
| ARL5B        | ADP ribosylation factor like GTPase 5B                                   | -1.3  |
| ASGR2        | asialoglycoprotein receptor 2                                            | -1.3  |
| KCNMA1       | potassium calcium-activated channel subfamily M alpha 1                  | -1.3  |
| LATS2        | large tumor suppressor kinase 2                                          | -1.3  |
| NBEA         | neurobeachin                                                             | -1.3  |
| RP11_109D202 |                                                                          | -1.3  |
| SELENOP      | selenoprotein P                                                          | -1.3  |
| SLC17A1      | solute carrier family 17 member 1                                        | -1.3  |
| ACOT1        | acyl-CoA thioesterase 1                                                  | -1.31 |
| ACOT2        | acyl-CoA thioesterase 2                                                  | -1.31 |
| BCRP3        | BCR pseudogene 3                                                         | -1.31 |
| DNAJC12      | DnaJ heat shock protein family (Hsp40) member C12                        | -1.31 |
| PAH          | phenylalanine hydroxylase                                                | -1.31 |
| PDE3B        | phosphodiesterase 3B                                                     | -1.31 |
| PER1         | period circadian regulator 1                                             | -1.31 |
| PNPLA7       | patatin like phospholipase domain containing 7                           | -1.31 |
| RNF180       | ring finger protein 180                                                  | -1.31 |
| RP1_47M233   |                                                                          | -1.31 |
| SLC24A4      | solute carrier family 24 member 4                                        | -1.31 |
| SLC35D1      | solute carrier family 35 member D1                                       | -1.31 |
| TRIM22       | tripartite motif containing 22                                           | -1.31 |
| CAMK4        | calcium/calmodulin dependent protein kinase IV                           | -1.32 |
| CRYL1        | crystallin lambda 1                                                      | -1.32 |
| GIPC2        | GIPC PDZ domain containing family member 2                               | -1.32 |
| KCNK5        | potassium two pore domain channel subfamily K member 5                   | -1.32 |
| LILRB1       | leukocyte immunoglobulin like receptor B1                                | -1.32 |
| MTHFD1P1     | methylenetetrahydrofolate dehydrogenase (NADP+ dependent) 1 pseudogene 1 | -1.32 |
| PLSCR4       | phospholipid scramblase 4                                                | -1.32 |
| PXMP2        | peroxisomal membrane protein 2                                           | -1.32 |
| S1PR3        | sphingosine-1-phosphate receptor 3                                       | -1.32 |
| SORBS2       | sorbin and SH3 domain containing 2                                       | -1.32 |
| STOM         | stomatin                                                                 | -1.32 |
| TGFBR3       | transforming growth factor beta receptor 3                               | -1.32 |
| EDA          | ectodysplasin A                                                          | -1.33 |
| FILIP1L      | filamin A interacting protein 1 like                                     | -1.33 |
| IVD          | isovaleryl-CoA dehydrogenase                                             | -1.33 |
| LOC105371267 | p53-regulated lncRNA 1                                                   | -1.33 |
| PINX1        | PIN2 (TERF1) interacting telomerase inhibitor 1                          | -1.33 |
| THSD4        | thrombospondin type 1 domain containing 4                                | -1.33 |
| AKR7L        | aldo-keto reductase family 7 like (gene/pseudogene)                      | -1.34 |
| ARL4D        | ADP ribosylation factor like GTPase 4D                                   | -1.34 |
| CCL4         | C-C motif chemokine ligand 4                                             | -1.34 |
| GADD45A      | growth arrest and DNA damage inducible alpha                             | -1.34 |
| GLUD1        | glutamate dehydrogenase 1                                                | -1.34 |
| LONP2        | lon peptidase 2, peroxisomal                                             | -1.34 |
| MTARC1       | mitochondrial amidoxime reducing component 1                             | -1.34 |
| RAMP3        | receptor activity modifying protein 3                                    | -1.34 |
| SEC14L4      | SEC14 like lipid binding 4                                               | -1.34 |
| SPRYD4       | SPRY domain containing 4                                                 | -1.34 |
| UGP2         | UDP-glucose pyrophosphorylase 2                                          | -1.34 |
| AMBP         | alpha-1-microglobulin/bikunin precursor                                  | -1.35 |
| CD4          | CD4 molecule                                                             | -1.35 |
| CYB5A        | cytochrome b5 type A                                                     | -1.35 |
| DAPK1        | death associated protein kinase 1                                        | -1.35 |

|              |                                                            |       |
|--------------|------------------------------------------------------------|-------|
| DOCK8        | dedicator of cytokinesis 8                                 | -1.35 |
| EPAS1        | endothelial PAS domain protein 1                           | -1.35 |
| FAM107A      | family with sequence similarity 107 member A               | -1.35 |
| PGM5         | phosphoglucomutase 5                                       | -1.35 |
| SCP2         | sterol carrier protein 2                                   | -1.35 |
| SNED1        | sushi, nidogen and EGF like domains 1                      | -1.35 |
| DHRS1        | dehydrogenase/reductase 1                                  | -1.36 |
| F3           | coagulation factor III, tissue factor                      | -1.36 |
| MGLL         | monoglyceride lipase                                       | -1.36 |
| PDCD1LG2     | programmed cell death 1 ligand 2                           | -1.36 |
| STX11        | syntaxin 11                                                | -1.36 |
| CCL3         | C-C motif chemokine ligand 3                               | -1.37 |
| CYGB         | cytoglobin                                                 | -1.37 |
| GABARAPL1    | GABA type A receptor associated protein like 1             | -1.37 |
| GJB2         | gap junction protein beta 2                                | -1.37 |
| GLIS3        | GLIS family zinc finger 3                                  | -1.37 |
| NR112        | nuclear receptor subfamily 1 group I member 2              | -1.37 |
| PLIN4        | perilipin 4                                                | -1.37 |
| PTGER2       | prostaglandin E receptor 2                                 | -1.37 |
| PTP4A1       | protein tyrosine phosphatase 4A1                           | -1.37 |
| SERTAD1      | SERTA domain containing 1                                  | -1.37 |
| TDRP         | testis development related protein                         | -1.37 |
| USH2A        | usherin                                                    | -1.37 |
| AC1156172    |                                                            | -1.38 |
| ACADS        | acyl-CoA dehydrogenase short chain                         | -1.38 |
| CPB2         | carboxypeptidase B2                                        | -1.38 |
| EHHADH       | enoyl-CoA hydratase and 3-hydroxyacyl CoA dehydrogenase    | -1.38 |
| EVA1A        | eva-1 homolog A, regulator of programmed cell death        | -1.38 |
| HSH2D        | hematopoietic SH2 domain containing                        | -1.38 |
| LARP1B       | La ribonucleoprotein 1B                                    | -1.38 |
| LY9          | lymphocyte antigen 9                                       | -1.38 |
| NCKAP5       | NCK associated protein 5                                   | -1.38 |
| PDLIM5       | PDZ and LIM domain 5                                       | -1.38 |
| PROC         | protein C, inactivator of coagulation factors Va and VIIIa | -1.38 |
| RNASE4       | ribonuclease A family member 4                             | -1.38 |
| RP11_437L71  |                                                            | -1.38 |
| RP11_463O125 |                                                            | -1.38 |
| SORD         | sorbitol dehydrogenase                                     | -1.38 |
| TMEM86B      | transmembrane protein 86B                                  | -1.38 |
| TPBG         | trophoblast glycoprotein                                   | -1.38 |
| ANKRD24      | ankyrin repeat domain 24                                   | -1.39 |
| CLDN14       | claudin 14                                                 | -1.39 |
| CTD_2373N43  |                                                            | -1.39 |
| DHTKD1       | dehydrogenase E1 and transketolase domain containing 1     | -1.39 |
| FAM160A1     | family with sequence similarity 160 member A1              | -1.39 |
| FERMT2       | fermitin family member 2                                   | -1.39 |
| JUN          | Jun proto-oncogene, AP-1 transcription factor subunit      | -1.39 |
| JUNB         | JunB proto-oncogene, AP-1 transcription factor subunit     | -1.39 |
| MBNL2        | muscleblind like splicing regulator 2                      | -1.39 |
| MST1L        | macrophage stimulating 1 like                              | -1.39 |
| MYCT1        | MYC target 1                                               | -1.39 |
| PNPLA3       | patatin like phospholipase domain containing 3             | -1.39 |
| RASSF9       | Ras association domain family member 9                     | -1.39 |
| SMAD6        | SMAD family member 6                                       | -1.39 |
| AL358113.1   |                                                            | -1.4  |
| DLL1         | delta like canonical Notch ligand 1                        | -1.4  |
| ENTPD8       | ectonucleoside triphosphate diphosphohydrolase 8           | -1.4  |

|              |                                                            |       |
|--------------|------------------------------------------------------------|-------|
| F8           | coagulation factor VIII                                    | -1.4  |
| GFOD1        | glucose-fructose oxidoreductase domain containing 1        | -1.4  |
| GOT2         | glutamic-oxaloacetic transaminase 2                        | -1.4  |
| HDC          | histidine decarboxylase                                    | -1.4  |
| KLRB1        | killer cell lectin like receptor B1                        | -1.4  |
| RP11_250B26  |                                                            | -1.4  |
| SLAMF6       | SLAM family member 6                                       | -1.4  |
| TNK2-AS1     | TNK2 antisense RNA 1                                       | -1.4  |
| ZNF638-IT1   |                                                            | -1.4  |
| ARMCX3       | armadillo repeat containing X-linked 3                     | -1.41 |
| ASL          | argininosuccinate lyase                                    | -1.41 |
| AVPI1        | arginine vasopressin induced 1                             | -1.41 |
| CDHR1        | cadherin related family member 1                           | -1.41 |
| EPOR         | erythropoietin receptor                                    | -1.41 |
| IRF8         | interferon regulatory factor 8                             | -1.41 |
| MMAA         | metabolism of cobalamin associated A                       | -1.41 |
| PCAT19       | prostate cancer associated transcript 19                   | -1.41 |
| PCDHGB7      | protocadherin gamma subfamily B, 7                         | -1.41 |
| SERPINA6     | serpin family A member 6                                   | -1.41 |
| SLC34A1      | solute carrier family 34 member 1                          | -1.41 |
| SLC41A2      | solute carrier family 41 member 2                          | -1.41 |
| ABCA6        | ATP binding cassette subfamily A member 6                  | -1.42 |
| ABCG5        | ATP binding cassette subfamily G member 5                  | -1.42 |
| CTD_3203P23  |                                                            | -1.42 |
| ERLIN1       | ER lipid raft associated 1                                 | -1.42 |
| LHX2         | LIM homeobox 2                                             | -1.42 |
| MAMDC4       | MAM domain containing 4                                    | -1.42 |
| NSUN6        | NOP2/Sun RNA methyltransferase 6                           | -1.42 |
| PTPRD        | protein tyrosine phosphatase receptor type D               | -1.42 |
| RP3_414A1512 |                                                            | -1.42 |
| TKFC         | triokinase and FMN cyclase                                 | -1.42 |
| ZC2HC1C      | zinc finger C2HC-type containing 1C                        | -1.42 |
| C17orf107    | chromosome 17 open reading frame 107                       | -1.43 |
| CAT          | catalase                                                   | -1.43 |
| CCN1         | cellular communication network factor 1                    | -1.43 |
| CDC37L1      | cell division cycle 37 like 1                              | -1.43 |
| CTD_2114J121 |                                                            | -1.43 |
| HK3          | hexokinase 3                                               | -1.43 |
| IPCEF1       | interaction protein for cytohesin exchange factors 1       | -1.43 |
| TCHH         | trichohyalin                                               | -1.43 |
| ABLIM3       | actin binding LIM protein family member 3                  | -1.44 |
| ACAD11       | acyl-CoA dehydrogenase family member 11                    | -1.44 |
| C5           | complement C5                                              | -1.44 |
| CDC42BPG     | CDC42 binding protein kinase gamma                         | -1.44 |
| CDH23        | cadherin related 23                                        | -1.44 |
| CYTIP        | cytohesin 1 interacting protein                            | -1.44 |
| DMD          | dystrophin                                                 | -1.44 |
| FXN          | frataxin                                                   | -1.44 |
| NDUFA6-DT    | NDUFA6 divergent transcript                                | -1.44 |
| P2RY10       | P2Y receptor family member 10                              | -1.44 |
| PCOLCE       | procollagen C-endopeptidase enhancer                       | -1.44 |
| PRKAG2       | protein kinase AMP-activated non-catalytic subunit gamma 2 | -1.44 |
| RP5_849H193  |                                                            | -1.44 |
| THBD         | thrombomodulin                                             | -1.44 |
| TNFRSF10C    | TNF receptor superfamily member 10c                        | -1.44 |
| ZDHHC11B     | zinc finger DHHC-type containing 11B                       | -1.44 |
| ALDH5A1      | aldehyde dehydrogenase 5 family member A1                  | -1.45 |

|             |                                                              |       |
|-------------|--------------------------------------------------------------|-------|
| ATP7B       | ATPase copper transporting beta                              | -1.45 |
| BCKDHB      | branched chain keto acid dehydrogenase E1 subunit beta       | -1.45 |
| C11orf54    | chromosome 11 open reading frame 54                          | -1.45 |
| CD14        | CD14 molecule                                                | -1.45 |
| DUSP10      | dual specificity phosphatase 10                              | -1.45 |
| IFNLR1      | interferon lambda receptor 1                                 | -1.45 |
| KCNJ8       | potassium inwardly rectifying channel subfamily J member 8   | -1.45 |
| KLHL3       | kelch like family member 3                                   | -1.45 |
| PPP1R16B    | protein phosphatase 1 regulatory subunit 16B                 | -1.45 |
| SDC4        | syndecan 4                                                   | -1.45 |
| SERPINA10   | serpin family A member 10                                    | -1.45 |
| SLC4A4      | solute carrier family 4 member 4                             | -1.45 |
| TMEM220-AS1 | TMEM220 antisense RNA 1                                      | -1.45 |
| TMEM45A     | transmembrane protein 45A                                    | -1.45 |
| TSPOAP1     | TSPO associated protein 1                                    | -1.45 |
| USP2        | ubiquitin specific peptidase 2                               | -1.45 |
| AUTS2       | activator of transcription and developmental regulator AUTS2 | -1.46 |
| ITIH1       | inter-alpha-trypsin inhibitor heavy chain 1                  | -1.46 |
| LONRF3      | LON peptidase N-terminal domain and ring finger 3            | -1.46 |
| TNIK        | TRAF2 and NCK interacting kinase                             | -1.46 |
| YPEL2       | yippee like 2                                                | -1.46 |
| ADAP1       | ArfGAP with dual PH domains 1                                | -1.47 |
| C16orf96    | chromosome 16 open reading frame 96                          | -1.47 |
| C5AR1       | complement C5a receptor 1                                    | -1.47 |
| CP          | ceruloplasmin                                                | -1.47 |
| FAM13A      | family with sequence similarity 13 member A                  | -1.47 |
| FNIP2       | folliculin interacting protein 2                             | -1.47 |
| GP1BA       | glycoprotein Ib platelet subunit alpha                       | -1.47 |
| LGI4        | leucine rich repeat LGI family member 4                      | -1.47 |
| PPP2R1B     | protein phosphatase 2 scaffold subunit Abeta                 | -1.47 |
| SERPINB8    | serpin family B member 8                                     | -1.47 |
| SLC18A2     | solute carrier family 18 member A2                           | -1.47 |
| DAB1        | DAB adaptor protein 1                                        | -1.48 |
| GATM        | glycine amidinotransferase                                   | -1.48 |
| MST1P2      | macrophage stimulating 1 pseudogene 2                        | -1.48 |
| PEX11G      | peroxisomal biogenesis factor 11 gamma                       | -1.48 |
| PIK3R1      | phosphoinositide-3-kinase regulatory subunit 1               | -1.48 |
| PRRG4       | proline rich and Gla domain 4                                | -1.48 |
| SC5D        | sterol-C5-desaturase                                         | -1.48 |
| SGMS2       | sphingomyelin synthase 2                                     | -1.48 |
| AC00401913  |                                                              | -1.49 |
| AC007262.2  |                                                              | -1.49 |
| AXL         | AXL receptor tyrosine kinase                                 | -1.49 |
| BANK1       | B cell scaffold protein with ankyrin repeats 1               | -1.49 |
| BTBD16      | BTB domain containing 16                                     | -1.49 |
| C2orf88     | chromosome 2 open reading frame 88                           | -1.49 |
| DLEC1       | DLEC1 cilia and flagella associated protein                  | -1.49 |
| GBP1        | guanylate binding protein 1                                  | -1.49 |
| HMOX1       | heme oxygenase 1                                             | -1.49 |
| MIR29B2CHG  | MIR29B2 and MIR29C host gene                                 | -1.49 |
| MROH8       | maestro heat like repeat family member 8                     | -1.49 |
| PXDC1       | PX domain containing 1                                       | -1.49 |
| SLC14A1     | solute carrier family 14 member 1 (Kidd blood group)         | -1.49 |
| SORL1       | sortilin related receptor 1                                  | -1.49 |
| VMO1        | vitelline membrane outer layer 1 homolog                     | -1.49 |
| APOM        | apolipoprotein M                                             | -1.5  |
| ARHGEF26    | Rho guanine nucleotide exchange factor 26                    | -1.5  |

|              |                                                          |       |
|--------------|----------------------------------------------------------|-------|
| CAVIN2       | caveolae associated protein 2                            | -1.5  |
| DCXR         | dicarbonyl and L-xylulose reductase                      | -1.5  |
| DNALI1       | dynein axonemal light intermediate chain 1               | -1.5  |
| GPRASP1      | G protein-coupled receptor associated sorting protein 1  | -1.5  |
| KDM6B        | lysine demethylase 6B                                    | -1.5  |
| MEFV         | MEFV innate immunity regulator, pyrin                    | -1.5  |
| PELI2        | pellino E3 ubiquitin protein ligase family member 2      | -1.5  |
| PTPRB        | protein tyrosine phosphatase receptor type B             | -1.5  |
| SLC9B2       | solute carrier family 9 member B2                        | -1.5  |
| SMAD9        | SMAD family member 9                                     | -1.5  |
| ZNF667       | zinc finger protein 667                                  | -1.5  |
| ARSD-AS1     | ARSD antisense RNA 1                                     | -1.51 |
| CBR4         | carbonyl reductase 4                                     | -1.51 |
| CHST7        | carbohydrate sulfotransferase 7                          | -1.51 |
| DHODH        | dihydroorotate dehydrogenase (quinone)                   | -1.51 |
| GATA6        | GATA binding protein 6                                   | -1.51 |
| GRAMD4       | GRAM domain containing 4                                 | -1.51 |
| LTBP4        | latent transforming growth factor beta binding protein 4 | -1.51 |
| MIDEAS       | mitotic deacetylase associated SANT domain protein       | -1.51 |
| MYO7A        | myosin VIIA                                              | -1.51 |
| PRF1         | perforin 1                                               | -1.51 |
| PROSER2-AS1  | PROSER2 antisense RNA 1                                  | -1.51 |
| S100A14      | S100 calcium binding protein A14                         | -1.51 |
| SCD5         | stearoyl-CoA desaturase 5                                | -1.51 |
| SLC16A4      | solute carrier family 16 member 4                        | -1.51 |
| WFDC1        | WAP four-disulfide core domain 1                         | -1.51 |
| ABHD2        | abhydrolase domain containing 2, acylglycerol lipase     | -1.52 |
| ACAT1        | acetyl-CoA acetyltransferase 1                           | -1.52 |
| CREB3L3      | cAMP responsive element binding protein 3 like 3         | -1.52 |
| GPHN         | gephyrin                                                 | -1.52 |
| GRHL1        | grainyhead like transcription factor 1                   | -1.52 |
| ITIH2        | inter-alpha-trypsin inhibitor heavy chain 2              | -1.52 |
| PCP4L1       | Purkinje cell protein 4 like 1                           | -1.52 |
| SKAP1        | src kinase associated phosphoprotein 1                   | -1.52 |
| SLC16A5      | solute carrier family 16 member 5                        | -1.52 |
| THEMIS       | thymocyte selection associated                           | -1.52 |
| ZNF334       | zinc finger protein 334                                  | -1.52 |
| CA3          | carbonic anhydrase 3                                     | -1.53 |
| GC           | GC vitamin D binding protein                             | -1.53 |
| ORM1         | orosomucoid 1                                            | -1.53 |
| RIPK4        | receptor interacting serine/threonine kinase 4           | -1.53 |
| SSTR2        | somatostatin receptor 2                                  | -1.53 |
| TRGC2        | T cell receptor gamma constant 2                         | -1.53 |
| ABCC9        | ATP binding cassette subfamily C member 9                | -1.54 |
| ADAMTS9-AS2  | ADAMTS9 antisense RNA 2                                  | -1.54 |
| LAX1         | lymphocyte transmembrane adaptor 1                       | -1.54 |
| PTK6         | protein tyrosine kinase 6                                | -1.54 |
| RGS4         | regulator of G protein signaling 4                       | -1.54 |
| SLC39A14     | solute carrier family 39 member 14                       | -1.54 |
| SORBS1       | sorbin and SH3 domain containing 1                       | -1.54 |
| MCTP2        | multiple C2 and transmembrane domain containing 2        | -1.55 |
| MST1         | macrophage stimulating 1                                 | -1.55 |
| PBX1         | PBX homeobox 1                                           | -1.55 |
| PHYH         | phytanoyl-CoA 2-hydroxylase                              | -1.55 |
| RP11_449P151 |                                                          | -1.55 |
| SMOC1        | SPARC related modular calcium binding 1                  | -1.55 |
| TIAM1        | TIAM Rac1 associated GEF 1                               | -1.55 |



|              |                                                                                                 |       |
|--------------|-------------------------------------------------------------------------------------------------|-------|
| ADGRA3       | adhesion G protein-coupled receptor A3                                                          | -1.56 |
| ALAS1        | 5'-aminolevulinate synthase 1                                                                   | -1.56 |
| GLTPD2       | glycolipid transfer protein domain containing 2                                                 | -1.56 |
| GNPNAT1      | glucosamine-phosphate N-acetyltransferase 1                                                     | -1.56 |
| MRPL23-AS1   | MRPL23 antisense RNA 1                                                                          | -1.56 |
| MYO15A       | myosin XVA                                                                                      | -1.56 |
| RP11-986E7.7 |                                                                                                 | -1.56 |
| SRD5A1       | steroid 5 alpha-reductase 1                                                                     | -1.56 |
| TRIB1        | tribbles pseudokinase 1                                                                         | -1.56 |
| ADGRG6       | adhesion G protein-coupled receptor G6                                                          | -1.57 |
| CCL15-CCL14  | CCL15-CCL14 readthrough (NMD candidate)                                                         | -1.57 |
| CPAMD8       | C3 and PZP like alpha-2-macroglobulin domain containing 8                                       | -1.57 |
| CTB_50L1714  |                                                                                                 | -1.57 |
| CYP2J2       | cytochrome P450 family 2 subfamily J member 2                                                   | -1.57 |
| SLC38A2      | solute carrier family 38 member 2                                                               | -1.57 |
| SOWAHB       | sosondawah ankyrin repeat domain family member B                                                | -1.57 |
| SPIRE1       | spire type actin nucleation factor 1                                                            | -1.57 |
| CCDC71L      | coiled-coil domain containing 71 like                                                           | -1.58 |
| CD160        | CD160 molecule                                                                                  | -1.58 |
| DUSP2        | dual specificity phosphatase 2                                                                  | -1.58 |
| EVC2         | EvC ciliary complex subunit 2                                                                   | -1.58 |
| HAO1         | hydroxyacid oxidase 1                                                                           | -1.58 |
| LPIN2        | lipin 2                                                                                         | -1.58 |
| MEIS3P1      | Meis homeobox 3 pseudogene 1                                                                    | -1.58 |
| SLC17A2      | solute carrier family 17 member 2                                                               | -1.58 |
| SLC19A3      | solute carrier family 19 member 3                                                               | -1.58 |
| STAT4        | signal transducer and activator of transcription 4                                              | -1.58 |
| APLNR        | apelin receptor                                                                                 | -1.59 |
| AR           | androgen receptor                                                                               | -1.59 |
| C3           | complement C3                                                                                   | -1.59 |
| GALNT16      | polypeptide N-acetylgalactosaminyltransferase 16                                                | -1.59 |
| GENE         | glucosamine (UDP-N-acetyl)-2-epimerase/N-acetylmannosamine kinase                               | -1.59 |
| MMUT         | methylmalonyl-CoA mutase                                                                        | -1.59 |
| ZFPM2        | zinc finger protein, FOG family member 2                                                        | -1.59 |
| ACMSD        | aminocarboxymuconate semialdehyde decarboxylase                                                 | -1.6  |
| ACOX1        | acyl-CoA oxidase 1                                                                              | -1.6  |
| ATRNL1       | attractin like 1                                                                                | -1.6  |
| BACH2        | BTB domain and CNC homolog 2                                                                    | -1.6  |
| CD226        | CD226 molecule                                                                                  | -1.6  |
| CDNF         | cerebral dopamine neurotrophic factor                                                           | -1.6  |
| KLF11        | Kruppel like factor 11                                                                          | -1.6  |
| KLF6         | Kruppel like factor 6                                                                           | -1.6  |
| FGL2         | fibrinogen like 2                                                                               | -1.61 |
| IDNK         | IDNK gluconokinase                                                                              | -1.61 |
| PSD3         | pleckstrin and Sec7 domain containing 3                                                         | -1.61 |
| ZDBF2        | zinc finger DBF-type containing 2                                                               | -1.61 |
| CTC_250I146  |                                                                                                 | -1.62 |
| EPS8L1       | EPS8 like 1                                                                                     | -1.62 |
| FMO5         | flavin containing dimethylaniline monooxygenase 5                                               | -1.62 |
| GSTZ1        | glutathione S-transferase zeta 1                                                                | -1.62 |
| IL2RB        | interleukin 2 receptor subunit beta                                                             | -1.62 |
| MPC1         | mitochondrial pyruvate carrier 1                                                                | -1.62 |
| MTHFD1       | methylenetetrahydrofolate dehydrogenase, cyclohydrolase and formyltetrahydrofolate synthetase 1 | -1.62 |
| ORM2         | orosomucoid 2                                                                                   | -1.62 |
| RCL1         | RNA terminal phosphate cyclase like 1                                                           | -1.62 |
| SLC24A3      | solute carrier family 24 member 3                                                               | -1.62 |

|              |                                                                          |       |
|--------------|--------------------------------------------------------------------------|-------|
| STEAP3-AS1   | STEAP3 antisense RNA 1                                                   | -1.62 |
| TMEM154      | transmembrane protein 154                                                | -1.62 |
| CD69         | CD69 molecule                                                            | -1.63 |
| CTD_2619J138 |                                                                          | -1.63 |
| ESRP2        | epithelial splicing regulatory protein 2                                 | -1.63 |
| F13B         | coagulation factor XIII B chain                                          | -1.63 |
| GPR180       | G protein-coupled receptor 180                                           | -1.63 |
| LAG3         | lymphocyte activating 3                                                  | -1.63 |
| LINC02637    | long intergenic non-protein coding RNA 2637                              | -1.63 |
| NAV2         | neuron navigator 2                                                       | -1.63 |
| NR4A1        | nuclear receptor subfamily 4 group A member 1                            | -1.63 |
| RP5_875O137  |                                                                          | -1.63 |
| SPTBN2       | spectrin beta, non-erythrocytic 2                                        | -1.63 |
| ZBTB21       | zinc finger and BTB domain containing 21                                 | -1.63 |
| BX8425682    |                                                                          | -1.64 |
| C1R          | complement C1r                                                           | -1.64 |
| GPAT3        | glycerol-3-phosphate acyltransferase 3                                   | -1.64 |
| RASL11B      | RAS like family 11 member B                                              | -1.64 |
| SLAIN1       | SLAIN motif family member 1                                              | -1.64 |
| SPNS2        | sphingolipid transporter 2                                               | -1.64 |
| ACOX2        | acyl-CoA oxidase 2                                                       | -1.65 |
| NAALADL2     | N-acetylated alpha-linked acidic dipeptidase like 2                      | -1.65 |
| NFIL3        | nuclear factor, interleukin 3 regulated                                  | -1.65 |
| PALM3        | paralemmin 3                                                             | -1.65 |
| SH3YL1       | SH3 and SYLF domain containing 1                                         | -1.65 |
| TLL1         | tolloid like 1                                                           | -1.65 |
| DACT1        | dishevelled binding antagonist of beta catenin 1                         | -1.66 |
| PHGDH        | phosphoglycerate dehydrogenase                                           | -1.66 |
| RP11-606E8.2 |                                                                          | -1.66 |
| SLAMF7       | SLAM family member 7                                                     | -1.66 |
| SLC23A2      | solute carrier family 23 member 2                                        | -1.66 |
| SLC25A25     | solute carrier family 25 member 25                                       | -1.66 |
| TTYH1        | tweety family member 1                                                   | -1.66 |
| ABCA10       | ATP binding cassette subfamily A member 10                               | -1.67 |
| ATP1B2       | ATPase Na <sup>+</sup> /K <sup>+</sup> transporting subunit beta 2       | -1.67 |
| HSPB6        | heat shock protein family B (small) member 6                             | -1.67 |
| PIK3C2G      | phosphatidylinositol-4-phosphate 3-kinase catalytic subunit type 2 gamma | -1.67 |
| PRSS53       | serine protease 53                                                       | -1.67 |
| SCNN1A       | sodium channel epithelial 1 subunit alpha                                | -1.67 |
| TUBE1        | tubulin epsilon 1                                                        | -1.67 |
| ZNF667-AS1   | ZNF667 antisense RNA 1 (head to head)                                    | -1.67 |
| FAM149A      | family with sequence similarity 149 member A                             | -1.68 |
| ID4          | inhibitor of DNA binding 4, HLH protein                                  | -1.68 |
| TNXB         | tenascin XB                                                              | -1.68 |
| ACAA1        | acetyl-CoA acyltransferase 1                                             | -1.69 |
| CYP3A5       | cytochrome P450 family 3 subfamily A member 5                            | -1.69 |
| EPHA2        | EPH receptor A2                                                          | -1.69 |
| IL18RAP      | interleukin 18 receptor accessory protein                                | -1.69 |
| KCNE1        | potassium voltage-gated channel subfamily E regulatory subunit 1         | -1.69 |
| NAV2-AS1     | NAV2 antisense RNA 1                                                     | -1.69 |
| PFKFB3       | 6-phosphofructo-2-kinase/fructose-2,6-biphosphatase 3                    | -1.69 |
| AGTR1        | angiotensin II receptor type 1                                           | -1.7  |
| BGN          | biglycan                                                                 | -1.7  |
| CCDC3        | coiled-coil domain containing 3                                          | -1.7  |
| IGSF9        | immunoglobulin superfamily member 9                                      | -1.7  |
| PCSK6        | proprotein convertase subtilisin/kexin type 6                            | -1.7  |
| TGFA         | transforming growth factor alpha                                         | -1.7  |

|              |                                                               |       |
|--------------|---------------------------------------------------------------|-------|
| ZNF385B      | zinc finger protein 385B                                      | -1.7  |
| KCNJ15       | potassium inwardly rectifying channel subfamily J member 15   | -1.71 |
| NAAA         | N-acylethanolamine acid amidase                               | -1.71 |
| PBLD         | phenazine biosynthesis like protein domain containing         | -1.71 |
| PRUNE2       | prune homolog 2 with BCH domain                               | -1.71 |
| CFAP251      | cilia and flagella associated protein 251                     | -1.72 |
| RDH5         | retinol dehydrogenase 5                                       | -1.72 |
| RP11_872D178 |                                                               | -1.72 |
| SLC1A1       | solute carrier family 1 member 1                              | -1.72 |
| VTN          | vitronectin                                                   | -1.72 |
| ATF3         | activating transcription factor 3                             | -1.73 |
| CFD          | complement factor D                                           | -1.73 |
| CISH         | cytokine inducible SH2 containing protein                     | -1.73 |
| DUSP5        | dual specificity phosphatase 5                                | -1.73 |
| EDNRB        | endothelin receptor type B                                    | -1.73 |
| EGR3         | early growth response 3                                       | -1.73 |
| EXOC3L4      | exocyst complex component 3 like 4                            | -1.73 |
| FCMR         | Fc fragment of IgM receptor                                   | -1.73 |
| GPT          | glutamic--pyruvic transaminase                                | -1.73 |
| HS3ST3A1     | heparan sulfate-glucosamine 3-sulfotransferase 3A1            | -1.73 |
| PRKAR2B      | protein kinase cAMP-dependent type II regulatory subunit beta | -1.73 |
| SH2D1B       | SH2 domain containing 1B                                      | -1.73 |
| SOCS3        | suppressor of cytokine signaling 3                            | -1.73 |
| ACAA2        | acetyl-CoA acyltransferase 2                                  | -1.74 |
| CST7         | cystatin F                                                    | -1.74 |
| GK           | glycerol kinase                                               | -1.74 |
| ITK          | IL2 inducible T cell kinase                                   | -1.74 |
| LILRA2       | leukocyte immunoglobulin like receptor A2                     | -1.74 |
| NAPSB        | napsin B aspartic peptidase, pseudogene                       | -1.74 |
| SYTL3        | synaptotagmin like 3                                          | -1.74 |
| ABCA9        | ATP binding cassette subfamily A member 9                     | -1.75 |
| GBP7         | guanylate binding protein 7                                   | -1.75 |
| GOT1         | glutamic-oxaloacetic transaminase 1                           | -1.75 |
| KLHL15       | kelch like family member 15                                   | -1.75 |
| NDRG2        | NDRG family member 2                                          | -1.75 |
| PEMT         | phosphatidylethanolamine N-methyltransferase                  | -1.75 |
| PLEKHB1      | pleckstrin homology domain containing B1                      | -1.75 |
| RGS7BP       | regulator of G protein signaling 7 binding protein            | -1.75 |
| SEMA6D       | semaphorin 6D                                                 | -1.75 |
| TMPRSS2      | transmembrane serine protease 2                               | -1.75 |
| VNN3         | vanin 3                                                       | -1.75 |
| ACACB        | acetyl-CoA carboxylase beta                                   | -1.76 |
| FITM1        | fat storage inducing transmembrane protein 1                  | -1.76 |
| GZMK         | granzyme K                                                    | -1.76 |
| PTPRS        | protein tyrosine phosphatase receptor type S                  | -1.76 |
| RP11-284N8.3 |                                                               | -1.76 |
| RP11_93B149  |                                                               | -1.76 |
| SCIMP        | SLP adaptor and CSK interacting membrane protein              | -1.76 |
| SDCBP2       | syndecan binding protein 2                                    | -1.76 |
| TMIGD3       | transmembrane and immunoglobulin domain containing 3          | -1.76 |
| ZFP36        | ZFP36 ring finger protein                                     | -1.76 |
| CYP4F12      | cytochrome P450 family 4 subfamily F member 12                | -1.77 |
| FLRT3        | fibronectin leucine rich transmembrane protein 3              | -1.77 |
| TEK          | TEK receptor tyrosine kinase                                  | -1.77 |
| TGFB3        | transforming growth factor beta 3                             | -1.77 |
| VWCE         | von Willebrand factor C and EGF domains                       | -1.77 |
| ABAT         | 4-aminobutyrate aminotransferase                              | -1.78 |

|               |                                                    |       |
|---------------|----------------------------------------------------|-------|
| BMP6          | bone morphogenetic protein 6                       | -1.78 |
| BMX           | BMX non-receptor tyrosine kinase                   | -1.78 |
| CBS/CBSL      | cystathionine beta-synthase                        | -1.78 |
| CD1D          | CD1d molecule                                      | -1.78 |
| MACC1         | MET transcriptional regulator MACC1                | -1.78 |
| FCRLA         | Fc receptor like A                                 | -1.79 |
| GCDH          | glutaryl-CoA dehydrogenase                         | -1.79 |
| GPR171        | G protein-coupled receptor 171                     | -1.79 |
| RP11-235E17.2 |                                                    | -1.79 |
| ADH6          | alcohol dehydrogenase 6 (class V)                  | -1.8  |
| ART4          | ADP-ribosyltransferase 4 (Dombrock blood group)    | -1.8  |
| CA14          | carbonic anhydrase 14                              | -1.8  |
| CLEC12A       | C-type lectin domain family 12 member A            | -1.8  |
| CTD_2033D152  |                                                    | -1.8  |
| DEPDC7        | DEP domain containing 7                            | -1.8  |
| FGG           | fibrinogen gamma chain                             | -1.8  |
| MAN1C1        | mannosidase alpha class 1C member 1                | -1.8  |
| NALCN         | sodium leak channel, non-selective                 | -1.8  |
| RASGEF1B      | RasGEF domain family member 1B                     | -1.8  |
| TENT5C        | terminal nucleotidyltransferase 5C                 | -1.8  |
| EOMES         | eomesodermin                                       | -1.81 |
| GAREM1        | GRB2 associated regulator of MAPK1 subtype 1       | -1.81 |
| GK-AS1        | GK antisense RNA 1                                 | -1.81 |
| PCDH9         | protocadherin 9                                    | -1.81 |
| PEG3          | paternally expressed 3                             | -1.81 |
| PTPN13        | protein tyrosine phosphatase non-receptor type 13  | -1.81 |
| RIDA          | reactive intermediate imine deaminase A homolog    | -1.81 |
| SLC25A18      | solute carrier family 25 member 18                 | -1.81 |
| AC00507714    |                                                    | -1.82 |
| ADAMTSL3      | ADAMTS like 3                                      | -1.82 |
| GNAO1         | G protein subunit alpha o1                         | -1.82 |
| ITIH4         | inter-alpha-trypsin inhibitor heavy chain 4        | -1.82 |
| MIR122HG      |                                                    | -1.82 |
| RP11_242C192  |                                                    | -1.82 |
| SCN11A        | sodium voltage-gated channel alpha subunit 11      | -1.82 |
| SHROOM2       | shroom family member 2                             | -1.82 |
| FAXDC2        | fatty acid hydroxylase domain containing 2         | -1.83 |
| FCGR2B        | Fc fragment of IgG receptor IIb                    | -1.83 |
| IL33          | interleukin 33                                     | -1.83 |
| NPY5R         | neuropeptide Y receptor Y5                         | -1.83 |
| OLFM1         | olfactomedin 1                                     | -1.83 |
| PCK2          | phosphoenolpyruvate carboxykinase 2, mitochondrial | -1.83 |
| ANG           | angiogenin                                         | -1.84 |
| AQP7          | aquaporin 7                                        | -1.84 |
| CTC_490E2111  |                                                    | -1.84 |
| DSEL          | dermatan sulfate epimerase like                    | -1.84 |
| ESPNP         | espin pseudogene                                   | -1.84 |
| GPD1          | glycerol-3-phosphate dehydrogenase 1               | -1.84 |
| HAAO          | 3-hydroxyanthranilate 3,4-dioxygenase              | -1.84 |
| INMT-MINDY4   | INMT-MINDY4 readthrough (NMD candidate)            | -1.84 |
| MASP2         | mannan binding lectin serine peptidase 2           | -1.84 |
| MCC           | MCC regulator of WNT signaling pathway             | -1.84 |
| ADRA1B        | adrenoceptor alpha 1B                              | -1.85 |
| CD163         | CD163 molecule                                     | -1.85 |
| CTD_2619J135  |                                                    | -1.85 |
| MMP23A        | matrix metalloproteinase 23A (pseudogene)          | -1.85 |
| SPIB          | Spi-B transcription factor                         | -1.85 |

|                   |                                                                 |       |
|-------------------|-----------------------------------------------------------------|-------|
| TLCD4             | TLC domain containing 4                                         | -1.85 |
| ALDH1A3           | aldehyde dehydrogenase 1 family member A3                       | -1.86 |
| ANGPTL3           | angiotensinogen like 3                                          | -1.86 |
| DLG2              | discs large MAGUK scaffold protein 2                            | -1.86 |
| IL1RN             | interleukin 1 receptor antagonist                               | -1.86 |
| LEAP2             | liver enriched antimicrobial peptide 2                          | -1.86 |
| RHOB              | ras homolog family member B                                     | -1.86 |
| SORCS2            | sortilin related VPS10 domain containing receptor 2             | -1.86 |
| ACSM3             | acyl-CoA synthetase medium chain family member 3                | -1.87 |
| CHRNE             | cholinergic receptor nicotinic epsilon subunit                  | -1.87 |
| CPT1A             | carnitine palmitoyltransferase 1A                               | -1.87 |
| CYP2D7            | cytochrome P450 family 2 subfamily D member 7 (gene/pseudogene) | -1.87 |
| LINC02037         | long intergenic non-protein coding RNA 2037                     | -1.87 |
| PRICKLE1          | prickle planar cell polarity protein 1                          | -1.87 |
| PROM2             | prominin 2                                                      | -1.87 |
| RBMS3             | RNA binding motif single stranded interacting protein 3         | -1.87 |
| RP1_232L22_B1     |                                                                 | -1.87 |
| SH2D1A            | SH2 domain containing 1A                                        | -1.87 |
| ADAMTS1           | ADAM metalloproteinase with thrombospondin type 1 motif 1       | -1.88 |
| AKAP12            | A-kinase anchoring protein 12                                   | -1.88 |
| ALDH2             | aldehyde dehydrogenase 2 family member                          | -1.88 |
| ALPL              | alkaline phosphatase, biomineralization associated              | -1.88 |
| CYFIP2            | cytoplasmic FMR1 interacting protein 2                          | -1.88 |
| GTF2IP7           | general transcription factor Iii pseudogene 7                   | -1.88 |
| LILRA1            | leukocyte immunoglobulin like receptor A1                       | -1.88 |
| MIR22HG           | MIR22 host gene                                                 | -1.88 |
| RP11_524F111      |                                                                 | -1.88 |
| ABCB4             | ATP binding cassette subfamily B member 4                       | -1.89 |
| CILP              | cartilage intermediate layer protein                            | -1.89 |
| CYP2D8P           | cytochrome P450 family 2 subfamily D member 8, pseudogene       | -1.89 |
| LIPC              | lipase C, hepatic type                                          | -1.89 |
| PDE2A             | phosphodiesterase 2A                                            | -1.89 |
| PLPP3             | phospholipid phosphatase 3                                      | -1.89 |
| TNN               | tenascin N                                                      | -1.89 |
| CD302             | CD302 molecule                                                  | -1.9  |
| CYP2C19           | cytochrome P450 family 2 subfamily C member 19                  | -1.9  |
| DLC1              | DLC1 Rho GTPase activating protein                              | -1.9  |
| GADD45G           | growth arrest and DNA damage inducible gamma                    | -1.9  |
| PCDH19            | protocadherin 19                                                | -1.9  |
| RND1              | Rho family GTPase 1                                             | -1.9  |
| TRMT9B            | tRNA methyltransferase 9B (putative)                            | -1.9  |
| FAM167A           | family with sequence similarity 167 member A                    | -1.91 |
| LINC00261         | long intergenic non-protein coding RNA 261                      | -1.91 |
| SLC28A1           | solute carrier family 28 member 1                               | -1.91 |
| SLC6A12           | solute carrier family 6 member 12                               | -1.91 |
| ETNPPL            | ethanolamine-phosphate phospho-lyase                            | -1.92 |
| FEZ1              | fasciculation and elongation protein zeta 1                     | -1.92 |
| FYB2              | FYN binding protein 2                                           | -1.92 |
| LOC653513         | phosphodiesterase 4D interacting protein-like                   | -1.92 |
| AOC4P             | amine oxidase copper containing 4, pseudogene                   | -1.93 |
| ID2-AS1           | ID2 antisense RNA 1                                             | -1.93 |
| IGFBP1            | insulin like growth factor binding protein 1                    | -1.93 |
| KLRC4-KLRK1/KLRK1 | killer cell lectin like receptor K1                             | -1.93 |
| RP11_116D21       |                                                                 | -1.93 |
| BCHE              | butyrylcholinesterase                                           | -1.94 |
| CPED1             | cadherin like and PC-esterase domain containing 1               | -1.94 |
| DUSP1             | dual specificity phosphatase 1                                  | -1.94 |

|              |                                                            |       |
|--------------|------------------------------------------------------------|-------|
| GASK1A       | golgi associated kinase 1A                                 | -1.94 |
| HS3ST3B1     | heparan sulfate-glucosamine 3-sulfotransferase 3B1         | -1.94 |
| LOC105375304 | uncharacterized LOC105375304                               | -1.94 |
| PPP1R3B      | protein phosphatase 1 regulatory subunit 3B                | -1.94 |
| RGN          | regucalcin                                                 | -1.94 |
| SPATA6L      | spermatogenesis associated 6 like                          | -1.94 |
| SULT1E1      | sulfotransferase family 1E member 1                        | -1.94 |
| TECTA        | tectorin alpha                                             | -1.94 |
| TMEM220      | transmembrane protein 220                                  | -1.94 |
| ADAMTS9-AS1  | ADAMTS9 antisense RNA 1                                    | -1.95 |
| CCDC38       | coiled-coil domain containing 38                           | -1.96 |
| FAT4         | FAT atypical cadherin 4                                    | -1.96 |
| TNFRSF13C    | TNF receptor superfamily member 13C                        | -1.96 |
| TRAT1        | T cell receptor associated transmembrane adaptor 1         | -1.96 |
| CD38         | CD38 molecule                                              | -1.97 |
| EPB41L4A     | erythrocyte membrane protein band 4.1 like 4A              | -1.97 |
| PHLDA1       | pleckstrin homology like domain family A member 1          | -1.97 |
| RNF150       | ring finger protein 150                                    | -1.97 |
| ZBTB16       | zinc finger and BTB domain containing 16                   | -1.97 |
| ASPN         | asporin                                                    | -1.98 |
| ID2          | inhibitor of DNA binding 2                                 | -1.98 |
| KRT17P4      | keratin 17 pseudogene 4                                    | -1.98 |
| KRT80        | keratin 80                                                 | -1.98 |
| SLCO4A1      | solute carrier organic anion transporter family member 4A1 | -1.98 |
| CAND2        | cullin associated and neddylation dissociated 2 (putative) | -1.99 |
| ENO3         | enolase 3                                                  | -1.99 |
| RBP1         | retinol binding protein 1                                  | -1.99 |
| SAMD5        | sterile alpha motif domain containing 5                    | -1.99 |
| CLTRN        | collectrin, amino acid transport regulator                 | -2    |
| LDLR         | low density lipoprotein receptor                           | -2    |
| LOC101927793 | uncharacterized LOC101927793                               | -2    |
| P2RY12       | purinergic receptor P2Y12                                  | -2    |
| S100A8       | S100 calcium binding protein A8                            | -2    |
| TNFSF11      | TNF superfamily member 11                                  | -2    |
| AASS         | aminoadipate-semialdehyde synthase                         | -2.01 |
| AGXT2        | alanine--glyoxylate aminotransferase 2                     | -2.01 |
| C1orf210     | chromosome 1 open reading frame 210                        | -2.01 |
| DIRAS3       | DIRAS family GTPase 3                                      | -2.01 |
| EXPH5        | exophilin 5                                                | -2.01 |
| IL18R1       | interleukin 18 receptor 1                                  | -2.01 |
| TNFRSF10D    | TNF receptor superfamily member 10d                        | -2.01 |
| IGFBP3       | insulin like growth factor binding protein 3               | -2.02 |
| MAMDC2       | MAM domain containing 2                                    | -2.02 |
| SLCO1B1      | solute carrier organic anion transporter family member 1B1 | -2.02 |
| TMEM200C     | transmembrane protein 200C                                 | -2.02 |
| CD244        | CD244 molecule                                             | -2.03 |
| PRR26        | proline rich 26                                            | -2.03 |
| SIGLEC5      | sialic acid binding Ig like lectin 5                       | -2.03 |
| TBXA2R       | thromboxane A2 receptor                                    | -2.03 |
| AC0053297    |                                                            | -2.04 |
| CD300E       | CD300e molecule                                            | -2.04 |
| COL26A1      | collagen type XXVI alpha 1 chain                           | -2.04 |
| EPB41L4B     | erythrocyte membrane protein band 4.1 like 4B              | -2.04 |
| EPHX2        | epoxide hydrolase 2                                        | -2.04 |
| FBLN5        | fibulin 5                                                  | -2.04 |
| FPR1         | formyl peptide receptor 1                                  | -2.04 |
| NR4A2        | nuclear receptor subfamily 4 group A member 2              | -2.04 |

|               |                                                                  |       |
|---------------|------------------------------------------------------------------|-------|
| SLC16A2       | solute carrier family 16 member 2                                | -2.04 |
| ADIRF         | adipogenesis regulatory factor                                   | -2.05 |
| FLT3          | fms related receptor tyrosine kinase 3                           | -2.05 |
| HBB           | hemoglobin subunit beta                                          | -2.05 |
| LINC01146     | long intergenic non-protein coding RNA 1146                      | -2.05 |
| LINC01702     | long intergenic non-protein coding RNA 1702                      | -2.05 |
| RP11_420153   |                                                                  | -2.05 |
| RP3_453C1214  |                                                                  | -2.05 |
| RP4_669P1019  |                                                                  | -2.05 |
| AL034417.4    |                                                                  | -2.06 |
| ANXA3         | annexin A3                                                       | -2.06 |
| C8A           | complement C8 alpha chain                                        | -2.06 |
| CA5A          | carbonic anhydrase 5A                                            | -2.06 |
| ETFDH         | electron transfer flavoprotein dehydrogenase                     | -2.06 |
| CLEC3B        | C-type lectin domain family 3 member B                           | -2.07 |
| ETS2          | ETS proto-oncogene 2, transcription factor                       | -2.07 |
| KCNA3         | potassium voltage-gated channel subfamily A member 3             | -2.07 |
| RNF125        | ring finger protein 125                                          | -2.07 |
| CCR7          | C-C motif chemokine receptor 7                                   | -2.08 |
| GPR17         | G protein-coupled receptor 17                                    | -2.08 |
| MFAP3L        | microfibril associated protein 3 like                            | -2.08 |
| MIR17HG       | miR-17-92a-1 cluster host gene                                   | -2.08 |
| RP11_400G35   |                                                                  | -2.08 |
| SERPINA5      | serpin family A member 5                                         | -2.08 |
| EPHB1         | EPH receptor B1                                                  | -2.09 |
| GALNT14       | polypeptide N-acetylgalactosaminyltransferase 14                 | -2.09 |
| NAT8          | N-acetyltransferase 8 (putative)                                 | -2.09 |
| USP43         | ubiquitin specific peptidase 43                                  | -2.09 |
| FGB           | fibrinogen beta chain                                            | -2.1  |
| RXFP1         | relaxin family peptide receptor 1                                | -2.1  |
| SERPINF2      | serpin family F member 2                                         | -2.1  |
| CNTN4         | contactin 4                                                      | -2.11 |
| GLDC          | glycine decarboxylase                                            | -2.11 |
| MASP1         | mannan binding lectin serine peptidase 1                         | -2.11 |
| PALM2AKAP2    | PALM2 and AKAP2 fusion                                           | -2.11 |
| RP4-669P10.20 |                                                                  | -2.11 |
| ZNF831        | zinc finger protein 831                                          | -2.11 |
| GPT2          | glutamic--pyruvic transaminase 2                                 | -2.12 |
| KLRD1         | killer cell lectin like receptor D1                              | -2.12 |
| LINC01554     | long intergenic non-protein coding RNA 1554                      | -2.12 |
| LINC02453     | long intergenic non-protein coding RNA 2453                      | -2.12 |
| PRG4          | proteoglycan 4                                                   | -2.12 |
| SAA4          | serum amyloid A4, constitutive                                   | -2.12 |
| TSLP          | thymic stromal lymphopietin                                      | -2.12 |
| ALDH8A1       | aldehyde dehydrogenase 8 family member A1                        | -2.13 |
| C1QTNF7       | C1q and TNF related 7                                            | -2.13 |
| GGT5          | gamma-glutamyltransferase 5                                      | -2.13 |
| IFITM10       | interferon induced transmembrane protein 10                      | -2.13 |
| LRRC4         | leucine rich repeat containing 4                                 | -2.13 |
| LRRC7         | leucine rich repeat containing 7                                 | -2.13 |
| PLIN2         | perilipin 2                                                      | -2.13 |
| RP11_162P232  |                                                                  | -2.13 |
| SMPD3         | sphingomyelin phosphodiesterase 3                                | -2.13 |
| TF            | transferrin                                                      | -2.13 |
| TRPM8         | transient receptor potential cation channel subfamily M member 8 | -2.13 |
| C11orf96      | chromosome 11 open reading frame 96                              | -2.14 |
| FOLH1         | folate hydrolase 1                                               | -2.14 |

|              |                                                                                |       |
|--------------|--------------------------------------------------------------------------------|-------|
| FUT3         | fucosyltransferase 3 (Lewis blood group)                                       | -2.14 |
| RTL5         | retrotransposon Gag like 5                                                     | -2.14 |
| CYP4V2       | cytochrome P450 family 4 subfamily V member 2                                  | -2.15 |
| PDE7B        | phosphodiesterase 7B                                                           | -2.15 |
| WDR72        | WD repeat domain 72                                                            | -2.15 |
| CTC_526N191  |                                                                                | -2.16 |
| RND3         | Rho family GTPase 3                                                            | -2.16 |
| DOCK8-AS1    | DOCK8 antisense RNA 1                                                          | -2.17 |
| ID1          | inhibitor of DNA binding 1, HLH protein                                        | -2.17 |
| ITGA9        | integrin subunit alpha 9                                                       | -2.17 |
| MYO10        | myosin X                                                                       | -2.17 |
| NLRP14       | NLR family pyrin domain containing 14                                          | -2.17 |
| PAIP2B       | poly(A) binding protein interacting protein 2B                                 | -2.17 |
| PTGS2        | prostaglandin-endoperoxide synthase 2                                          | -2.17 |
| RCAN1        | regulator of calcineurin 1                                                     | -2.17 |
| ANO1         | anoctamin 1                                                                    | -2.18 |
| EFNB3        | ephrin B3                                                                      | -2.18 |
| GDF6         | growth differentiation factor 6                                                | -2.18 |
| HSD17B6      | hydroxysteroid 17-beta dehydrogenase 6                                         | -2.18 |
| LGR6         | leucine rich repeat containing G protein-coupled receptor 6                    | -2.18 |
| MAB21L2      | mab-21 like 2                                                                  | -2.18 |
| RP4_564F226  |                                                                                | -2.18 |
| ACADL        | acyl-CoA dehydrogenase long chain                                              | -2.19 |
| CPEB3        | cytoplasmic polyadenylation element binding protein 3                          | -2.19 |
| HOGA1        | 4-hydroxy-2-oxoglutarate aldolase 1                                            | -2.19 |
| KCND3        | potassium voltage-gated channel subfamily D member 3                           | -2.19 |
| SLC2A9       | solute carrier family 2 member 9                                               | -2.19 |
| FAM110C      | family with sequence similarity 110 member C                                   | -2.2  |
| MT1L         | metallothionein 1L, pseudogene                                                 | -2.2  |
| CMYA5        | cardiomyopathy associated 5                                                    | -2.21 |
| LINC01679    | long intergenic non-protein coding RNA 1679                                    | -2.21 |
| RET          | ret proto-oncogene                                                             | -2.21 |
| TMEM26       | transmembrane protein 26                                                       | -2.21 |
| CDH1         | cadherin 1                                                                     | -2.22 |
| CR1          | complement C3b/C4b receptor 1 (Knops blood group)                              | -2.22 |
| CSRNP1       | cysteine and serine rich nuclear protein 1                                     | -2.22 |
| ELFN1        | extracellular leucine rich repeat and fibronectin type III domain containing 1 | -2.22 |
| FMO2         | flavin containing dimethylaniline monooxygenase 2                              | -2.22 |
| HNF4A-AS1    | HNF4A antisense RNA 1                                                          | -2.22 |
| KRTCAP3      | keratinocyte associated protein 3                                              | -2.22 |
| MXRA5        | matrix remodeling associated 5                                                 | -2.22 |
| OLFML3       | olfactomedin like 3                                                            | -2.22 |
| RETREG1      | reticulophagy regulator 1                                                      | -2.22 |
| SYT7         | synaptotagmin 7                                                                | -2.22 |
| LINC01831    | long intergenic non-protein coding RNA 1831                                    | -2.23 |
| LOC105375153 |                                                                                | -2.23 |
| GLDCP1       | glycine decarboxylase pseudogene 1                                             | -2.24 |
| KCNJ10       | potassium inwardly rectifying channel subfamily J member 10                    | -2.24 |
| LOC100506388 | uncharacterized LOC100506388                                                   | -2.24 |
| NR1I3        | nuclear receptor subfamily 1 group I member 3                                  | -2.24 |
| PRR18        | proline rich 18                                                                | -2.24 |
| RNF152       | ring finger protein 152                                                        | -2.24 |
| MRC1         | mannose receptor C-type 1                                                      | -2.25 |
| PAX5         | paired box 5                                                                   | -2.25 |
| AZGP1        | alpha-2-glycoprotein 1, zinc-binding                                           | -2.26 |
| LINC02754    | long intergenic non-protein coding RNA 2754                                    | -2.26 |
| RORB         | RAR related orphan receptor B                                                  | -2.26 |



|                         |                                                                       |       |
|-------------------------|-----------------------------------------------------------------------|-------|
| SARDH                   | sarcosine dehydrogenase                                               | -2.26 |
| TMEM30B                 | transmembrane protein 30B                                             | -2.26 |
| ARHGAP8/PRR5-ARHGAP8    | Rho GTPase activating protein 8                                       | -2.27 |
| FRMPD1                  | FERM and PDZ domain containing 1                                      | -2.27 |
| SLCO1B7                 | solute carrier organic anion transporter family member 1B7 (putative) | -2.27 |
| ASS1P1                  | argininosuccinate synthetase 1 pseudogene 1                           | -2.28 |
| DBH-AS1                 | DBH antisense RNA 1                                                   | -2.28 |
| FOXO1                   | forkhead box O1                                                       | -2.28 |
| FOXP2                   | forkhead box P2                                                       | -2.28 |
| IL1RAP                  | interleukin 1 receptor accessory protein                              | -2.28 |
| LRAT                    | lecithin retinol acyltransferase                                      | -2.28 |
| MAT1A                   | methionine adenosyltransferase 1A                                     | -2.28 |
| RAB36                   | RAB36, member RAS oncogene family                                     | -2.28 |
| ADRA2B                  | adrenoceptor alpha 2B                                                 | -2.29 |
| ITGAD                   | integrin subunit alpha D                                              | -2.29 |
| LIPG                    | lipase G, endothelial type                                            | -2.29 |
| PTGIS                   | prostaglandin I2 synthase                                             | -2.29 |
| RP11_108O102            |                                                                       | -2.29 |
| DACH1                   | dachshund family transcription factor 1                               | -2.3  |
| IGHD                    | immunoglobulin heavy constant delta                                   | -2.3  |
| LINC00671               | long intergenic non-protein coding RNA 671                            | -2.3  |
| XCR1                    | X-C motif chemokine receptor 1                                        | -2.3  |
| ANK3                    | ankyrin 3                                                             | -2.31 |
| FCRL3                   | Fc receptor like 3                                                    | -2.31 |
| GPLD1                   | glycosylphosphatidylinositol specific phospholipase D1                | -2.31 |
| KLKB1                   | kallikrein B1                                                         | -2.31 |
| F11                     | coagulation factor XI                                                 | -2.32 |
| GDF7                    | growth differentiation factor 7                                       | -2.32 |
| PANK1                   | pantothenate kinase 1                                                 | -2.32 |
| RP11_325P151            |                                                                       | -2.32 |
| SLC27A2                 | solute carrier family 27 member 2                                     | -2.32 |
| BLK                     | BLK proto-oncogene, Src family tyrosine kinase                        | -2.33 |
| ERRF11                  | ERBB receptor feedback inhibitor 1                                    | -2.33 |
| HPD                     | 4-hydroxyphenylpyruvate dioxygenase                                   | -2.33 |
| NSUN7                   | NOP2/Sun RNA methyltransferase family member 7                        | -2.33 |
| PPP1R3G                 | protein phosphatase 1 regulatory subunit 3G                           | -2.33 |
| PALM2                   | paralemmin 2                                                          | -2.33 |
| GCH1                    | GTP cyclohydrolase 1                                                  | -2.34 |
| KAZN                    | kazrin, periplakin interacting protein                                | -2.34 |
| LINC00365               | long intergenic non-protein coding RNA 365                            | -2.34 |
| PTN                     | pleiotrophin                                                          | -2.34 |
| SERPINA4                | serpin family A member 4                                              | -2.34 |
| TFPI2                   | tissue factor pathway inhibitor 2                                     | -2.34 |
| C1QTNF1                 | C1q and TNF related 1                                                 | -2.35 |
| CIDEB                   | cell death inducing DFFA like effector b                              | -2.35 |
| EVC                     | EvC ciliary complex subunit 1                                         | -2.35 |
| GLP2R                   | glucagon like peptide 2 receptor                                      | -2.35 |
| LILRB5                  | leukocyte immunoglobulin like receptor B5                             | -2.35 |
| MIRLET7A1HG             |                                                                       | -2.35 |
| NBPF13P                 |                                                                       | -2.35 |
| RGPD4 (includes others) | RANBP2 like and GRIP domain containing 5                              | -2.35 |
| CRISPLD2                | cysteine rich secretory protein LCCL domain containing 2              | -2.36 |
| GNA14                   | G protein subunit alpha 14                                            | -2.36 |
| N4BP2L1                 | NEDD4 binding protein 2 like 1                                        | -2.36 |
| TRPV3                   | transient receptor potential cation channel subfamily V member 3      | -2.36 |
| NNMT                    | nicotinamide N-methyltransferase                                      | -2.37 |

|              |                                                            |       |
|--------------|------------------------------------------------------------|-------|
| CD8A         | CD8a molecule                                              | -2.38 |
| CYP2C18      | cytochrome P450 family 2 subfamily C member 18             | -2.38 |
| LRRC55       | leucine rich repeat containing 55                          | -2.38 |
| PDK4         | pyruvate dehydrogenase kinase 4                            | -2.38 |
| ACADSB       | acyl-CoA dehydrogenase short/branched chain                | -2.39 |
| CTH          | cystathionine gamma-lyase                                  | -2.39 |
| LILRA5       | leukocyte immunoglobulin like receptor A5                  | -2.39 |
| LRRC31       | leucine rich repeat containing 31                          | -2.39 |
| SIGLEC11     | sialic acid binding Ig like lectin 11                      | -2.39 |
| BBOX1        | gamma-butyrobetaine hydroxylase 1                          | -2.4  |
| LTK          | leukocyte receptor tyrosine kinase                         | -2.4  |
| EGR1         | early growth response 1                                    | -2.41 |
| HS1BP3-IT1   | HS1BP3 intronic transcript 1                               | -2.41 |
| TTR          | transthyretin                                              | -2.41 |
| A2M          | alpha-2-macroglobulin                                      | -2.42 |
| EPHA3        | EPH receptor A3                                            | -2.42 |
| LGSN         | lengsin, lens protein with glutamine synthetase domain     | -2.42 |
| LINC00598    | long intergenic non-protein coding RNA 598                 | -2.42 |
| RP11_404G162 |                                                            | -2.42 |
| APOH         | apolipoprotein H                                           | -2.43 |
| LCN10        | lipocalin 10                                               | -2.43 |
| LOC102723701 | uncharacterized LOC102723701                               | -2.43 |
| MTUS2        | microtubule associated scaffold protein 2                  | -2.43 |
| PRELP        | proline and arginine rich end leucine rich repeat protein  | -2.43 |
| ASPDH        | aspartate dehydrogenase domain containing                  | -2.44 |
| EDAR         | ectodysplasin A receptor                                   | -2.44 |
| EGILA        |                                                            | -2.44 |
| LPAL2        | lipoprotein(a) like 2, pseudogene                          | -2.44 |
| LY6E         | lymphocyte antigen 6 family member E                       | -2.44 |
| CPN1         | carboxypeptidase N subunit 1                               | -2.45 |
| DMKN         | dermokine                                                  | -2.45 |
| PODN         | podocan                                                    | -2.45 |
| C3P1         | complement component 3 precursor pseudogene                | -2.46 |
| FETUB        | fetuin B                                                   | -2.46 |
| AMDHD1       | amidohydrolase domain containing 1                         | -2.47 |
| DMGDH        | dimethylglycine dehydrogenase                              | -2.47 |
| F11-AS1      | F11 antisense RNA 1                                        | -2.47 |
| FOS          | Fos proto-oncogene, AP-1 transcription factor subunit      | -2.47 |
| PON3         | paraoxonase 3                                              | -2.47 |
| RND2         | Rho family GTPase 2                                        | -2.47 |
| TCP10L       | t-complex 10 like                                          | -2.47 |
| NPY1R        | neuropeptide Y receptor Y1                                 | -2.48 |
| OAT          | ornithine aminotransferase                                 | -2.48 |
| TCIM         | transcriptional and immune response regulator              | -2.48 |
| CCL14        | C-C motif chemokine ligand 14                              | -2.49 |
| CYS1         | cystin 1                                                   | -2.49 |
| GRAMD1C      | GRAM domain containing 1C                                  | -2.49 |
| IRF4         | interferon regulatory factor 4                             | -2.49 |
| NTS          | neurotensin                                                | -2.49 |
| PKHD1        | PKHD1 ciliary IPT domain containing fibrocystin/polyductin | -2.49 |
| PPARGC1A     | PPARG coactivator 1 alpha                                  | -2.49 |
| LINC00844    | long intergenic non-protein coding RNA 844                 | -2.5  |
| SGCA         | sarcoglycan alpha                                          | -2.5  |
| SIK1/SIK1B   | salt inducible kinase 1                                    | -2.5  |
| ANGPTL1      | angiopoietin like 1                                        | -2.51 |
| ANO3         | anoctamin 3                                                | -2.51 |
| MT1A         | metallothionein 1A                                         | -2.51 |

|             |                                                                  |       |
|-------------|------------------------------------------------------------------|-------|
| AQP3        | aquaporin 3 (Gill blood group)                                   | -2.52 |
| CH17_360D52 |                                                                  | -2.52 |
| ACSL1       | acyl-CoA synthetase long chain family member 1                   | -2.53 |
| APBA1       | amyloid beta precursor protein binding family A member 1         | -2.53 |
| CXCR2P1     | C-X-C motif chemokine receptor 2 pseudogene 1                    | -2.53 |
| SNX29P2     | sorting nexin 29 pseudogene 2                                    | -2.53 |
| INMT        | indolethylamine N-methyltransferase                              | -2.54 |
| NTRK3       | neurotrophic receptor tyrosine kinase 3                          | -2.54 |
| TPPP2       | tubulin polymerization promoting protein family member 2         | -2.54 |
| CYP4F2      | cytochrome P450 family 4 subfamily F member 2                    | -2.55 |
| HGF         | hepatocyte growth factor                                         | -2.55 |
| LINC00319   | long intergenic non-protein coding RNA 319                       | -2.55 |
| TCF21       | transcription factor 21                                          | -2.55 |
| SLC25A15    | solute carrier family 25 member 15                               | -2.56 |
| TAT-AS1     | TAT antisense RNA 1                                              | -2.56 |
| MMRN1       | multimerin 1                                                     | -2.57 |
| CA2         | carbonic anhydrase 2                                             | -2.58 |
| LRRC3       | leucine rich repeat containing 3                                 | -2.58 |
| IL1RAPL2    | interleukin 1 receptor accessory protein like 2                  | -2.59 |
| MPPED1      | metallophosphoesterase domain containing 1                       | -2.59 |
| NAT2        | N-acetyltransferase 2                                            | -2.59 |
| TREH        | trehalase                                                        | -2.59 |
| HSD17B2     | hydroxysteroid 17-beta dehydrogenase 2                           | -2.6  |
| LEPR        | leptin receptor                                                  | -2.6  |
| NIPAL1      | NIPA like domain containing 1                                    | -2.6  |
| PROM1       | prominin 1                                                       | -2.6  |
| RP11_90L18  |                                                                  | -2.6  |
| DNM3OS      | DNM3 opposite strand/antisense RNA                               | -2.61 |
| FPR2        | formyl peptide receptor 2                                        | -2.61 |
| POU2AF1     | POU class 2 homeobox associating factor 1                        | -2.61 |
| TMC4        | transmembrane channel like 4                                     | -2.61 |
| C8B         | complement C8 beta chain                                         | -2.62 |
| DTHD1       | death domain containing 1                                        | -2.62 |
| SRPX        | sushi repeat containing protein X-linked                         | -2.62 |
| STEAP4      | STEAP4 metalloreductase                                          | -2.62 |
| IYD         | iodotyrosine deiodinase                                          | -2.63 |
| XDH         | xanthine dehydrogenase                                           | -2.63 |
| ABI3BP      | ABI family member 3 binding protein                              | -2.64 |
| AC092053.3  |                                                                  | -2.64 |
| ARID3C      | AT-rich interaction domain 3C                                    | -2.64 |
| NOCT        | nocturnin                                                        | -2.64 |
| CNTN3       | contactin 3                                                      | -2.65 |
| DNAH6       | dynein axonemal heavy chain 6                                    | -2.65 |
| SLCO4C1     | solute carrier organic anion transporter family member 4C1       | -2.65 |
| CFHR3       | complement factor H related 3                                    | -2.66 |
| RP11_258F12 |                                                                  | -2.66 |
| ALKAL2      | ALK and LTK ligand 2                                             | -2.67 |
| CXCL2       | C-X-C motif chemokine ligand 2                                   | -2.67 |
| MRGPRF      | MAS related GPR family member F                                  | -2.67 |
| SPATA18     | spermatogenesis associated 18                                    | -2.67 |
| TRPV4       | transient receptor potential cation channel subfamily V member 4 | -2.67 |
| ABCA8       | ATP binding cassette subfamily A member 8                        | -2.68 |
| AQP4        | aquaporin 4                                                      | -2.68 |
| CASR        | calcium sensing receptor                                         | -2.68 |
| FAM9B       | family with sequence similarity 9 member B                       | -2.68 |
| FNDC5       | fibronectin type III domain containing 5                         | -2.68 |
| MUC3A       | mucin 3A, cell surface associated                                | -2.68 |

|                           |                                                                |       |
|---------------------------|----------------------------------------------------------------|-------|
| THBS1                     | thrombospondin 1                                               | -2.68 |
| ALDH6A1                   | aldehyde dehydrogenase 6 family member A1                      | -2.69 |
| SLC16A9                   | solute carrier family 16 member 9                              | -2.69 |
| ALB                       | albumin                                                        | -2.7  |
| SLC51A                    | solute carrier family 51 subunit alpha                         | -2.7  |
| TBX15                     | T-box transcription factor 15                                  | -2.7  |
| KB_68A71                  |                                                                | -2.71 |
| MT2A                      | metallothionein 2A                                             | -2.71 |
| NEU4                      | neuraminidase 4                                                | -2.71 |
| PLIN1                     | perilipin 1                                                    | -2.71 |
| SLC28A3                   | solute carrier family 28 member 3                              | -2.71 |
| KBTBD11                   | kelch repeat and BTB domain containing 11                      | -2.72 |
| PRRT1B                    | proline rich transmembrane protein 1B                          | -2.72 |
| SLC39A5                   | solute carrier family 39 member 5                              | -2.72 |
| TDRD15                    | tudor domain containing 15                                     | -2.72 |
| FCRL1                     | Fc receptor like 1                                             | -2.74 |
| LCAT                      | lecithin-cholesterol acyltransferase                           | -2.74 |
| TMEM132E                  | transmembrane protein 132E                                     | -2.74 |
| EHD3                      | EH domain containing 3                                         | -2.75 |
| SLC7A2                    | solute carrier family 7 member 2                               | -2.75 |
| CLRN3                     | clarin 3                                                       | -2.76 |
| GOLGA6A (includes others) | golgin A6 family member A                                      | -2.76 |
| ATF5                      | activating transcription factor 5                              | -2.77 |
| HBA1/HBA2                 | hemoglobin subunit alpha 2                                     | -2.77 |
| NTF3                      | neurotrophin 3                                                 | -2.77 |
| SLC27A5                   | solute carrier family 27 member 5                              | -2.77 |
| ANXA10                    | annexin A10                                                    | -2.78 |
| GFRA1                     | GDNF family receptor alpha 1                                   | -2.78 |
| LINC02428                 | long intergenic non-protein coding RNA 2428                    | -2.78 |
| PROZ                      | protein Z, vitamin K dependent plasma glycoprotein             | -2.78 |
| VNN1                      | vanin 1                                                        | -2.78 |
| ANGPTL6                   | angiopoietin like 6                                            | -2.79 |
| LINC01595                 | long intergenic non-protein coding RNA 1595                    | -2.79 |
| WNT9A                     | Wnt family member 9A                                           | -2.79 |
| CHST9                     | carbohydrate sulfotransferase 9                                | -2.8  |
| PDGFRA                    | platelet derived growth factor receptor alpha                  | -2.8  |
| ST8SIA6                   | ST8 alpha-N-acetyl-neuraminidase alpha-2,8-sialyltransferase 6 | -2.8  |
| CTD-3080P12.3             | uncharacterized LOC101928857                                   | -2.81 |
| HAS2                      | hyaluronan synthase 2                                          | -2.81 |
| KMO                       | kynurenine 3-monooxygenase                                     | -2.81 |
| LINC02027                 | long intergenic non-protein coding RNA 2027                    | -2.81 |
| RNF165                    | ring finger protein 165                                        | -2.81 |
| PI4K2B                    | phosphatidylinositol 4-kinase type 2 beta                      | -2.81 |
| CTD_2033D153              |                                                                | -2.82 |
| GLT1D1                    | glycosyltransferase 1 domain containing 1                      | -2.82 |
| HMGCS2                    | 3-hydroxy-3-methylglutaryl-CoA synthase 2                      | -2.82 |
| MT1X                      | metallothionein 1X                                             | -2.82 |
| SAMD11                    | sterile alpha motif domain containing 11                       | -2.82 |
| FAM95C                    | family with sequence similarity 95 member C                    | -2.83 |
| HPGD                      | 15-hydroxyprostaglandin dehydrogenase                          | -2.84 |
| NPTX2                     | neuronal pentraxin 2                                           | -2.84 |
| SELP                      | selectin P                                                     | -2.84 |
| ANKRD36BP2                | ankyrin repeat domain 36B pseudogene 2                         | -2.85 |
| COLEC11                   | collectin subfamily member 11                                  | -2.85 |
| FTCD                      | formimidoyltransferase cyclodeaminase                          | -2.85 |
| NRG3                      | neuregulin 3                                                   | -2.85 |

|               |                                                                   |       |
|---------------|-------------------------------------------------------------------|-------|
| PAMR1         | peptidase domain containing associated with muscle regeneration 1 | -2.85 |
| WNT11         | Wnt family member 11                                              | -2.85 |
| AGXT          | alanine--glyoxylate and serine--pyruvate aminotransferase         | -2.86 |
| TACSTD2       | tumor associated calcium signal transducer 2                      | -2.86 |
| TCTEX1D1      | Tctex1 domain containing 1                                        | -2.86 |
| NR4A3         | nuclear receptor subfamily 4 group A member 3                     | -2.87 |
| RP4_669P1016  |                                                                   | -2.87 |
| ABCA13        | ATP binding cassette subfamily A member 13                        | -2.88 |
| MBL2          | mannose binding lectin 2                                          | -2.89 |
| MZB1          | marginal zone B and B1 cell specific protein                      | -2.89 |
| ARHGEF4       | Rho guanine nucleotide exchange factor 4                          | -2.9  |
| MRO           | maestro                                                           | -2.91 |
| MTND4P20      | MT-ND4 pseudogene 20                                              | -2.91 |
| SOCS2-AS1     | SOCS2 antisense RNA 1                                             | -2.91 |
| LIFR          | LIF receptor subunit alpha                                        | -2.92 |
| OMD           | osteomodulin                                                      | -2.92 |
| RIC3          | RIC3 acetylcholine receptor chaperone                             | -2.92 |
| IGKV2D-28     | immunoglobulin kappa variable 2D-28                               | -2.93 |
| WNK2          | WNK lysine deficient protein kinase 2                             | -2.93 |
| AADAT         | aminoadipate aminotransferase                                     | -2.94 |
| C6            | complement C6                                                     | -2.94 |
| CD79A         | CD79a molecule                                                    | -2.94 |
| DTX1          | deltex E3 ubiquitin ligase 1                                      | -2.94 |
| KDM8          | lysine demethylase 8                                              | -2.94 |
| LRRN3         | leucine rich repeat neuronal 3                                    | -2.94 |
| RP11_548K2311 |                                                                   | -2.94 |
| SEC14L3       | SEC14 like lipid binding 3                                        | -2.94 |
| ECM1          | extracellular matrix protein 1                                    | -2.95 |
| KIF19         | kinesin family member 19                                          | -2.95 |
| MS4A1         | membrane spanning 4-domains A1                                    | -2.95 |
| PITPNM3       | PITPNM family member 3                                            | -2.95 |
| PWWP3B        | PWWP domain containing 3B                                         | -2.95 |
| AJAP1         | adherens junctions associated protein 1                           | -2.97 |
| PLGLB1/PLGLB2 | plasminogen like B2                                               | -2.97 |
| TRPC5         | transient receptor potential cation channel subfamily C member 5  | -2.97 |
| AZGP1P1       | AZGP1 pseudogene 1                                                | -2.98 |
| CNGA1         | cyclic nucleotide gated channel subunit alpha 1                   | -2.98 |
| DPF3          | double PHD fingers 3                                              | -2.98 |
| LINC02197     | long intergenic non-protein coding RNA 2197                       | -2.98 |
| LOC101928858  | uncharacterized LOC101928858                                      | -2.98 |
| MYOM2         | myomesin 2                                                        | -2.98 |
| CH507_42P116  |                                                                   | -2.99 |
| HAND2         | heart and neural crest derivatives expressed 2                    | -3    |
| C3orf85       | chromosome 3 open reading frame 85                                | -3.02 |
| ADGRE1        | adhesion G protein-coupled receptor E1                            | -3.03 |
| GBA3          | glucosylceramidase beta 3 (gene/pseudogene)                       | -3.03 |
| GLYAT         | glycine-N-acyltransferase                                         | -3.03 |
| LINC01767     | long intergenic non-protein coding RNA 1767                       | -3.03 |
| LINC02593     | long intergenic non-protein coding RNA 2593                       | -3.03 |
| ALLC          | allantoicase                                                      | -3.04 |
| ANGPTL4       | angiopoietin like 4                                               | -3.04 |
| ASS1          | argininosuccinate synthase 1                                      | -3.04 |
| GLYATL1       | glycine-N-acyltransferase like 1                                  | -3.04 |
| IGHV4-28      | immunoglobulin heavy variable 4-28                                | -3.04 |
| LINC02362     | long intergenic non-protein coding RNA 2362                       | -3.04 |
| LRCOL1        | leucine rich colipase like 1                                      | -3.04 |
| CYP39A1       | cytochrome P450 family 39 subfamily A member 1                    | -3.05 |

|               |                                                            |       |
|---------------|------------------------------------------------------------|-------|
| NGFR          | nerve growth factor receptor                               | -3.05 |
| FAM163B       | family with sequence similarity 163 member B               | -3.06 |
| KCNJ3         | potassium inwardly rectifying channel subfamily J member 3 | -3.06 |
| KRT7          | keratin 7                                                  | -3.06 |
| TDO2          | tryptophan 2,3-dioxygenase                                 | -3.06 |
| CTD_25271215  |                                                            | -3.07 |
| FAM83A-AS1    | FAM83A antisense RNA 1                                     | -3.07 |
| HPX           | hemopexin                                                  | -3.07 |
| ITGB8         | integrin subunit beta 8                                    | -3.07 |
| LINC02499     | long intergenic non-protein coding RNA 2499                | -3.07 |
| AC1048092     |                                                            | -3.08 |
| BCO2          | beta-carotene oxygenase 2                                  | -3.08 |
| TMEM125       | transmembrane protein 125                                  | -3.08 |
| KANK4         | KN motif and ankyrin repeat domains 4                      | -3.09 |
| LINC01018     | long intergenic non-protein coding RNA 1018                | -3.09 |
| LOC100132813  | uncharacterized LOC100132813                               | -3.09 |
| CLIC6         | chloride intracellular channel 6                           | -3.1  |
| CTC_505032    |                                                            | -3.1  |
| FABP1         | fatty acid binding protein 1                               | -3.1  |
| GRM8          | glutamate metabotropic receptor 8                          | -3.11 |
| RP11_256L63   |                                                            | -3.11 |
| ANKRD55       | ankyrin repeat domain 55                                   | -3.12 |
| ALDOB         | aldolase, fructose-bisphosphate B                          | -3.13 |
| BHMT          | betaine--homocysteine S-methyltransferase                  | -3.13 |
| GADD45B       | growth arrest and DNA damage inducible beta                | -3.13 |
| ATP13A4       | ATPase 13A4                                                | -3.14 |
| FCRL2         | Fc receptor like 2                                         | -3.14 |
| FENDRR        | FOXF1 adjacent non-coding developmental regulatory RNA     | -3.14 |
| SHBG          | sex hormone binding globulin                               | -3.14 |
| AL1616685     |                                                            | -3.15 |
| ATOX8         | atonal bHLH transcription factor 8                         | -3.15 |
| DSCAML1       | DS cell adhesion molecule like 1                           | -3.15 |
| PZP           | PZP alpha-2-macroglobulin like                             | -3.15 |
| TENM1         | teneurin transmembrane protein 1                           | -3.15 |
| CALN1         | calneuron 1                                                | -3.16 |
| ESR1          | estrogen receptor 1                                        | -3.16 |
| MTND5P1       | MT-ND5 pseudogene 1                                        | -3.16 |
| COL25A1       | collagen type XXV alpha 1 chain                            | -3.17 |
| CCL19         | C-C motif chemokine ligand 19                              | -3.18 |
| IL13RA2       | interleukin 13 receptor subunit alpha 2                    | -3.18 |
| NPAP1         | nuclear pore associated protein 1                          | -3.18 |
| THRSP         | thyroid hormone responsive                                 | -3.18 |
| TMEM82        | transmembrane protein 82                                   | -3.18 |
| ADAMTSL2      | ADAMTS like 2                                              | -3.19 |
| IGHV3-43      | immunoglobulin heavy variable 3-43                         | -3.19 |
| KRT7-AS       | KRT7 antisense RNA 1                                       | -3.19 |
| PLAC8         | placenta associated 8                                      | -3.19 |
| RP11_96D16    |                                                            | -3.2  |
| NIBAN3        | niban apoptosis regulator 3                                | -3.21 |
| NRG1          | neuregulin 1                                               | -3.21 |
| PKHD1L1       | PKHD1 like 1                                               | -3.21 |
| RP11_1035H133 |                                                            | -3.21 |
| IGLV6-57      | immunoglobulin lambda variable 6-57                        | -3.23 |
| PLXNA4        | plexin A4                                                  | -3.24 |
| CLSTN2        | calsyntenin 2                                              | -3.25 |
| FREM1         | FRAS1 related extracellular matrix 1                       | -3.25 |
| SFRP1         | secreted frizzled related protein 1                        | -3.25 |

|                 |                                                                     |       |
|-----------------|---------------------------------------------------------------------|-------|
| LINC01348       | long intergenic non-protein coding RNA 1348                         | -3.26 |
| PLGLA           | plasminogen like A (pseudogene)                                     | -3.26 |
| DIO3OS          | DIO3 opposite strand upstream RNA                                   | -3.27 |
| LINC00313       | long intergenic non-protein coding RNA 313                          | -3.27 |
| RDH16           | retinol dehydrogenase 16                                            | -3.27 |
| TRPV6           | transient receptor potential cation channel subfamily V member 6    | -3.27 |
| SLCO1B3-SLCO1B7 | SLCO1B3-SLCO1B7 readthrough                                         | -3.28 |
| B3GALT5         | beta-1,3-galactosyltransferase 5                                    | -3.29 |
| F9              | coagulation factor IX                                               | -3.29 |
| DBH             | dopamine beta-hydroxylase                                           | -3.3  |
| ADCY1           | adenylate cyclase 1                                                 | -3.31 |
| RP11_286N2216   |                                                                     | -3.31 |
| IGHV4-4         | immunoglobulin heavy variable 4-4                                   | -3.32 |
| RP4_568C114     |                                                                     | -3.32 |
| ASPA            | aspartoacylase                                                      | -3.33 |
| CPS1            | carbamoyl-phosphate synthase 1                                      | -3.35 |
| CXCR5           | C-X-C motif chemokine receptor 5                                    | -3.35 |
| SPSB4           | splA/ryanodine receptor domain and SOCS box containing 4            | -3.36 |
| RP11_39H32      |                                                                     | -3.37 |
| FGFR2           | fibroblast growth factor receptor 2                                 | -3.39 |
| FAM99B          | family with sequence similarity 99 member B                         | -3.4  |
| AFM             | afamin                                                              | -3.41 |
| CAMK2B          | calcium/calmodulin dependent protein kinase II beta                 | -3.41 |
| ALOX15P1        | arachidonate 15-lipoxygenase pseudogene 1                           | -3.42 |
| AMD1P4          | adenosylmethionine decarboxylase 1 pseudogene 4                     | -3.42 |
| GPRIN2          | G protein regulated inducer of neurite outgrowth 2                  | -3.42 |
| PPP1R1A         | protein phosphatase 1 regulatory inhibitor subunit 1A               | -3.42 |
| IGLV1-51        | immunoglobulin lambda variable 1-51                                 | -3.44 |
| KCNK17          | potassium two pore domain channel subfamily K member 17             | -3.44 |
| RP11_96O204     |                                                                     | -3.44 |
| SLC13A2         | solute carrier family 13 member 2                                   | -3.45 |
| SRD5A2          | steroid 5 alpha-reductase 2                                         | -3.45 |
| IGHV3-30        | immunoglobulin heavy variable 3-30                                  | -3.46 |
| FXYD2           | FXYD domain containing ion transport regulator 2                    | -3.47 |
| PLCXD3          | phosphatidylinositol specific phospholipase C X domain containing 3 | -3.47 |
| RANBP3L         | RAN binding protein 3 like                                          | -3.47 |
| HAND2-AS1       | HAND2 antisense RNA 1                                               | -3.48 |
| SLC13A5         | solute carrier family 13 member 5                                   | -3.49 |
| ADAMTS13        | ADAM metalloproteinase with thrombospondin type 1 motif 13          | -3.5  |
| ACOT12          | acyl-CoA thioesterase 12                                            | -3.51 |
| CNTN1           | contactin 1                                                         | -3.51 |
| IGHA2           | immunoglobulin heavy constant alpha 2 (A2m marker)                  | -3.51 |
| CTD_2527I214    |                                                                     | -3.52 |
| CTNNA3          | catenin alpha 3                                                     | -3.52 |
| EPCAM           | epithelial cell adhesion molecule                                   | -3.52 |
| GREM2           | gremlin 2, DAN family BMP antagonist                                | -3.52 |
| NXF3            | nuclear RNA export factor 3                                         | -3.52 |
| SLCO1B3         | solute carrier organic anion transporter family member 1B3          | -3.52 |
| CXCL12          | C-X-C motif chemokine ligand 12                                     | -3.53 |
| FRMD1           | FERM domain containing 1                                            | -3.53 |
| IGHV3-20        | immunoglobulin heavy variable 3-20                                  | -3.53 |
| MT1E            | metallothionein 1E                                                  | -3.53 |
| CRYAA/CRYAA2    | crystallin alpha A                                                  | -3.54 |
| IGLV7-46        | immunoglobulin lambda variable 7-46 (gene/pseudogene)               | -3.54 |
| DLGAP2          | DLG associated protein 2                                            | -3.55 |
| ZG16            | zymogen granule protein 16                                          | -3.55 |
| SERPINA11       | serpin family A member 11                                           | -3.56 |

|               |                                                             |       |
|---------------|-------------------------------------------------------------|-------|
| G6PC          | glucose-6-phosphatase catalytic subunit                     | -3.57 |
| SLC10A1       | solute carrier family 10 member 1                           | -3.57 |
| FAM30A        | family with sequence similarity 30 member A                 | -3.58 |
| GYS2          | glycogen synthase 2                                         | -3.58 |
| IGF1          | insulin like growth factor 1                                | -3.58 |
| IGHG2         | immunoglobulin heavy constant gamma 2 (G2m marker)          | -3.58 |
| IGHV3-66      | immunoglobulin heavy variable 3-66                          | -3.58 |
| APOA4         | apolipoprotein A4                                           | -3.59 |
| CYP2C9        | cytochrome P450 family 2 subfamily C member 9               | -3.59 |
| FCRL5         | Fc receptor like 5                                          | -3.6  |
| IGHV3-33      | immunoglobulin heavy variable 3-33                          | -3.6  |
| ARHGEF18      | Rho/Rac guanine nucleotide exchange factor 18               | -3.61 |
| UNC93A        | unc-93 homolog A                                            | -3.61 |
| ADGRB3        | adhesion G protein-coupled receptor B3                      | -3.62 |
| CFP           | complement factor properdin                                 | -3.62 |
| IDO2          | indoleamine 2,3-dioxygenase 2                               | -3.62 |
| IGKV1-39      | immunoglobulin kappa variable 1-39 (gene/pseudogene)        | -3.62 |
| IGHV3-53      | immunoglobulin heavy variable 3-53                          | -3.63 |
| IGKV1-27      | immunoglobulin kappa variable 1-27                          | -3.65 |
| AVPR1A        | arginine vasopressin receptor 1A                            | -3.66 |
| GNMT          | glycine N-methyltransferase                                 | -3.66 |
| IGHV3-73      | immunoglobulin heavy variable 3-73                          | -3.66 |
| RP11_108K1412 |                                                             | -3.66 |
| SLC34A2       | solute carrier family 34 member 2                           | -3.66 |
| IGHV3-74      | immunoglobulin heavy variable 3-74                          | -3.68 |
| IGLV3-1       | immunoglobulin lambda variable 3-1                          | -3.68 |
| CDH19         | cadherin 19                                                 | -3.69 |
| LYVE1         | lymphatic vessel endothelial hyaluronan receptor 1          | -3.69 |
| APOA5         | apolipoprotein A5                                           | -3.7  |
| CCL21         | C-C motif chemokine ligand 21                               | -3.7  |
| FAM151A       | family with sequence similarity 151 member A                | -3.7  |
| FBP1          | fructose-bisphosphatase 1                                   | -3.7  |
| IGHV3-72      | immunoglobulin heavy variable 3-72                          | -3.7  |
| IGLV3-9       | immunoglobulin lambda variable 3-9 (gene/pseudogene)        | -3.7  |
| ITLN1         | intelectin 1                                                | -3.7  |
| SOCS2         | suppressor of cytokine signaling 2                          | -3.7  |
| TTC36         | tetratricopeptide repeat domain 36                          | -3.7  |
| IGHV2-70      | immunoglobulin heavy variable 2-70                          | -3.71 |
| PTH1R         | parathyroid hormone 1 receptor                              | -3.72 |
| TTL2          | tubulin tyrosine ligase like 2                              | -3.72 |
| CYP3A7        | cytochrome P450 family 3 subfamily A member 7               | -3.73 |
| IGLC1         | immunoglobulin lambda constant 1                            | -3.73 |
| SDS           | serine dehydratase                                          | -3.74 |
| RIPOR3        | RIPOR family member 3                                       | -3.75 |
| GPR182        | G protein-coupled receptor 182                              | -3.76 |
| GPM6A         | glycoprotein M6A                                            | -3.77 |
| IL1RL1        | interleukin 1 receptor like 1                               | -3.77 |
| KCNJ16        | potassium inwardly rectifying channel subfamily J member 16 | -3.77 |
| FOLH1B        | folate hydrolase 1B                                         | -3.78 |
| CYP3A43       | cytochrome P450 family 3 subfamily A member 43              | -3.79 |
| MOGAT2        | monoacylglycerol O-acyltransferase 2                        | -3.8  |
| APOF          | apolipoprotein F                                            | -3.81 |
| IGLV3-25      | immunoglobulin lambda variable 3-25                         | -3.81 |
| CETP          | cholesteryl ester transfer protein                          | -3.82 |
| IGLV3-10      | immunoglobulin lambda variable 3-10                         | -3.83 |
| ADGRG7        | adhesion G protein-coupled receptor G7                      | -3.84 |
| IGHV1-69      | immunoglobulin heavy variable 1-69                          | -3.84 |



|             |                                                          |       |
|-------------|----------------------------------------------------------|-------|
| IGKV1-5     | immunoglobulin kappa variable 1-5                        | -3.84 |
| IGLV1-47    | immunoglobulin lambda variable 1-47                      | -3.84 |
| IGLV2-8     | immunoglobulin lambda variable 2-8                       | -3.84 |
| ST6GAL2     | ST6 beta-galactoside alpha-2,6-sialyltransferase 2       | -3.84 |
| CFTR        | CF transmembrane conductance regulator                   | -3.85 |
| SMIM24      | small integral membrane protein 24                       | -3.85 |
| IGHA1       | immunoglobulin heavy constant alpha 1                    | -3.86 |
| IGHV4-34    | immunoglobulin heavy variable 4-34                       | -3.87 |
| IGLV8-61    | immunoglobulin lambda variable 8-61                      | -3.87 |
| IGLC2       | immunoglobulin lambda constant 2                         | -3.88 |
| IGKV1D-39   | immunoglobulin kappa variable 1D-39                      | -3.9  |
| IGHV1-69D   | immunoglobulin heavy variable 1-69D                      | -3.92 |
| TAT         | tyrosine aminotransferase                                | -3.92 |
| CHRD1       | chordin like 1                                           | -3.93 |
| GHR         | growth hormone receptor                                  | -3.93 |
| LECT2       | leukocyte cell derived chemotaxin 2                      | -3.94 |
| IGLV3-19    | immunoglobulin lambda variable 3-19                      | -3.95 |
| SCN7A       | sodium voltage-gated channel alpha subunit 7             | -3.95 |
| SLITRK6     | SLIT and NTRK like family member 6                       | -3.95 |
| MFAP4       | microfibril associated protein 4                         | -3.98 |
| ADH1A       | alcohol dehydrogenase 1A (class I), alpha polypeptide    | -3.99 |
| CYP2C8      | cytochrome P450 family 2 subfamily C member 8            | -4    |
| PGLYRP2     | peptidoglycan recognition protein 2                      | -4    |
| IGHV3-13    | immunoglobulin heavy variable 3-13                       | -4.01 |
| IGKC        | immunoglobulin kappa constant                            | -4.01 |
| MT1F        | metallothionein 1F                                       | -4.01 |
| IGKV1-17    | immunoglobulin kappa variable 1-17                       | -4.02 |
| CLDN10      | claudin 10                                               | -4.03 |
| IGHV1-2     | immunoglobulin heavy variable 1-2                        | -4.03 |
| DCN         | decorin                                                  | -4.04 |
| IGHV4-39    | immunoglobulin heavy variable 4-39                       | -4.04 |
| KRT19       | keratin 19                                               | -4.04 |
| LOC200772   | uncharacterized LOC200772                                | -4.04 |
| MT1G        | metallothionein 1G                                       | -4.04 |
| IGHV4-31    | immunoglobulin heavy variable 4-31                       | -4.05 |
| IGKV4-1     | immunoglobulin kappa variable 4-1                        | -4.05 |
| WNT2        | Wnt family member 2                                      | -4.06 |
| IGHV2-5     | immunoglobulin heavy variable 2-5                        | -4.07 |
| IGHV5-51    | immunoglobulin heavy variable 5-51                       | -4.07 |
| IGLC3       | immunoglobulin lambda constant 3 (Kern-Oz+ marker)       | -4.07 |
| IGLV1-44    | immunoglobulin lambda variable 1-44                      | -4.07 |
| IGHV6-1     | immunoglobulin heavy variable 6-1                        | -4.08 |
| IGHV3-15    | immunoglobulin heavy variable 3-15                       | -4.09 |
| B3GAT1      | beta-1,3-glucuronyltransferase 1                         | -4.1  |
| CNTFR       | ciliary neurotrophic factor receptor                     | -4.1  |
| HAL         | histidine ammonia-lyase                                  | -4.1  |
| IGKV3-11    | immunoglobulin kappa variable 3-11                       | -4.1  |
| MT1H        | metallothionein 1H                                       | -4.1  |
| IGHV3-11    | immunoglobulin heavy variable 3-11 (gene/pseudogene)     | -4.11 |
| IGHV3-48    | immunoglobulin heavy variable 3-48                       | -4.11 |
| SCARA5      | scavenger receptor class A member 5                      | -4.11 |
| IGHV1-46    | immunoglobulin heavy variable 1-46                       | -4.13 |
| IGLL1/IGLL5 | immunoglobulin lambda like polypeptide 1                 | -4.13 |
| PDZRN4      | PDZ domain containing ring finger 4                      | -4.13 |
| IGHM        | immunoglobulin heavy constant mu                         | -4.14 |
| KCNN2       | potassium calcium-activated channel subfamily N member 2 | -4.14 |
| RP3_342P202 |                                                          | -4.14 |

|           |                                                        |       |
|-----------|--------------------------------------------------------|-------|
| IGHV3-49  | immunoglobulin heavy variable 3-49                     | -4.15 |
| IGKV2-24  | immunoglobulin kappa variable 2-24                     | -4.15 |
| OIT3      | oncogene induced transcript 3                          | -4.16 |
| IGHV1-18  | immunoglobulin heavy variable 1-18                     | -4.17 |
| IGHG4     | immunoglobulin heavy constant gamma 4 (G4m marker)     | -4.18 |
| IGKV3-20  | immunoglobulin kappa variable 3-20                     | -4.18 |
| IGLV2-23  | immunoglobulin lambda variable 2-23                    | -4.18 |
| IGHV1-24  | immunoglobulin heavy variable 1-24                     | -4.19 |
| BMP5      | bone morphogenetic protein 5                           | -4.2  |
| IGKV1-16  | immunoglobulin kappa variable 1-16                     | -4.2  |
| IGKV1-33  | immunoglobulin kappa variable 1-33                     | -4.21 |
| IGLV4-69  | immunoglobulin lambda variable 4-69                    | -4.21 |
| ADH4      | alcohol dehydrogenase 4 (class II), pi polypeptide     | -4.24 |
| FAM99A    | family with sequence similarity 99 member A            | -4.24 |
| IGLV3-21  | immunoglobulin lambda variable 3-21                    | -4.26 |
| IGHG1     | immunoglobulin heavy constant gamma 1 (G1m marker)     | -4.27 |
| IGHV4-61  | immunoglobulin heavy variable 4-61                     | -4.28 |
| GABRB3    | gamma-aminobutyric acid type A receptor subunit beta3  | -4.29 |
| IGKV1-9   | immunoglobulin kappa variable 1-9                      | -4.31 |
| MUC6      | mucin 6, oligomeric mucus/gel-forming                  | -4.31 |
| NPBWR1    | neuropeptides B and W receptor 1                       | -4.31 |
| TIMD4     | T cell immunoglobulin and mucin domain containing 4    | -4.31 |
| DNASE1L3  | deoxyribonuclease 1 like 3                             | -4.35 |
| CDHR2     | cadherin related family member 2                       | -4.36 |
| GABRP     | gamma-aminobutyric acid type A receptor subunit pi     | -4.36 |
| MFSD2A    | major facilitator superfamily domain containing 2A     | -4.36 |
| BICDL2    | BICD family like cargo adaptor 2                       | -4.37 |
| VIPR1     | vasoactive intestinal peptide receptor 1               | -4.37 |
| AKR1D1    | aldo-keto reductase family 1 member D1                 | -4.38 |
| IGHG3     | immunoglobulin heavy constant gamma 3 (G3m marker)     | -4.39 |
| RSPO3     | R-spondin 3                                            | -4.4  |
| SLC22A10  | solute carrier family 22 member 10                     | -4.4  |
| CHRM2     | cholinergic receptor muscarinic 2                      | -4.41 |
| IGLV1-40  | immunoglobulin lambda variable 1-40                    | -4.42 |
| FXYP1     | FXYP domain containing ion transport regulator 1       | -4.43 |
| JCHAIN    | joining chain of multimeric IgA and IgM                | -4.44 |
| CHRNA4    | cholinergic receptor nicotinic alpha 4 subunit         | -4.47 |
| IGKV3-15  | immunoglobulin kappa variable 3-15                     | -4.47 |
| IGKV2-30  | immunoglobulin kappa variable 2-30                     | -4.48 |
| IGHV4-59  | immunoglobulin heavy variable 4-59                     | -4.49 |
| IGKV2-28  | immunoglobulin kappa variable 2-28                     | -4.5  |
| FOSB      | FosB proto-oncogene, AP-1 transcription factor subunit | -4.51 |
| IGHV3-21  | immunoglobulin heavy variable 3-21                     | -4.52 |
| IGHV3-23  | immunoglobulin heavy variable 3-23                     | -4.52 |
| CYP4A22   | cytochrome P450 family 4 subfamily A member 22         | -4.53 |
| GCGR      | glucagon receptor                                      | -4.53 |
| CYP2B6    | cytochrome P450 family 2 subfamily B member 6          | -4.54 |
| ADRA1A    | adrenoceptor alpha 1A                                  | -4.55 |
| IGLV2-11  | immunoglobulin lambda variable 2-11                    | -4.56 |
| IGLV2-14  | immunoglobulin lambda variable 2-14                    | -4.56 |
| HGFAC     | HGF activator                                          | -4.58 |
| C9        | complement C9                                          | -4.6  |
| CYP4A11   | cytochrome P450 family 4 subfamily A member 11         | -4.62 |
| LINC01979 | long intergenic non-protein coding RNA 1979            | -4.62 |
| PRSS8     | serine protease 8                                      | -4.62 |
| FAM180A   | family with sequence similarity 180 member A           | -4.63 |
| HAO2      | hydroxyacid oxidase 2                                  | -4.63 |

|                          |                                                                |       |
|--------------------------|----------------------------------------------------------------|-------|
| IGHV3-7                  | immunoglobulin heavy variable 3-7                              | -4.63 |
| CYP3A4                   | cytochrome P450 family 3 subfamily A member 4                  | -4.65 |
| MT1M                     | metallothionein 1M                                             | -4.67 |
| IGKV1-12                 | immunoglobulin kappa variable 1-12                             | -4.68 |
| HSD17B13                 | hydroxysteroid 17-beta dehydrogenase 13                        | -4.69 |
| FREM2                    | FRAS1 related extracellular matrix 2                           | -4.7  |
| CCBE1                    | collagen and calcium binding EGF domains 1                     | -4.71 |
| GGT6                     | gamma-glutamyltransferase 6                                    | -4.71 |
| PCK1                     | phosphoenolpyruvate carboxykinase 1                            | -4.72 |
| CYP2A6 (includes others) | cytochrome P450 family 2 subfamily A member 6                  | -4.73 |
| CHST4                    | carbohydrate sulfotransferase 4                                | -4.74 |
| C7                       | complement C7                                                  | -4.8  |
| SLC22A1                  | solute carrier family 22 member 1                              | -4.82 |
| CYP26A1                  | cytochrome P450 family 26 subfamily A member 1                 | -4.89 |
| CNDP1                    | carnosine dipeptidase 1                                        | -4.9  |
| ANXA8/ANXA8L1            | annexin A8 like 1                                              | -4.92 |
| BMPER                    | BMP binding endothelial regulator                              | -4.97 |
| RPS6KA6                  | ribosomal protein S6 kinase A6                                 | -5    |
| ASPG                     | asparaginase                                                   | -5.08 |
| HHIP                     | hedgehog interacting protein                                   | -5.08 |
| IGKV1-6                  | immunoglobulin kappa variable 1-6                              | -5.12 |
| DPT                      | dermatopontin                                                  | -5.14 |
| LPA                      | lipoprotein(a)                                                 | -5.14 |
| SLC6A11                  | solute carrier family 6 member 11                              | -5.14 |
| IGF2                     | insulin like growth factor 2                                   | -5.17 |
| IGFALS                   | insulin like growth factor binding protein acid labile subunit | -5.21 |
| COLEC10                  | collectin subfamily member 10                                  | -5.31 |
| UROC1                    | urocanate hydratase 1                                          | -5.35 |
| CYP3A7-CYP3A51P          | CYP3A7-CYP3A51P readthrough                                    | -5.4  |
| CXCL14                   | C-X-C motif chemokine ligand 14                                | -5.42 |
| IGF2-AS                  | IGF2 antisense RNA                                             | -5.42 |
| FAM83F                   | family with sequence similarity 83 member F                    | -5.48 |
| GRHL2                    | grainyhead like transcription factor 2                         | -5.5  |
| SLC25A47                 | solute carrier family 25 member 47                             | -5.65 |
| GLS2                     | glutaminase 2                                                  | -5.69 |
| FCN3                     | ficolin 3                                                      | -5.78 |
| LINC01093                | long intergenic non-protein coding RNA 1093                    | -5.82 |
| SPP2                     | secreted phosphoprotein 2                                      | -5.85 |
| SLC6A19                  | solute carrier family 6 member 19                              | -5.87 |
| ESRP1                    | epithelial splicing regulatory protein 1                       | -5.91 |
| CYP1A2                   | cytochrome P450 family 1 subfamily A member 2                  | -5.98 |
| CD5L                     | CD5 molecule like                                              | -6.04 |
| SYT9                     | synaptotagmin 9                                                | -6.1  |
| NDST3                    | N-deacetylase and N-sulfotransferase 3                         | -6.15 |
| CRHBP                    | corticotropin releasing hormone binding protein                | -6.17 |
| HAMP                     | hepcidin antimicrobial peptide                                 | -6.17 |
| BMP10                    | bone morphogenetic protein 10                                  | -6.24 |
| MARCO                    | macrophage receptor with collagenous structure                 | -6.25 |
| CLEC1B                   | C-type lectin domain family 1 member B                         | -6.28 |
| STAB2                    | stabilin 2                                                     | -6.36 |
| SLC5A1                   | solute carrier family 5 member 1                               | -6.39 |
| SFRP5                    | secreted frizzled related protein 5                            | -6.4  |
| CLEC4G                   | C-type lectin domain family 4 member G                         | -6.68 |
| LINC01488                | long intergenic non-protein coding RNA 1488                    | -6.69 |
| FCN2                     | ficolin 2                                                      | -7.32 |
| GDF2                     | growth differentiation factor 2                                | -7.6  |

|        |                                        |       |
|--------|----------------------------------------|-------|
| CLEC4M | C-type lectin domain family 4 member M | -8.06 |
| IGF2   | insulin like growth factor 2           | -8.29 |

**Table S3.** Immune genes differentially expressed in HCV-HCC.

| Gene symbol | Gene title                                                                        | Fold change |
|-------------|-----------------------------------------------------------------------------------|-------------|
| CFHR5       | complement factor H-related 5                                                     | 2.06        |
| IL27        | interleukin 27                                                                    | 1.67        |
| PSMD4       | proteasome (prosome, macropain) 26S subunit, non-ATPase, 4                        | 1.34        |
| KLHL13      | kelch-like family member 13                                                       | 1.23        |
| IRF6        | interferon regulatory factor 6                                                    | 1.03        |
| S100A10     | S100 calcium binding protein A10                                                  | 1.03        |
| TNFSF4      | tumor necrosis factor (ligand) superfamily, member 4                              | 1.02        |
| MICB        | MHC class I polypeptide-related sequence B                                        | 1.01        |
| CD3E        | CD3e molecule, epsilon (CD3-TCR complex)                                          | -1.00       |
| NFATC2      | nuclear factor of activated T-cells, cytoplasmic, calcineurin-dependent 2         | -1.01       |
| IL17RE      | interleukin 17 receptor E                                                         | -1.01       |
| GBP1        | guanylate binding protein 1, interferon-inducible                                 | -1.02       |
| ABR         | active BCR-related                                                                | -1.02       |
| NCF4        | neutrophil cytosolic factor 4, 40kDa                                              | -1.02       |
| POU2F2      | POU class 2 homeobox 2                                                            | -1.03       |
| LILRB4      | leukocyte immunoglobulin-like receptor, subfamily B, member 4                     | -1.04       |
| TNFSF13     | tumor necrosis factor (ligand) superfamily, member 13                             | -1.04       |
| HAVCR2      | hepatitis A virus cellular receptor 2 (TIM3)                                      | -1.07       |
| C3AR1       | complement component 3a receptor 1                                                | -1.07       |
| TLR4        | toll-like receptor 4                                                              | -1.07       |
| SIGLEC1     | sialic acid binding Ig-like lectin 1, sialoadhesin                                | -1.07       |
| LILRB3      | leukocyte immunoglobulin-like receptor, subfamily B, member 3                     | -1.08       |
| FCER1G      | Fc fragment of IgE, high affinity I, receptor for; gamma polypeptide              | -1.09       |
| FOLR2       | folate receptor 2 (fetal)                                                         | -1.09       |
| TNFRSF10A   | tumor necrosis factor receptor superfamily, member 10a                            | -1.09       |
| LILRA6      | leukocyte immunoglobulin-like receptor, subfamily A (with TM domain), member 6    | -1.10       |
| CD55        | CD55 molecule, decay accelerating factor for complement (Cromer blood group)      | -1.10       |
| IL2RB       | interleukin 2 receptor, beta                                                      | -1.11       |
| CD72        | CD72 molecule                                                                     | -1.11       |
| KLRK1       | killer cell lectin-like receptor subfamily K, member 1                            | -1.12       |
| BCL11B      | B-cell CLL/lymphoma 11B (zinc finger protein)                                     | -1.13       |
| HLA-DRB1    | major histocompatibility complex, class II, DR beta 1                             | -1.14       |
| S100A4      | S100 calcium binding protein A4                                                   | -1.14       |
| CCL14       | chemokine (C-C motif) ligand 14                                                   | -1.15       |
| HLA-DPA1    | major histocompatibility complex, class II, DP alpha 1                            | -1.15       |
| CD7         | CD7 molecule                                                                      | -1.16       |
| FCGR3A      | Fc fragment of IgG, low affinity IIIa, receptor (CD16a)                           | -1.16       |
| HRH2        | histamine receptor H2                                                             | -1.16       |
| IL4R        | interleukin 4 receptor                                                            | -1.17       |
| MS4A4A      | membrane-spanning 4-domains, subfamily A, member 4A                               | -1.17       |
| HLA-DRA     | major histocompatibility complex, class II, DR alpha                              | -1.17       |
| CCL5        | chemokine (C-C motif) ligand 5                                                    | -1.18       |
| CYBB        | cytochrome b-245, beta polypeptide                                                | -1.19       |
| C1QA        | complement component 1, q subcomponent, A chain                                   | -1.19       |
| CD274       | CD274 molecule (PD-L1)                                                            | -1.19       |
| CD53        | CD53 molecule                                                                     | -1.19       |
| HLA-DQA1    | major histocompatibility complex, class II, DQ alpha 1                            | -1.19       |
| HLA-DPB1    | major histocompatibility complex, class II, DP beta 1                             | -1.20       |
| PDCD1LG2    | programmed cell death 1 ligand 2 (PD-L2)                                          | -1.20       |
| GCA         | grancalcin, EF-hand calcium binding protein                                       | -1.20       |
| SELPLG      | selectin P ligand                                                                 | -1.20       |
| CD27        | Tumor Necrosis Factor Receptor Superfamily, Member 7                              | -1.20       |
| LY86        | lymphocyte antigen 86                                                             | -1.21       |
| LCP2        | lymphocyte cytosolic protein 2 (SH2 domain containing leukocyte protein of 76kDa) | -1.21       |

|          |                                                                                     |       |
|----------|-------------------------------------------------------------------------------------|-------|
| NCF1C    | neutrophil cytosolic factor 1C pseudogene                                           | -1.21 |
| ITGA4    | integrin, alpha 4 (antigen CD49D, alpha 4 subunit of VLA-4 receptor)                | -1.22 |
| TNFRSF1B | tumor necrosis factor receptor superfamily, member 1B                               | -1.23 |
| C1QC     | complement component 1, q subcomponent, C chain                                     | -1.23 |
| CCL3     | chemokine (C-C motif) ligand 3                                                      | -1.24 |
| LY75     | lymphocyte antigen 75                                                               | -1.24 |
| CD244    | CD244 molecule, natural killer cell receptor 2B4                                    | -1.24 |
| LAT2     | linker for activation of T cells family, member 2                                   | -1.24 |
| C8B      | complement component 8, beta polypeptide                                            | -1.26 |
| CD14     | Monocyte Differentiation Antigen CD14                                               | -1.27 |
| CD8A     | T-Cell Surface Glycoprotein CD8 Alpha Chain                                         | -1.27 |
| C1R      | complement component 1, r subcomponent                                              | -1.27 |
| C1QB     | complement component 1, q subcomponent, B chain                                     | -1.27 |
| SEMA4D   | sema domain, immunoglobulin domain (Ig), (semaphorin) 4D                            | -1.28 |
| TNFSF13B | tumor necrosis factor (ligand) superfamily, member 13b                              | -1.30 |
| HPSE     | heparanase                                                                          | -1.32 |
| NFKBIZ   | nuclear factor of kappa light polypeptide gene enhancer in B-cells inhibitor, zeta  | -1.32 |
| CD8B     | T-Cell Surface Glycoprotein CD8 Beta Chain                                          | -1.32 |
| CD96     | CD96 molecule                                                                       | -1.33 |
| CD79B    | CD79b molecule, immunoglobulin-associated beta                                      | -1.33 |
| NCF1     | neutrophil cytosolic factor 1                                                       | -1.33 |
| IL15RA   | interleukin 15 receptor, alpha                                                      | -1.34 |
| CD5      | CD5 molecule                                                                        | -1.35 |
| EBI3     | Epstein-Barr virus induced 3 (Interleukin-27 Subunit Beta)                          | -1.35 |
| KLHL6    | kelch-like family member 6                                                          | -1.36 |
| DAPP1    | dual adaptor of phosphotyrosine and 3-phosphoinositides                             | -1.36 |
| CCR1     | chemokine (C-C motif) receptor 1                                                    | -1.38 |
| IL1RAP   | interleukin 1 receptor accessory protein                                            | -1.38 |
| CCR7     | chemokine (C-C motif) receptor 7                                                    | -1.38 |
| PTPRC    | protein tyrosine phosphatase, receptor type, C                                      | -1.39 |
| CFD      | complement factor D (adipsin)                                                       | -1.39 |
| KLRB1    | killer cell lectin-like receptor subfamily B, member 1                              | -1.39 |
| CYBA     | cytochrome b-245, alpha polypeptide                                                 | -1.40 |
| GATA3    | GATA binding protein 3                                                              | -1.40 |
| AOAH     | acyloxyacyl hydrolase (neutrophil)                                                  | -1.40 |
| LILRB1   | leukocyte immunoglobulin-like receptor, subfamily B, member 1                       | -1.42 |
| TIGIT    | T cell immunoreceptor with Ig and ITIM domains                                      | -1.42 |
| NCF1B    | neutrophil cytosolic factor 1B pseudogene                                           | -1.42 |
| CSF1R    | colony stimulating factor 1 receptor                                                | -1.43 |
| LILRB2   | leukocyte immunoglobulin-like receptor, subfamily B, member 2                       | -1.45 |
| PROCR    | protein C receptor, endothelial                                                     | -1.46 |
| MRC2     | mannose receptor, C type 2 (CD280)                                                  | -1.46 |
| NFKBID   | nuclear factor of kappa light polypeptide gene enhancer in B-cells inhibitor, delta | -1.47 |
| STAT4    | signal transducer and activator of transcription 4                                  | -1.48 |
| SIGLEC7  | sialic acid binding Ig-like lectin 7                                                | -1.49 |
| HLA-DOA  | major histocompatibility complex, class II, DO alpha                                | -1.50 |
| ISG20    | interferon stimulated exonuclease gene 20kDa                                        | -1.51 |
| TNFSF8   | tumor necrosis factor (ligand) superfamily, member 8                                | -1.51 |
| FCRL3    | Fc receptor-like 3                                                                  | -1.51 |
| TLR2     | toll-like receptor 2                                                                | -1.53 |
| S100A6   | S100 calcium binding protein A6                                                     | -1.54 |
| TRAT1    | T cell receptor associated transmembrane adaptor 1                                  | -1.55 |
| IRF8     | interferon regulatory factor 8                                                      | -1.55 |
| IFI16    | interferon, gamma-inducible protein 16                                              | -1.58 |
| SIGLEC10 | sialic acid binding Ig-like lectin 10                                               | -1.60 |
| IL2RA    | interleukin 2 receptor, alpha                                                       | -1.60 |
| IRAK3    | interleukin-1 receptor-associated kinase 3                                          | -1.60 |

|           |                                                                                |       |
|-----------|--------------------------------------------------------------------------------|-------|
| CD86      | T-Lymphocyte Activation Antigen CD86                                           | -1.61 |
| NAMPT     | nicotinamide phosphoribosyltransferase                                         | -1.62 |
| IL18R1    | interleukin 18 receptor 1                                                      | -1.63 |
| GZMK      | granzyme K (granzyme 3; tryptase II)                                           | -1.63 |
| CCL4      | chemokine (C-C motif) ligand 4                                                 | -1.63 |
| IL21R     | interleukin 21 receptor                                                        | -1.64 |
| ITK       | IL2-inducible T-cell kinase                                                    | -1.65 |
| LILRB5    | leukocyte immunoglobulin-like receptor, subfamily B, member 5                  | -1.65 |
| CD4       | CD4 molecule                                                                   | -1.65 |
| LILRA1    | leukocyte immunoglobulin-like receptor, subfamily A (with TM domain), member 1 | -1.65 |
| C8A       | complement component 8, alpha polypeptide                                      | -1.66 |
| FCGR1B    | Fc fragment of IgG, high affinity Ib, receptor (CD64)                          | -1.66 |
| SIGLEC11  | sialic acid binding Ig-like lectin 11                                          | -1.69 |
| NCR3LG1   | natural killer cell cytotoxicity receptor 3 ligand 1                           | -1.70 |
| TNFRSF10D | tumor necrosis factor receptor superfamily, member 10d                         | -1.71 |
| CXCR4     | chemokine (C-X-C motif) receptor 4                                             | -1.72 |
| LY9       | lymphocyte antigen 9                                                           | -1.72 |
| TGFB3     | transforming growth factor, beta 3                                             | -1.72 |
| DEFB1     | defensin, beta 1                                                               | -1.77 |
| IGLV6-57  | immunoglobulin lambda variable 6-57                                            | -1.77 |
| CD69      | CD69 molecule                                                                  | -1.78 |
| IL18RAP   | interleukin 18 receptor accessory protein                                      | -1.79 |
| TNFRSF10C | tumor necrosis factor receptor superfamily, member 10c                         | -1.80 |
| TLR10     | toll-like receptor 10                                                          | -1.82 |
| TAGAP     | T-cell activation RhoGTPase activating protein                                 | -1.86 |
| MNDA      | myeloid cell nuclear differentiation antigen                                   | -1.88 |
| C5AR1     | complement component 5a receptor 1                                             | -1.90 |
| IL18      | interleukin 18                                                                 | -1.90 |
| CXCL3     | chemokine (C-X-C motif) ligand 3                                               | -1.92 |
| MRC1      | mannose receptor, C type 1 (CD206)                                             | -1.97 |
| NFAM1     | NFAT activating protein with ITAM motif 1                                      | -1.98 |
| VSIG4     | V-set and immunoglobulin domain containing 4                                   | -2.00 |
| APOBEC3C  | apolipoprotein B mRNA editing enzyme, catalytic polypeptide-like 3C            | -2.00 |
| S100A9    | S100 calcium binding protein A9                                                | -2.01 |
| CFP       | complement factor properdin                                                    | -2.02 |
| CD163     | Macrophage-Associated Antigen                                                  | -2.02 |
| NFATC1    | nuclear factor of activated T-cells, cytoplasmic, calcineurin-dependent 1      | -2.06 |
| CD1D      | CD1d molecule                                                                  | -2.06 |
| CCL22     | chemokine (C-C motif) ligand 22                                                | -2.11 |
| TNFRSF21  | tumor necrosis factor receptor superfamily, member 21                          | -2.11 |
| CR1       | complement component (3b/4b) receptor 1 (Knops blood group)                    | -2.12 |
| FCRL1     | Fc receptor-like 1                                                             | -2.13 |
| LILRA2    | leukocyte immunoglobulin-like receptor, subfamily A (with TM domain), member 2 | -2.15 |
| FCER1A    | Fc fragment of IgE, high affinity I, receptor for; alpha polypeptide           | -2.20 |
| SEMA3C    | sema domain, immunoglobulin domain (Ig), (semaphorin) 3C                       | -2.21 |
| ITGB6     | integrin, beta 6                                                               | -2.33 |
| IL7R      | interleukin 7 receptor                                                         | -2.33 |
| TNFSF11   | tumor necrosis factor (ligand) superfamily, member 11                          | -2.35 |
| TNFRSF13C | tumor necrosis factor receptor superfamily, member 13C                         | -2.36 |
| IGHM      | immunoglobulin heavy constant mu                                               | -2.40 |
| CCR4      | chemokine (C-C motif) receptor 4                                               | -2.43 |
| MZB1      | marginal zone B and B1 cell-specific protein                                   | -2.44 |
| IGHG2     | immunoglobulin heavy constant gamma 2 (G2m marker)                             | -2.46 |
| TNFRSF11B | tumor necrosis factor receptor superfamily, member 11b                         | -2.46 |
| LILRA5    | leukocyte immunoglobulin-like receptor, subfamily A (with TM domain), member 5 | -2.48 |
| IGHD      | immunoglobulin heavy constant delta                                            | -2.48 |
| IGHA1     | immunoglobulin heavy constant alpha 1                                          | -2.51 |

|          |                                                                                |       |
|----------|--------------------------------------------------------------------------------|-------|
| APOBEC3A | apolipoprotein B mRNA editing enzyme, catalytic polypeptide-like 3A            | -2.51 |
| RGS2     | regulator of G-protein signaling 2                                             | -2.52 |
| KIAA0125 | KIAA0125 (Family With Sequence Similarity 30 Member A)                         | -2.53 |
| S100A8   | S100 calcium binding protein A8                                                | -2.58 |
| MS4A1    | membrane-spanning 4-domains, subfamily A, member 1 (CD20)                      | -2.58 |
| SELP     | selectin P (granule membrane protein 140kDa, antigen CD62)                     | -2.59 |
| POU2AF1  | POU class 2 associating factor 1                                               | -2.60 |
| FCGR3B   | Fc fragment of IgG, low affinity IIIb, receptor (CD16b)                        | -2.62 |
| IGHG3    | immunoglobulin heavy constant gamma 3 (G3m marker)                             | -2.76 |
| IRF4     | interferon regulatory factor 4                                                 | -2.80 |
| CXCL12   | chemokine (C-X-C motif) ligand 12 (Stromal cell-derived factor 1, SDF1)        | -2.81 |
| IGHA2    | immunoglobulin heavy constant alpha 2 (A2m marker)                             | -2.82 |
| CD79A    | CD79a molecule, immunoglobulin-associated alpha                                | -2.83 |
| FCRL5    | Fc receptor-like 5                                                             | -2.84 |
| CXCL5    | chemokine (C-X-C motif) ligand 5                                               | -2.91 |
| CXCL8    | chemokine (C-X-C motif) ligand 8                                               | -2.93 |
| IGHV3-23 | immunoglobulin heavy variable 3-23                                             | -2.95 |
| IGLL5    | immunoglobulin lambda-like polypeptide 5                                       | -3.01 |
| FPR1     | formyl peptide receptor 1                                                      | -3.01 |
| TGFA     | transforming growth factor, alpha                                              | -3.11 |
| IGKC     | immunoglobulin kappa constant                                                  | -3.12 |
| IGLC1    | immunoglobulin lambda constant 1 (Mcg marker)                                  | -3.13 |
| IGKV1-5  | Immunoglobulin Kappa Variable 1-5                                              | -3.14 |
| CCL2     | chemokine (C-C motif) ligand 2                                                 | -3.22 |
| CD5L     | CD5 molecule-like                                                              | -3.23 |
| LY6E     | lymphocyte antigen 6 complex, locus E                                          | -3.34 |
| C7       | complement component 7                                                         | -3.36 |
| IGHG1    | immunoglobulin heavy constant gamma 1 (G1m marker)                             | -3.37 |
| IL1B     | interleukin 1, beta                                                            | -3.38 |
| CXCR2    | chemokine (C-X-C motif) receptor 2                                             | -3.53 |
| IL6      | interleukin 6                                                                  | -3.57 |
| NCAM1    | neural cell adhesion molecule 1 (CD56)                                         | -3.58 |
| CCL21    | chemokine (C-C motif) ligand 21                                                | -3.59 |
| CXCL1    | chemokine (C-X-C motif) ligand 1 (melanoma growth stimulating activity, alpha) | -3.61 |
| IGLV3-21 | Immunoglobulin Lambda Variable 3-21                                            | -3.62 |
| IL1RL1   | interleukin 1 receptor-like 1                                                  | -3.63 |
| IGLV1-44 | immunoglobulin lambda variable 1-44                                            | -3.63 |
| TIMD4    | T-cell immunoglobulin and mucin domain containing 4                            | -3.65 |
| CCL19    | chemokine (C-C motif) ligand 19                                                | -3.96 |
| IGHG4    | immunoglobulin heavy constant gamma 4 (G4m marker)                             | -4.04 |
| CXCL14   | chemokine (C-X-C motif) ligand 14                                              | -4.43 |
| C9       | complement component 9                                                         | -4.91 |
| SEMA3E   | sema domain, immunoglobulin domain (Ig), (semaphorin) 3E                       | -5.05 |
| IL20RA   | interleukin 20 receptor, alpha                                                 | -5.13 |
| CLEC4G   | C-type lectin domain family 4, member G                                        | -5.58 |
| CLEC4M   | C-type lectin domain family 4, member M                                        | -5.60 |
| CXCL6    | chemokine (C-X-C motif) ligand 6                                               | -5.64 |
| VTCN1    | V-set domain containing T cell activation inhibitor 1                          | -6.42 |



**Table S4.** Immune genes differentially expressed in HBV-HCC.

| Gene symbol   | Gene title                                                                         | Fold change |
|---------------|------------------------------------------------------------------------------------|-------------|
| TREM2         | triggering receptor expressed on myeloid cells 2                                   | 3.08        |
| CCL20         | chemokine (C-C motif) ligand 20                                                    | 2.77        |
| CD109         | CD109 molecule                                                                     | 2.69        |
| GIMAP1-GIMAP5 | GIMAP1-GIMAP5 readthrough                                                          | 2.35        |
| TRIM45        | tripartite motif containing 45                                                     | 2.16        |
| ITGA2         | integrin, alpha 2 (CD49B, alpha 2 subunit of VLA-2 receptor)                       | 1.96        |
| NOS2          | nitric oxide synthase 2, inducible                                                 | 1.87        |
| C1QTNF3       | C1q and tumor necrosis factor related protein 3                                    | 1.85        |
| SQSTM1        | sequestosome 1                                                                     | 1.85        |
| HMGA1         | high mobility group AT-hook 1                                                      | 1.78        |
| S100A10       | S100 calcium binding protein A10                                                   | 1.71        |
| APOBEC3B      | apolipoprotein B mRNA editing enzyme, catalytic polypeptide-like 3B                | 1.66        |
| CD34          | CD34 molecule                                                                      | 1.65        |
| TNFRSF4       | tumor necrosis factor receptor superfamily, member 4                               | 1.63        |
| VNN2          | vanin 2                                                                            | 1.52        |
| CTSA          | cathepsin A                                                                        | 1.49        |
| S100A11       | S100 calcium binding protein A11                                                   | 1.42        |
| TALDO1        | transaldolase 1                                                                    | 1.34        |
| CTSC          | cathepsin C                                                                        | 1.30        |
| LOXL2         | lysyl oxidase-like 2                                                               | 1.18        |
| MIF           | macrophage migration inhibitory factor (glycosylation-inhibiting factor)           | 1.18        |
| PSMD4         | proteasome (prosome, macropain) 26S subunit, non-ATPase, 4                         | 1.15        |
| MICB          | MHC class I polypeptide-related sequence B                                         | 1.14        |
| SEMA4F        | semaphorin 4F                                                                      | 1.12        |
| IKBKE         | inhibitor of kappa light polypeptide gene enhancer in B-cells, kinase epsilon      | 1.10        |
| TNFSF4        | tumor necrosis factor (ligand) superfamily, member 4                               | 1.10        |
| S100A6        | S100 calcium binding protein A6                                                    | 1.00        |
| CFH           | complement factor H                                                                | -1.03       |
| CFI           | complement factor I                                                                | -1.04       |
| IFNAR1        | interferon (alpha, beta and omega) receptor 1                                      | -1.07       |
| IL6ST         | interleukin 6 signal transducer                                                    | -1.07       |
| CTSW          | cathepsin W                                                                        | -1.09       |
| FAS           | Fas Cell Surface Death Receptor (CD95, TNFRSF6)                                    | -1.09       |
| GIMAP5        | GTPase, IMAP family member 5                                                       | -1.09       |
| ISG20         | interferon stimulated exonuclease gene 20kDa                                       | -1.10       |
| CCL5          | chemokine (C-C motif) ligand 5                                                     | -1.12       |
| IFITM1        | interferon induced transmembrane protein 1                                         | -1.12       |
| NKG7          | natural killer cell granule protein 7                                              | -1.14       |
| TBX21         | T-Cell-Specific T-Box Transcription Factor T-Bet (T-Box21)                         | -1.14       |
| TIGIT         | T cell immunoreceptor with Ig and ITIM domains                                     | -1.14       |
| LILRB2        | leukocyte immunoglobulin-like receptor, subfamily B, member 2                      | -1.16       |
| CTSO          | cathepsin O                                                                        | -1.18       |
| C1RL          | complement component 1, r subcomponent-like                                        | -1.20       |
| SIGLEC7       | sialic acid binding Ig-like lectin 7                                               | -1.22       |
| CD27          | Tumor Necrosis Factor Receptor Superfamily, Member 7                               | -1.25       |
| IL4R          | interleukin 4 receptor                                                             | -1.25       |
| NFKBIZ        | nuclear factor of kappa light polypeptide gene enhancer in B-cells inhibitor, zeta | -1.25       |
| TLR4          | toll-like receptor 4                                                               | -1.26       |
| BLNK          | B-cell linker                                                                      | -1.27       |
| LILRB1        | leukocyte immunoglobulin-like receptor, subfamily B, member 1                      | -1.32       |
| TGFBR3        | transforming growth factor, beta receptor III                                      | -1.32       |
| CCL4          | chemokine (C-C motif) ligand 4                                                     | -1.34       |
| CD4           | CD4 molecule                                                                       | -1.35       |
| PDCD1LG2      | programmed cell death 1 ligand 2 (PD-L2)                                           | -1.36       |

|             |                                                                                |       |
|-------------|--------------------------------------------------------------------------------|-------|
| CCL3        | chemokine (C-C motif) ligand 3                                                 | -1.37 |
| LY9         | lymphocyte antigen 9                                                           | -1.38 |
| KLRB1       | killer cell lectin-like receptor subfamily B, member 1                         | -1.40 |
| IRF8        | interferon regulatory factor 8                                                 | -1.41 |
| C5          | complement component 5                                                         | -1.44 |
| TNFRSF10C   | tumor necrosis factor receptor superfamily, member 10c, decoy                  | -1.44 |
| CD14        | Monocyte Differentiation Antigen CD14                                          | -1.45 |
| IFNLR1      | interferon, lambda receptor 1                                                  | -1.45 |
| KLHL3       | kelch-like family member 3                                                     | -1.45 |
| C5AR1       | complement component 5a receptor 1                                             | -1.47 |
| GBP1        | guanylate binding protein 1, interferon-inducible                              | -1.49 |
| PRF1        | perforin 1 (pore forming protein)                                              | -1.51 |
| TRGC2       | T cell receptor gamma constant 2                                               | -1.53 |
| TIAM1       | T-cell lymphoma invasion and metastasis 1                                      | -1.55 |
| CCL15-CCL14 | CCL15-CCL14 readthrough (NMD candidate)                                        | -1.57 |
| CD160       | CD160 molecule                                                                 | -1.58 |
| STAT4       | signal transducer and activator of transcription 4                             | -1.58 |
| C3          | complement component 3                                                         | -1.59 |
| IL2RB       | interleukin 2 receptor, beta                                                   | -1.62 |
| CD69        | CD69 molecule                                                                  | -1.63 |
| LAG3        | lymphocyte-activation gene 3                                                   | -1.63 |
| C1R         | complement component 1, r subcomponent                                         | -1.64 |
| IL18RAP     | interleukin 18 receptor accessory protein                                      | -1.69 |
| TGFA        | transforming growth factor, alpha                                              | -1.70 |
| CFD         | complement factor D (adipsin)                                                  | -1.73 |
| CISH        | cytokine inducible SH2-containing protein                                      | -1.73 |
| SOCS3       | suppressor of cytokine signaling 3                                             | -1.73 |
| ITK         | IL2-inducible T-cell kinase                                                    | -1.74 |
| LILRA2      | leukocyte immunoglobulin-like receptor, subfamily A (with TM domain), member 2 | -1.74 |
| GZMK        | granzyme K (granzyme 3; tryptase II)                                           | -1.76 |
| TEK         | TEK receptor tyrosine kinase                                                   | -1.77 |
| TGFB3       | transforming growth factor, beta 3                                             | -1.77 |
| CD1D        | CD1d molecule                                                                  | -1.78 |
| FCRLA       | Fc receptor-like A                                                             | -1.79 |
| EOMES       | eomesodermin                                                                   | -1.81 |
| FCGR2B      | Fc fragment of IgG, low affinity IIb, receptor (CD32)                          | -1.83 |
| IL33        | interleukin 33                                                                 | -1.83 |
| CD163       | Scavenger Receptor Cysteine-Rich Type 1 Protein M130                           | -1.85 |
| IL1RN       | interleukin 1 receptor antagonist                                              | -1.86 |
| LILRA1      | leukocyte immunoglobulin-like receptor, subfamily A (with TM domain), member 1 | -1.88 |
| TNFRSF13C   | tumor necrosis factor receptor superfamily, member 13C                         | -1.96 |
| TRAT1       | T cell receptor associated transmembrane adaptor 1                             | -1.96 |
| S100A8      | S100 calcium binding protein A8                                                | -2.00 |
| TNFSF11     | tumor necrosis factor (ligand) superfamily, member 11                          | -2.00 |
| IL18R1      | interleukin 18 receptor 1                                                      | -2.01 |
| TNFRSF10D   | tumor necrosis factor receptor superfamily, member 10d, decoy                  | -2.01 |
| CD244       | CD244 molecule, natural killer cell receptor 2B4                               | -2.03 |
| FPR1        | formyl peptide receptor 1                                                      | -2.04 |
| C8A         | complement component 8, alpha polypeptide                                      | -2.06 |
| CCR7        | chemokine (C-C motif) receptor 7                                               | -2.08 |
| KLRD1       | killer cell lectin-like receptor subfamily D, member 1                         | -2.12 |
| CR1         | complement component (3b/4b) receptor 1 (Knops blood group)                    | -2.22 |
| MRC1        | mannose receptor, C type 1 (CD206)                                             | -2.25 |
| PAX5        | paired box 5                                                                   | -2.25 |
| IL1RAP      | interleukin 1 receptor accessory protein                                       | -2.28 |
| ITGAD       | integrin, alpha D                                                              | -2.29 |
| IGHD        | immunoglobulin heavy constant delta                                            | -2.30 |

|          |                                                                                |       |
|----------|--------------------------------------------------------------------------------|-------|
| FCRL3    | Fc receptor-like 3                                                             | -2.31 |
| LILRB5   | leukocyte immunoglobulin-like receptor, subfamily B, member 5                  | -2.35 |
| CD8A     | T-Cell Surface Glycoprotein CD8 Alpha Chain                                    | -2.38 |
| LILRA5   | leukocyte immunoglobulin-like receptor, subfamily A (with TM domain), member 5 | -2.39 |
| SIGLEC11 | sialic acid binding Ig-like lectin 11                                          | -2.39 |
| LY6E     | lymphocyte antigen 6 complex, locus E                                          | -2.44 |
| CCL14    | chemokine (C-C motif) ligand 14                                                | -2.49 |
| IRF4     | interferon regulatory factor 4                                                 | -2.49 |
| POU2AF1  | POU class 2 associating factor 1                                               | -2.61 |
| C8B      | complement component 8, beta polypeptide                                       | -2.62 |
| CFHR3    | complement factor H-related 3                                                  | -2.66 |
| CXCL2    | chemokine (C-X-C motif) ligand 2                                               | -2.67 |
| FCRL1    | Fc receptor-like 1                                                             | -2.74 |
| VNN1     | vanin 1                                                                        | -2.78 |
| SELP     | selectin P (granule membrane protein 140kDa, antigen CD62)                     | -2.84 |
| MZB1     | marginal zone B and B1 cell-specific protein                                   | -2.89 |
| C6       | complement component 6                                                         | -2.94 |
| CD79A    | CD79a molecule, immunoglobulin-associated alpha                                | -2.94 |
| MS4A1    | membrane-spanning 4-domains, subfamily A, member 1 (CD20)                      | -2.95 |
| HPX      | hemopexin                                                                      | -3.07 |
| FCRL2    | Fc receptor-like 2                                                             | -3.14 |
| CCL19    | chemokine (C-C motif) ligand 19                                                | -3.18 |
| IL13RA2  | interleukin 13 receptor, alpha 2                                               | -3.18 |
| IGLV6-57 | immunoglobulin lambda variable 6-57                                            | -3.23 |
| CXCR5    | chemokine (C-X-C motif) receptor 5                                             | -3.35 |
| IGHA2    | immunoglobulin heavy constant alpha 2 (A2m marker)                             | -3.51 |
| CXCL12   | chemokine (C-X-C motif) ligand 12 (Stromal cell-derived factor 1, SDF1)        | -3.53 |
| IGHG2    | immunoglobulin heavy constant gamma 2 (G2m marker)                             | -3.58 |
| FCRL5    | Fc receptor-like 5                                                             | -3.60 |
| CFP      | complement factor properdin                                                    | -3.62 |
| IDO2     | Indoleamine 2,3-Dioxygenase 2                                                  | -3.62 |
| CCL21    | chemokine (C-C motif) ligand 21                                                | -3.70 |
| SOCS2    | suppressor of cytokine signaling 2                                             | -3.70 |
| IGLC1    | immunoglobulin lambda constant 1 (Mcg marker)                                  | -3.73 |
| IL1RL1   | interleukin 1 receptor-like 1                                                  | -3.77 |
| IGKV1-5  | Immunoglobulin Kappa Variable 1-5                                              | -3.84 |
| IGHA1    | immunoglobulin heavy constant alpha 1                                          | -3.86 |
| IGKC     | immunoglobulin kappa constant                                                  | -4.01 |
| IGHV4-31 | immunoglobulin heavy variable 4-31                                             | -4.05 |
| IGLV1-44 | immunoglobulin lambda variable 1-44                                            | -4.07 |
| IGHM     | immunoglobulin heavy constant mu                                               | -4.14 |
| IGHG4    | immunoglobulin heavy constant gamma 4 (G4m marker)                             | -4.18 |
| IGLV3-21 | Immunoglobulin Lambda Variable 3-21                                            | -4.26 |
| IGHG1    | immunoglobulin heavy constant gamma 1 (G1m marker)                             | -4.27 |
| TIMD4    | T-cell immunoglobulin and mucin domain containing 4                            | -4.31 |
| IGHG3    | immunoglobulin heavy constant gamma 3 (G3m marker)                             | -4.39 |
| IGHV3-23 | immunoglobulin heavy variable 3-23                                             | -4.52 |
| C9       | complement component 9                                                         | -4.60 |
| C7       | complement component 7                                                         | -4.80 |
| CXCL14   | chemokine (C-X-C motif) ligand 14                                              | -5.42 |
| CD5L     | CD5 molecule-like                                                              | -6.04 |
| CLEC4G   | C-type lectin domain family 4, member G                                        | -6.68 |
| CLEC4M   | C-type lectin domain family 4, member M                                        | -8.06 |

**Table S5.** Immune genes uniquely expressed in HCV-HCC.

| Gene symbol | Gene title                                                                        | Fold change |
|-------------|-----------------------------------------------------------------------------------|-------------|
| CFHR5       | complement factor H-related 5                                                     | 2.06        |
| IL27        | interleukin 27                                                                    | 1.67        |
| KLHL13      | kelch-like family member 13                                                       | 1.23        |
| IRF6        | interferon regulatory factor 6                                                    | 1.03        |
| CD3E        | CD3e molecule, epsilon (CD3-TCR complex)                                          | -1.00       |
| IL17RE      | interleukin 17 receptor E                                                         | -1.01       |
| NFATC2      | nuclear factor of activated T-cells, cytoplasmic, calcineurin-dependent 2         | -1.01       |
| ABR         | active BCR-related                                                                | -1.02       |
| NCF4        | neutrophil cytosolic factor 4, 40kDa                                              | -1.02       |
| POU2F2      | POU class 2 homeobox 2                                                            | -1.03       |
| LILRB4      | leukocyte immunoglobulin-like receptor, subfamily B, member 4                     | -1.04       |
| TNFSF13     | tumor necrosis factor (ligand) superfamily, member 13                             | -1.04       |
| C3AR1       | complement component 3a receptor 1                                                | -1.07       |
| HAVCR2      | hepatitis A virus cellular receptor 2 (TIM3)                                      | -1.07       |
| SIGLEC1     | sialic acid binding Ig-like lectin 1, sialoadhesin                                | -1.07       |
| LILRB3      | leukocyte immunoglobulin-like receptor, subfamily B, member 3                     | -1.08       |
| FCER1G      | Fc fragment of IgE, high affinity I, receptor for; gamma polypeptide              | -1.09       |
| FOLR2       | folate receptor 2 (fetal)                                                         | -1.09       |
| TNFRSF10A   | tumor necrosis factor receptor superfamily, member 10a                            | -1.09       |
| CD55        | CD55 molecule, decay accelerating factor for complement (Cromer blood group)      | -1.10       |
| LILRA6      | leukocyte immunoglobulin-like receptor, subfamily A (with TM domain), member 6    | -1.10       |
| CD72        | CD72 molecule                                                                     | -1.11       |
| BCL11B      | B-cell CLL/lymphoma 11B (zinc finger protein)                                     | -1.13       |
| HLA-DRB1    | major histocompatibility complex, class II, DR beta 1                             | -1.14       |
| S100A4      | S100 calcium binding protein A4                                                   | -1.14       |
| HLA-DPA1    | major histocompatibility complex, class II, DP alpha 1                            | -1.15       |
| CD7         | CD7 molecule                                                                      | -1.16       |
| HRH2        | histamine receptor H2                                                             | -1.16       |
| HLA-DRA     | major histocompatibility complex, class II, DR alpha                              | -1.17       |
| MS4A4A      | membrane-spanning 4-domains, subfamily A, member 4A                               | -1.17       |
| C1QA        | complement component 1, q subcomponent, A chain                                   | -1.19       |
| CD274       | CD274 molecule (PD-L1)                                                            | -1.19       |
| CD53        | CD53 molecule                                                                     | -1.19       |
| CYBB        | cytochrome b-245, beta polypeptide                                                | -1.19       |
| HLA-DQA1    | major histocompatibility complex, class II, DQ alpha 1                            | -1.19       |
| GCA         | grancalcin, EF-hand calcium binding protein                                       | -1.20       |
| HLA-DPB1    | major histocompatibility complex, class II, DP beta 1                             | -1.20       |
| IL10RA      | Interleukin 10 Receptor Subunit Alpha (IL-10R1)                                   | -1.20       |
| SELPLG      | selectin P ligand                                                                 | -1.20       |
| LCP2        | lymphocyte cytosolic protein 2 (SH2 domain containing leukocyte protein of 76kDa) | -1.21       |
| LY86        | lymphocyte antigen 86                                                             | -1.21       |
| NCF1C       | neutrophil cytosolic factor 1C pseudogene                                         | -1.21       |
| ITGA4       | integrin, alpha 4 (antigen CD49D, alpha 4 subunit of VLA-4 receptor)              | -1.22       |
| C1QC        | complement component 1, q subcomponent, C chain                                   | -1.23       |
| TNFRSF1B    | tumor necrosis factor receptor superfamily, member 1B                             | -1.23       |
| LAT2        | linker for activation of T cells family, member 2                                 | -1.24       |
| LY75        | lymphocyte antigen 75                                                             | -1.24       |
| C1QB        | complement component 1, q subcomponent, B chain                                   | -1.27       |
| SEMA4D      | semaphorin 4D                                                                     | -1.28       |
| TNFSF13B    | tumor necrosis factor (ligand) superfamily, member 13b                            | -1.30       |
| CD8B        | T-Cell Surface Glycoprotein CD8 Beta Chain                                        | -1.32       |
| HPSE        | heparanase                                                                        | -1.32       |
| CD79B       | CD79b molecule, immunoglobulin-associated beta                                    | -1.33       |
| CD96        | CD96 molecule                                                                     | -1.33       |

|           |                                                                                     |       |
|-----------|-------------------------------------------------------------------------------------|-------|
| NCF1      | neutrophil cytosolic factor 1                                                       | -1.33 |
| IL15RA    | interleukin 15 receptor, alpha                                                      | -1.34 |
| CD5       | CD5 molecule                                                                        | -1.35 |
| EBI3      | Epstein-Barr virus induced 3 (Interleukin-27 Subunit Beta)                          | -1.35 |
| DAPP1     | dual adaptor of phosphotyrosine and 3-phosphoinositides                             | -1.36 |
| KLHL6     | kelch-like family member 6                                                          | -1.36 |
| CCR1      | chemokine (C-C motif) receptor 1                                                    | -1.38 |
| PTPRC     | protein tyrosine phosphatase, receptor type, C                                      | -1.39 |
| AOAH      | acyloxyacyl hydrolase (neutrophil)                                                  | -1.40 |
| CYBA      | cytochrome b-245, alpha polypeptide                                                 | -1.40 |
| GATA3     | GATA binding protein 3                                                              | -1.40 |
| NCF1B     | neutrophil cytosolic factor 1B pseudogene                                           | -1.42 |
| CSF1R     | colony stimulating factor 1 receptor                                                | -1.43 |
| CSF2RA    | Colony Stimulating Factor 2 Receptor Alpha Subunit                                  | -1.43 |
| MRC2      | mannose receptor, C type 2 (CD280)                                                  | -1.46 |
| PROCR     | protein C receptor, endothelial                                                     | -1.46 |
| NFKBID    | nuclear factor of kappa light polypeptide gene enhancer in B-cells inhibitor, delta | -1.47 |
| HLA-DOA   | major histocompatibility complex, class II, DO alpha                                | -1.50 |
| TNFSF8    | tumor necrosis factor (ligand) superfamily, member 8                                | -1.51 |
| TLR2      | toll-like receptor 2                                                                | -1.53 |
| IFI16     | interferon, gamma-inducible protein 16                                              | -1.58 |
| IL2RA     | interleukin 2 receptor, alpha                                                       | -1.60 |
| IRAK3     | interleukin-1 receptor-associated kinase 3                                          | -1.60 |
| SIGLEC10  | sialic acid binding Ig-like lectin 10                                               | -1.60 |
| CD86      | T-Lymphocyte Activation Antigen CD86                                                | -1.61 |
| NAMPT     | nicotinamide phosphoribosyltransferase                                              | -1.62 |
| IL21R     | interleukin 21 receptor                                                             | -1.64 |
| FCGR1B    | Fc fragment of IgG, high affinity Ib, receptor (CD64)                               | -1.66 |
| NCR3LG1   | natural killer cell cytotoxicity receptor 3 ligand 1                                | -1.70 |
| CXCR4     | chemokine (C-X-C motif) receptor 4                                                  | -1.72 |
| DEFB1     | defensin, beta 1                                                                    | -1.77 |
| TLR10     | toll-like receptor 10                                                               | -1.82 |
| TAGAP     | T-cell activation RhoGTPase activating protein                                      | -1.86 |
| MNDA      | myeloid cell nuclear differentiation antigen                                        | -1.88 |
| IL18      | interleukin 18                                                                      | -1.90 |
| CXCL3     | chemokine (C-X-C motif) ligand 3                                                    | -1.92 |
| NFAM1     | NFAT activating protein with ITAM motif 1                                           | -1.98 |
| APOBEC3C  | apolipoprotein B mRNA editing enzyme, catalytic polypeptide-like 3C                 | -2.00 |
| VSIG4     | V-set and immunoglobulin domain containing 4                                        | -2.00 |
| S100A9    | S100 calcium binding protein A9                                                     | -2.01 |
| NFATC1    | nuclear factor of activated T-cells, cytoplasmic, calcineurin-dependent 1           | -2.06 |
| CCL22     | chemokine (C-C motif) ligand 22                                                     | -2.11 |
| TNFRSF21  | tumor necrosis factor receptor superfamily, member 21                               | -2.11 |
| FCER1A    | Fc fragment of IgE, high affinity I, receptor for; alpha polypeptide                | -2.20 |
| SEMA3C    | semaphorin 3C                                                                       | -2.21 |
| IL7R      | interleukin 7 receptor                                                              | -2.33 |
| ITGB6     | integrin, beta 6                                                                    | -2.33 |
| CCR4      | chemokine (C-C motif) receptor 4                                                    | -2.43 |
| TNFRSF11B | tumor necrosis factor receptor superfamily, member 11b                              | -2.46 |
| APOBEC3A  | apolipoprotein B mRNA editing enzyme, catalytic polypeptide-like 3A                 | -2.51 |
| RGS2      | regulator of G-protein signaling 2                                                  | -2.52 |
| CXCL5     | chemokine (C-X-C motif) ligand 5                                                    | -2.91 |
| CXCL8     | chemokine (C-X-C motif) ligand 8 (IL-8)                                             | -2.93 |
| CCL2      | chemokine (C-C motif) ligand 2                                                      | -3.22 |
| IL1B      | interleukin 1, beta                                                                 | -3.38 |
| CXCR2     | chemokine (C-X-C motif) receptor 2                                                  | -3.53 |
| IL6       | interleukin 6                                                                       | -3.57 |

|        |                                                                                |       |
|--------|--------------------------------------------------------------------------------|-------|
| NCAM1  | neural cell adhesion molecule 1 (CD56)                                         | -3.58 |
| CXCL1  | chemokine (C-X-C motif) ligand 1 (melanoma growth stimulating activity, alpha) | -3.61 |
| SEMA3E | semaphorin 3E                                                                  | -5.05 |
| IL20RA | interleukin 20 receptor, alpha                                                 | -5.13 |
| CXCL6  | chemokine (C-X-C motif) ligand 6                                               | -5.64 |
| VTCN1  | V-set domain containing T cell activation inhibitor 1                          | -6.42 |

**Table S6.** Immune genes uniquely expressed in HBV-HCC.

| Gene symbol   | Gene title                                                                    | Fold change |
|---------------|-------------------------------------------------------------------------------|-------------|
| TREM2         | triggering receptor expressed on myeloid cells 2                              | 3.08        |
| CCL20         | chemokine (C-C motif) ligand 20                                               | 2.77        |
| CD109         | CD109 molecule                                                                | 2.69        |
| GIMAP1-GIMAP5 | GIMAP1-GIMAP5 readthrough                                                     | 2.35        |
| TRIM45        | tripartite motif containing 45                                                | 2.16        |
| ITGA2         | integrin, alpha 2 (CD49B, alpha 2 subunit of VLA-2 receptor)                  | 1.96        |
| NOS2          | nitric oxide synthase 2, inducible                                            | 1.87        |
| C1QTNF3       | C1q and tumor necrosis factor related protein 3                               | 1.85        |
| SQSTM1        | sequestosome 1                                                                | 1.85        |
| HMGA1         | high mobility group AT-hook 1                                                 | 1.78        |
| APOBEC3B      | apolipoprotein B mRNA editing enzyme, catalytic polypeptide-like 3B           | 1.66        |
| CD34          | CD34 molecule                                                                 | 1.65        |
| TNFRSF4       | tumor necrosis factor receptor superfamily, member 4                          | 1.63        |
| VNN2          | vanin 2                                                                       | 1.52        |
| CTSA          | cathepsin A                                                                   | 1.49        |
| S100A11       | S100 calcium binding protein A11                                              | 1.42        |
| TALDO1        | transaldolase 1                                                               | 1.34        |
| CTSC          | cathepsin C                                                                   | 1.30        |
| LOXL2         | lysyl oxidase-like 2                                                          | 1.18        |
| MIF           | macrophage migration inhibitory factor (glycosylation-inhibiting factor)      | 1.18        |
| SEMA4F        | semaphorin 4F                                                                 | 1.12        |
| IKBKE         | inhibitor of kappa light polypeptide gene enhancer in B-cells, kinase epsilon | 1.10        |
| CFH           | complement factor H                                                           | -1.03       |
| CFI           | complement factor I                                                           | -1.04       |
| IFNAR1        | interferon (alpha, beta and omega) receptor 1                                 | -1.07       |
| IL6ST         | interleukin 6 signal transducer                                               | -1.07       |
| CTSW          | cathepsin W                                                                   | -1.09       |
| FAS           | Fas Cell Surface Death Receptor (CD95, TNFRSF6)                               | -1.09       |
| GIMAP5        | GTPase, IMAP family member 5                                                  | -1.09       |
| IFITM1        | interferon induced transmembrane protein 1                                    | -1.12       |
| NKG7          | natural killer cell granule protein 7                                         | -1.14       |
| TBX21         | T-Cell-Specific T-Box Transcription Factor T-Bet (T-Box21)                    | -1.14       |
| CTSO          | cathepsin O                                                                   | -1.18       |
| C1RL          | complement component 1, r subcomponent-like                                   | -1.20       |
| BLNK          | B-cell linker                                                                 | -1.27       |
| TGFBR3        | transforming growth factor, beta receptor III                                 | -1.32       |
| C5            | complement component 5                                                        | -1.44       |
| IFNLR1        | interferon, lambda receptor 1                                                 | -1.45       |
| KLHL3         | kelch-like family member 3                                                    | -1.45       |
| PRF1          | perforin 1 (pore forming protein)                                             | -1.51       |
| TRGC2         | T cell receptor gamma constant 2                                              | -1.53       |
| TIAM1         | T-cell lymphoma invasion and metastasis 1                                     | -1.55       |
| CCL15-CCL14   | CCL15-CCL14 readthrough (NMD candidate)                                       | -1.57       |
| CD160         | CD160 molecule                                                                | -1.58       |
| C3            | complement component 3                                                        | -1.59       |
| LAG3          | lymphocyte-activation gene 3                                                  | -1.63       |
| CISH          | cytokine inducible SH2-containing protein                                     | -1.73       |
| TEK           | TEK receptor tyrosine kinase                                                  | -1.77       |
| FCRLA         | Fc receptor-like A                                                            | -1.79       |
| EOMES         | eomesodermin                                                                  | -1.81       |
| FCGR2B        | Fc fragment of IgG, low affinity IIb, receptor (CD32)                         | -1.83       |
| IL33          | interleukin 33                                                                | -1.83       |
| IL1RN         | interleukin 1 receptor antagonist                                             | -1.86       |
| KLRD1         | killer cell lectin-like receptor subfamily D, member 1                        | -2.12       |

|          |                                    |       |
|----------|------------------------------------|-------|
| PAX5     | paired box 5                       | -2.25 |
| ITGAD    | integrin, alpha D                  | -2.29 |
| CFHR3    | complement factor H-related 3      | -2.66 |
| CXCL2    | chemokine (C-X-C motif) ligand 2   | -2.67 |
| VNN1     | vanin 1                            | -2.78 |
| C6       | complement component 6             | -2.94 |
| HPX      | hemopexin                          | -3.07 |
| FCRL2    | Fc receptor-like 2                 | -3.14 |
| IL13RA2  | interleukin 13 receptor, alpha 2   | -3.18 |
| CXCR5    | chemokine (C-X-C motif) receptor 5 | -3.35 |
| IGHV4-31 | immunoglobulin heavy variable 4-31 | -4.05 |



**Table S7.** Immune genes commonly expressed in viral-associated HCC.

| Gene Symbol | Entrez Gene Name                                                                              | HCV-HCC | HBV-HCC |
|-------------|-----------------------------------------------------------------------------------------------|---------|---------|
| PSMD4       | proteasome (prosome, macropain) 26S subunit, non-ATPase, 4                                    | 1.34    | 1.15    |
| S100A10     | S100 calcium binding protein A10                                                              | 1.03    | 1.71    |
| TNFSF4      | tumor necrosis factor (ligand) superfamily, member 4                                          | 1.02    | 1.10    |
| MICB        | MHC class I polypeptide-related sequence B                                                    | 1.01    | 1.14    |
| GBP1        | guanylate binding protein 1, interferon-inducible                                             | -1.02   | -1.49   |
| TLR4        | toll-like receptor 4                                                                          | -1.07   | -1.26   |
| IL2RB       | interleukin 2 receptor, beta                                                                  | -1.11   | -1.62   |
| CCL14       | chemokine (C-C motif) ligand 14                                                               | -1.15   | -2.49   |
| IL4R        | interleukin 4 receptor                                                                        | -1.17   | -1.25   |
| CCL5        | chemokine (C-C motif) ligand 5                                                                | -1.18   | -1.12   |
| CD27        | Tumor Necrosis Factor Receptor Superfamily, Member 7                                          | -1.20   | -1.25   |
| PDCD1LG2    | programmed cell death 1 ligand 2 (PD-L2)                                                      | -1.20   | -1.36   |
| CCL3        | chemokine (C-C motif) ligand 3                                                                | -1.24   | -1.37   |
| CD244       | CD244 molecule, natural killer cell receptor 2B4                                              | -1.24   | -2.03   |
| C8B         | complement component 8, beta polypeptide                                                      | -1.26   | -2.62   |
| C1R         | complement component 1, r subcomponent                                                        | -1.27   | -1.64   |
| CD14        | Monocyte Differentiation Antigen CD14                                                         | -1.27   | -1.45   |
| CD8A        | T-Cell Surface Glycoprotein CD8 Alpha Chain                                                   | -1.27   | -2.38   |
| NFKBIZ      | nuclear factor of kappa light polypeptide gene enhancer in B-cells inhibitor, zeta            | -1.32   | -1.25   |
| CCR7        | chemokine (C-C motif) receptor 7                                                              | -1.38   | -2.08   |
| IL1RAP      | interleukin 1 receptor accessory protein                                                      | -1.38   | -2.28   |
| CFD         | complement factor D (adipsin)                                                                 | -1.39   | -1.73   |
| KLRB1       | killer cell lectin-like receptor subfamily B, member 1                                        | -1.39   | -1.40   |
| LILRB1      | leukocyte immunoglobulin-like receptor, subfamily B (with TM and ITIM domains), member 1      | -1.42   | -1.32   |
| TIGIT       | T cell immunoreceptor with Ig and ITIM domains                                                | -1.42   | -1.14   |
| LILRB2      | leukocyte immunoglobulin-like receptor, subfamily B (with TM and ITIM domains), member 2      | -1.45   | -1.16   |
| STAT4       | signal transducer and activator of transcription 4                                            | -1.48   | -1.58   |
| SIGLEC7     | sialic acid binding Ig-like lectin 7                                                          | -1.49   | -1.22   |
| FCRL3       | Fc receptor-like 3                                                                            | -1.51   | -2.31   |
| ISG20       | interferon stimulated exonuclease gene 20kDa                                                  | -1.51   | -1.10   |
| S100A6      | S100 calcium binding protein A6                                                               | -1.54   | 1.00    |
| IRF8        | interferon regulatory factor 8                                                                | -1.55   | -1.41   |
| TRAT1       | T cell receptor associated transmembrane adaptor 1                                            | -1.55   | -1.96   |
| CCL4        | chemokine (C-C motif) ligand 4                                                                | -1.63   | -1.34   |
| GZMK        | granzyme K (granzyme 3; tryptase II)                                                          | -1.63   | -1.76   |
| IL18R1      | interleukin 18 receptor 1                                                                     | -1.63   | -2.01   |
| CD4         | CD4 molecule                                                                                  | -1.65   | -1.35   |
| ITK         | IL2-inducible T-cell kinase                                                                   | -1.65   | -1.74   |
| LILRA1      | leukocyte immunoglobulin-like receptor, subfamily A (with TM domain), member 1                | -1.65   | -1.88   |
| LILRB5      | leukocyte immunoglobulin-like receptor, subfamily B (with TM and ITIM domains), member 5      | -1.65   | -2.35   |
| C8A         | complement component 8, alpha polypeptide                                                     | -1.66   | -2.06   |
| SIGLEC11    | sialic acid binding Ig-like lectin 11                                                         | -1.69   | -2.39   |
| TNFRSF10D   | tumor necrosis factor receptor superfamily, member 10d, decoy with truncated death domain     | -1.71   | -2.01   |
| LY9         | lymphocyte antigen 9                                                                          | -1.72   | -1.38   |
| TGFB3       | transforming growth factor, beta 3                                                            | -1.72   | -1.77   |
| SOCS2       | suppressor of cytokine signaling 2                                                            | -1.76   | -3.70   |
| IGLV6-57    | immunoglobulin lambda variable 6-57                                                           | -1.77   | -3.23   |
| CD69        | CD69 molecule                                                                                 | -1.78   | -1.63   |
| IL18RAP     | interleukin 18 receptor accessory protein                                                     | -1.79   | -1.69   |
| TNFRSF10C   | tumor necrosis factor receptor superfamily, member 10c, decoy without an intracellular domain | -1.80   | -1.44   |

|           |                                                                                |       |       |
|-----------|--------------------------------------------------------------------------------|-------|-------|
| C5AR1     | complement component 5a receptor 1                                             | -1.90 | -1.47 |
| MRC1      | mannose receptor, C type 1 (CD206)                                             | -1.97 | -2.25 |
| CD163     | Scavenger Receptor Cysteine-Rich Type 1 Protein M130                           | -2.02 | -1.85 |
| CFP       | complement factor properdin                                                    | -2.02 | -3.62 |
| CD1D      | CD1d molecule                                                                  | -2.06 | -1.78 |
| CR1       | complement component (3b/4b) receptor 1 (Knops blood group)                    | -2.12 | -2.22 |
| FCRL1     | Fc receptor-like 1                                                             | -2.13 | -2.74 |
| LILRA2    | leukocyte immunoglobulin-like receptor, subfamily A (with TM domain), member 2 | -2.15 | -1.74 |
| TNFSF11   | tumor necrosis factor (ligand) superfamily, member 11                          | -2.35 | -2.00 |
| TNFRSF13C | tumor necrosis factor receptor superfamily, member 13C                         | -2.36 | -1.96 |
| IGHM      | immunoglobulin heavy constant mu                                               | -2.40 | -4.14 |
| MZB1      | marginal zone B and B1 cell-specific protein                                   | -2.44 | -2.89 |
| IGHG2     | immunoglobulin heavy constant gamma 2 (G2m marker)                             | -2.46 | -3.58 |
| IGHD      | immunoglobulin heavy constant delta                                            | -2.48 | -2.30 |
| LILRA5    | leukocyte immunoglobulin-like receptor, subfamily A (with TM domain), member 5 | -2.48 | -2.39 |
| IGHA1     | immunoglobulin heavy constant alpha 1                                          | -2.51 | -3.86 |
| MS4A1     | membrane-spanning 4-domains, subfamily A, member 1 (CD20)                      | -2.58 | -2.95 |
| S100A8    | S100 calcium binding protein A8                                                | -2.58 | -2.00 |
| SELP      | selectin P (granule membrane protein 140kDa, antigen CD62)                     | -2.59 | -2.84 |
| POU2AF1   | POU class 2 associating factor 1                                               | -2.60 | -2.61 |
| IGHG3     | immunoglobulin heavy constant gamma 3 (G3m marker)                             | -2.76 | -4.39 |
| IRF4      | interferon regulatory factor 4                                                 | -2.80 | -2.49 |
| CXCL12    | chemokine (C-X-C motif) ligand 12 (Stromal cell-derived factor 1, SDF1)        | -2.81 | -3.53 |
| IGHA2     | immunoglobulin heavy constant alpha 2 (A2m marker)                             | -2.82 | -3.51 |
| CD79A     | CD79a molecule, immunoglobulin-associated alpha                                | -2.83 | -2.94 |
| FCRL5     | Fc receptor-like 5                                                             | -2.84 | -3.60 |
| IGHV3-23  | immunoglobulin heavy variable 3-23                                             | -2.95 | -4.52 |
| FPR1      | formyl peptide receptor 1                                                      | -3.01 | -2.04 |
| TGFA      | transforming growth factor, alpha                                              | -3.11 | -1.70 |
| IGKC      | immunoglobulin kappa constant                                                  | -3.12 | -4.01 |
| IGLC1     | immunoglobulin lambda constant 1 (Mcg marker)                                  | -3.13 | -3.73 |
| IGKV1-5   | Immunoglobulin Kappa Variable 1-5                                              | -3.14 | -3.84 |
| IDO2      | Indoleamine 2,3-Dioxygenase 2                                                  | -3.22 | -3.62 |
| CD5L      | CD5 molecule-like                                                              | -3.23 | -6.04 |
| SOCS3     | suppressor of cytokine signaling 3                                             | -3.31 | -1.73 |
| LY6E      | lymphocyte antigen 6 complex, locus E                                          | -3.34 | -2.44 |
| C7        | complement component 7                                                         | -3.36 | -4.80 |
| IGHG1     | immunoglobulin heavy constant gamma 1 (G1m marker)                             | -3.37 | -4.27 |
| CCL21     | chemokine (C-C motif) ligand 21                                                | -3.59 | -3.70 |
| IGLV3-21  | Immunoglobulin Lambda Variable 3-21                                            | -3.62 | -4.26 |
| IGLV1-44  | immunoglobulin lambda variable 1-44                                            | -3.63 | -4.07 |
| IL1RL1    | interleukin 1 receptor-like 1                                                  | -3.63 | -3.77 |
| TIMD4     | T-cell immunoglobulin and mucin domain containing 4                            | -3.65 | -4.31 |
| CCL19     | chemokine (C-C motif) ligand 19                                                | -3.96 | -3.18 |
| IGHG4     | immunoglobulin heavy constant gamma 4 (G4m marker)                             | -4.04 | -4.18 |
| CXCL14    | chemokine (C-X-C motif) ligand 14                                              | -4.43 | -5.42 |
| C9        | complement component 9                                                         | -4.91 | -4.60 |
| CLEC4G    | C-type lectin domain family 4, member G                                        | -5.58 | -6.68 |
| CLEC4M    | C-type lectin domain family 4, member M                                        | -5.60 | -8.06 |

## SUPPLEMENTARY FIGURES

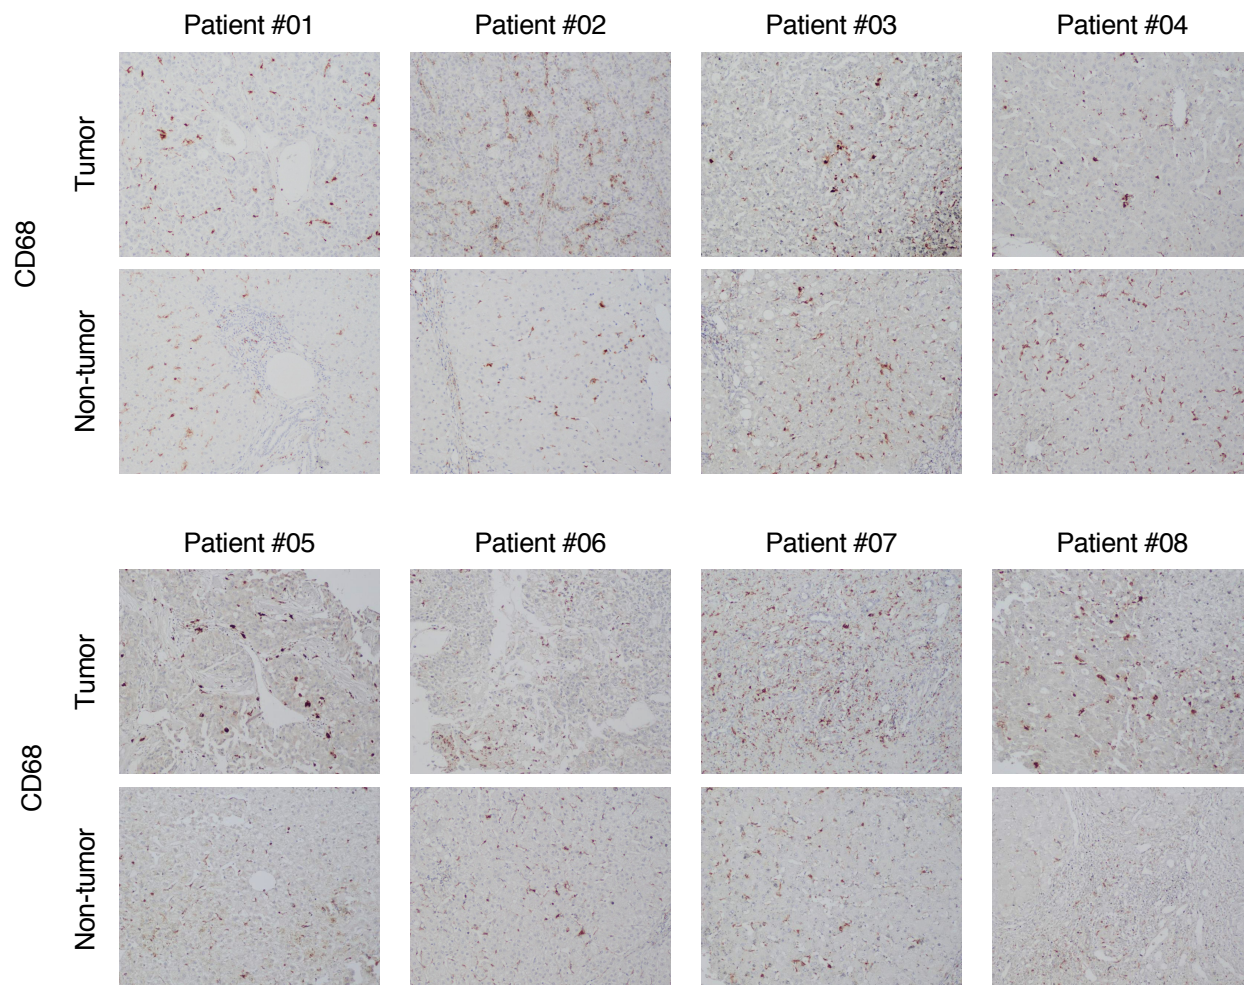

**Figure S1** Immunohistochemical staining of a monocyte/macrophage marker CD68 in liver tissue from 8 patients with HCV-associated HCC. Liver specimens obtained at the time of liver transplantation were stained with monoclonal antibodies against CD68 with the use of immunoperoxidase both within the tumor and in the surrounding nontumorous tissue from 8 patients with HCV-HCC. (Magnification: x10)
